# Supplementary material for: Impact of high fat diet on long non-coding RNAs and messenger RNAs expression in the aortas of ApoE(−/−) mice
Source: PubMed Central journal article supplement (PMC5048419; doi:10.1038/srep34161), 2016-10-04
Supplement: srep34161-s1.pdf [file srep34161-s1.pdf]

# **Impact of high fat diet on long non-coding RNAs and messenger**

## **RNAs expression in the aortas of ApoE(-/-) mice**

Mei-hua Bao<sup>1\*</sup>, Huai-qing Luo<sup>1</sup>, Li-hua Chen<sup>2</sup>, Liang Tang<sup>1</sup>, Kui-fen Ma<sup>3</sup>, Ju Xiang<sup>1</sup>, Li-ping Dong<sup>1</sup>, Jie Zeng<sup>1</sup>, Guang-yi Li<sup>1</sup>, Jian-ming Li<sup>1,4,5\*</sup>

<sup>1</sup> Department of Anatomy, Histology and Embryology, Institute of of Neuroscience, Changsha Medical University, Changsha, 410219, China. E-mails: luohuaiqing@163.com (Huai-qing Luo); tlcool318@163.com (Liang Tang); Xiang.ju@foxmail.com (Ju Xiang); ddongliping@163.com (Li-ping Dong); zengjie84117@163.com (Jie Zeng); 470064429@163.com (Guang-yi Li)

<sup>2</sup> The Third Xiangya Hospital of Central South University, Changsha 410013, Hunan, PR China. Email: chenlihuacc@163.com (Li-hua Chen).

<sup>3</sup> The First Affiliated Hospital, Zhejiang University, Hangzhou, Zhejiang, PR Chian. Email: jancemkf@163.com (Kui-fen Ma)

<sup>4</sup> Department of Neurology, Xiangya Hospital, Central South University, Changsha, Hunan 410008, China

<sup>5</sup> Department of Anatomy, Xiangya School of Medicine, Central South University , Changsha, Hunan 410013,China)

\* Correspondence to:

Mei-hua Bao, PhD, OR Jian-ming Li, PhD

Department of Anatomy, Histology and Embryology, Institute of Neuroscience, Changsha Medical University, Changsha, 410219, China. Tel: +86 731 88602839; Fax: +86 731 88602669

Email: [mhbao78@163.com](mailto:mhbao78@163.com) (Mei-hua Bao); [ljming0901@sina.com](mailto:ljming0901@sina.com) (Jian-ming Li)

**Figure-S1** KEGG pathway and GO enrichment (Molecular Function) analysis of FR384764, n297308, n297428 and n418309 correlated mRNAs.

**Table-S1:** Significantly and differentially expressed lncRNAs in high-fat and normal diet ApoE(-/-) mice

**Table-S2:** Significantly and differentially expressed mRNAs in high-fat and normal diet ApoE(-/-) mice

**Table-S3** Top 500 most correlated LncRNAs and mRNAs

**Table-S4** GO functional enrichment analysis of top 500 lncRNA-correlated mRNAs

**Table-S5** KEGG pathway analysis of top 500 lncRNA-correlated mRNAs

**Table-S6** 200 most significant related TF-lncRNA pairs

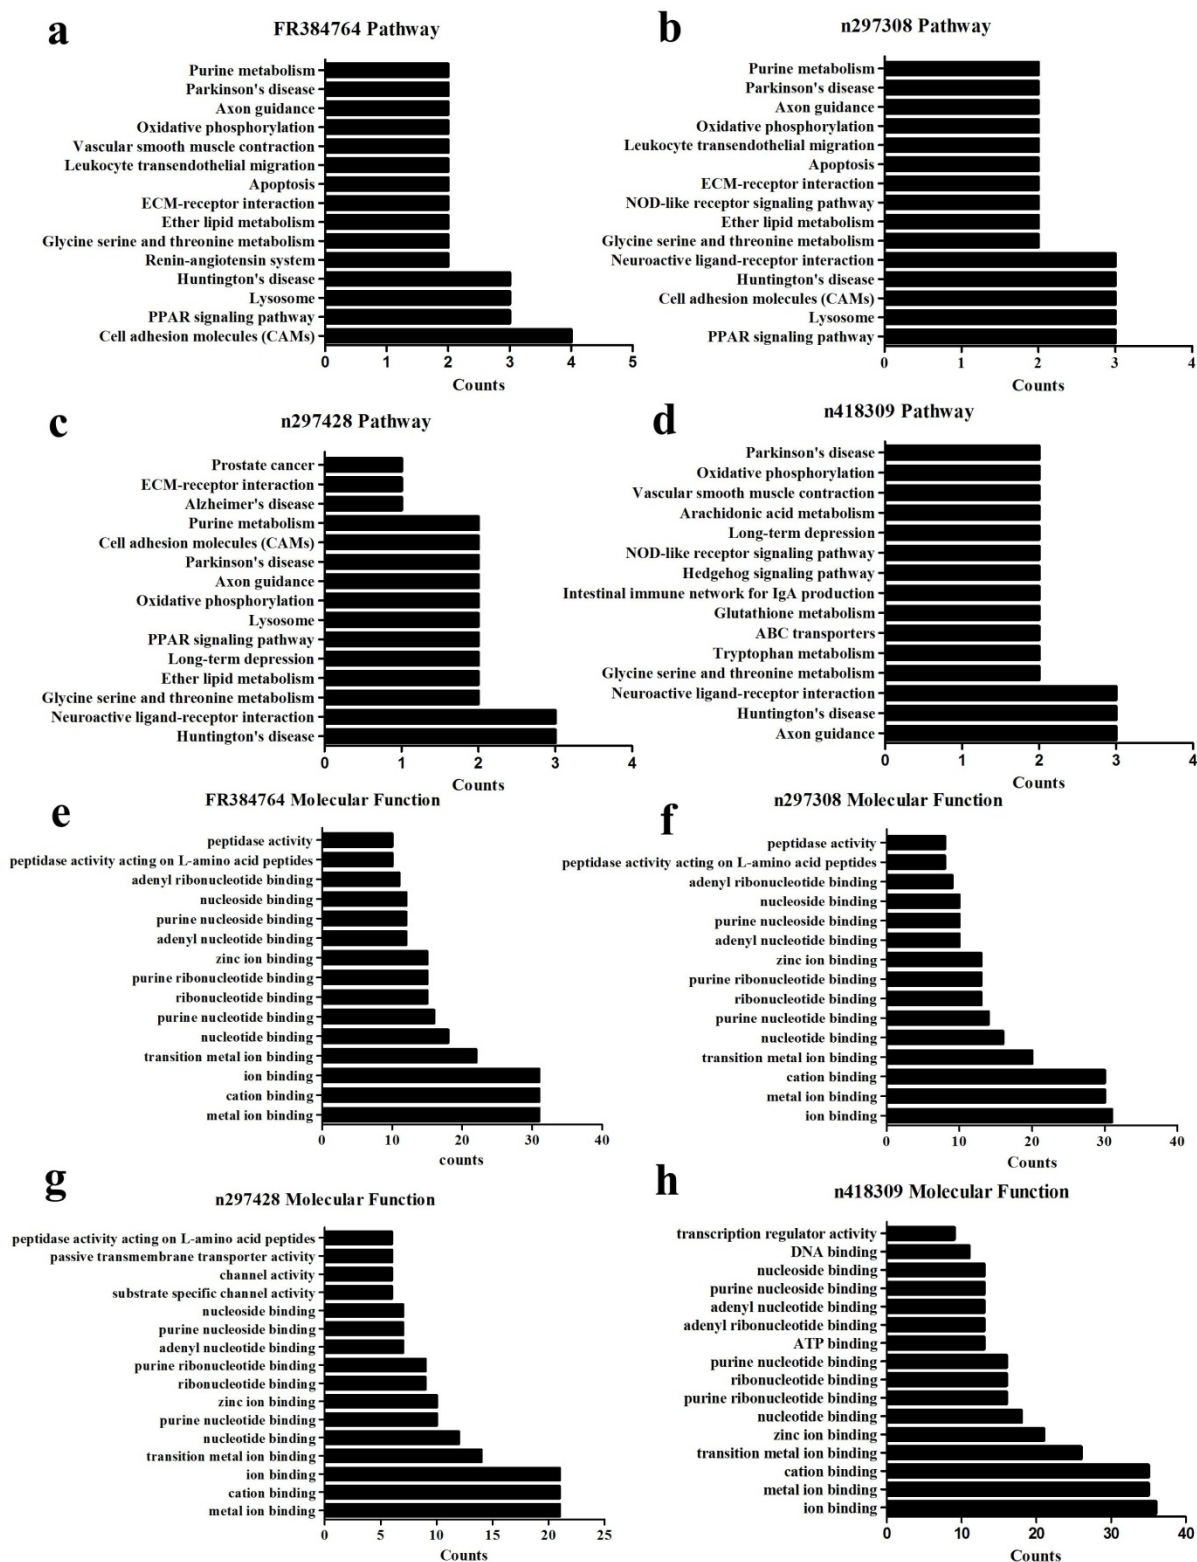

**Figure S1** KEGG pathway and GO enrichment (Molecular Function) analysis of FR384764, n297308, n297428 and n418309 correlated mRNAs. The top 15 most enriched GO (Molecular Function) categories and KEGG pathways were calculated and plotted. a-d, KEGG pathway for FR384764, n297308, n297428 and n418309; e-h, GO (Molecular Function) categories for FR384764, n297308, n297428 and n418309

**Table-S1: Significantly and differentially expressed lncRNAs in high-fat and normal diet ApoE(-/-) mice**

| ProbeName             | p           | FC (abs)  | Regulation | BioType             | Primary.Accession              |
|-----------------------|-------------|-----------|------------|---------------------|--------------------------------|
| mmu_19889_PI428960544 | 0.023563156 | 6.6065483 | up         | ncRNA               | FR326589                       |
| mmu_22142_PI428960544 | 0.00770111  | 6.5403714 | up         | ncRNA               | FR194887                       |
| mmu_5643_PI428960544  | 0.028952846 | 5.4900584 | up         | ncRNA               | FR078628                       |
| mmu_12355_PI428960544 | 0.038484745 | 5.279569  | up         | ncRNA               | FR134333                       |
| mmu_23341_PI428960544 | 0.009124966 | 4.8421855 | up         | ncRNA               | FR204953                       |
| mmu_23966_PI428960544 | 0.002932061 | 4.5948863 | up         | ncRNA               | FR082156                       |
| mmu_23928_PI428960544 | 0.03821654  | 4.3853273 | up         | ncRNA               | FR289473                       |
| mmu_20538_PI428960544 | 0.048980407 | 4.3433394 | up         | ncRNA               | FR279620                       |
| mmu_963_PI428960544   | 0.015355721 | 4.145839  | up         | lincRNA             | ENSMUST00000150216             |
| mmu_650_PI428960544   | 0.017392438 | 3.9888875 | up         | lincRNA             | ENSMUST00000149707             |
| mmu_21368_PI428960544 | 0.013935655 | 3.8130763 | up         | ncRNA               | FR279378                       |
| mmu_12484_PI428960544 | 0.03792329  | 3.6627505 | up         | ncRNA               | FR301809                       |
| mmu_8491_PI428960544  | 0.048261233 | 3.6376286 | up         | ncRNA               | FR208702                       |
| mmu_7133_PI428960544  | 0.036832657 | 3.557992  | up         | ncRNA               | FR000826                       |
| mmu_16075_PI428960544 | 0.002524217 | 3.5169146 | up         | ncRNA               | FR278883                       |
| mmu_30153_PI428960544 | 0.04753332  | 3.5146444 | up         | mRNAlike<br>lincRNA | n289317                        |
| mmu_24149_PI428960544 | 0.019089084 | 3.5034988 | up         | ncRNA               | FR347914                       |
| mmu_23919_PI428960544 | 0.008941423 | 3.3492064 | up         | ncRNA               | FR247760                       |
| mmu_28104_PI428960544 | 0.00575809  | 3.3455012 | up         | mRNAlike<br>lincRNA | n263575                        |
| mmu_2818_PI428960544  | 0.03773945  | 3.312418  | up         | ncRNA               | FR268824                       |
| mmu_11081_PI428960544 | 0.020598492 | 3.311713  | up         | ncRNA               | FR392828                       |
| A_30_P01018797        | 0.01600619  | 3.2422783 | up         | unknown             | chr15:38205154-<br>38206196_F  |
| mmu_3548_PI428960544  | 0.027604822 | 3.2340698 | up         | ncRNA               | FR120704                       |
| A_30_P01021354        | 0.017083308 | 3.2002678 | up         | unknown             | chr18:5813291-<br>5813708_R    |
| mmu_2136_PI428960544  | 0.040144473 | 3.1492121 | up         | ncRNA               | FR092975                       |
| mmu_12879_PI428960544 | 0.040874362 | 3.1173925 | up         | ncRNA               | FR168142                       |
| mmu_13420_PI428960544 | 0.01950497  | 3.1114726 | up         | ncRNA               | FR398266                       |
| mmu_6376_PI428960544  | 0.005027039 | 3.103433  | up         | ncRNA               | FR323263                       |
| mmu_11157_PI428960544 | 0.046267338 | 3.08132   | up         | ncRNA               | FR040835                       |
| A_30_P01018166        | 0.036979765 | 3.0806632 | up         | unknown             | chr7:134372392-<br>134372943_R |
| mmu_1274_PI428960544  | 0.001154897 | 3.0332644 | up         | lincRNA             | ENSMUST00000125309             |
| mmu_14003_PI428960544 | 0.029083358 | 3.0099747 | up         | ncRNA               | FR254927                       |
| mmu_11823_PI428960544 | 0.024438512 | 2.965918  | up         | ncRNA               | FR017535                       |
| A_30_P01032080        | 0.010737287 | 2.954146  | up         | unknown             | chr18:70400082-<br>70404236_R  |

|                       |             |           |    |                    |                           |
|-----------------------|-------------|-----------|----|--------------------|---------------------------|
| mmu_3078_PI428960544  | 0.023029735 | 2.9380777 | up | ncRNA              | FR325017                  |
| mmu_16214_PI428960544 | 0.02486451  | 2.9271333 | up | ncRNA              | FR155040                  |
| A_30_P01020159        | 0.026785105 | 2.9209218 | up | unknown            | chr11:6796679-6797670_F   |
| mmu_5104_PI428960544  | 0.04391799  | 2.906936  | up | ncRNA              | FR149067                  |
| mmu_25931_PI428960544 | 0.017815096 | 2.9042013 | up | ncRNA              | FR030947                  |
| mmu_17866_PI428960544 | 0.032166865 | 2.895322  | up | ncRNA              | FR117744                  |
| mmu_2940_PI428960544  | 0.030127095 | 2.8804865 | up | ncRNA              | FR389545                  |
| A_30_P01032005        | 0.047144275 | 2.8385632 | up | unknown            | chr13:98038568-98068079_F |
| mmu_34905_PI428960544 | 0.039697703 | 2.8361952 | up | ncRNA              | XR_141936.2               |
| mmu_32769_PI428960544 | 0.028759228 | 2.8340204 | up | lncRNA             | n415282                   |
| mmu_34077_PI428960544 | 0.009751953 | 2.8175285 | up | ncRNA              | XR_140871.1               |
| mmu_23856_PI428960544 | 0.04172041  | 2.8053327 | up | ncRNA              | FR028133                  |
| mmu_13666_PI428960544 | 0.024528423 | 2.7964616 | up | ncRNA              | FR142459                  |
| A_30_P01029641        | 0.026217261 | 2.7920523 | up | unknown            | chr5:31883451-31884082_F  |
| mmu_25297_PI428960544 | 0.043720126 | 2.7866087 | up | ncRNA              | FR124060                  |
| mmu_5087_PI428960544  | 0.015784875 | 2.7857049 | up | ncRNA              | FR334236                  |
| mmu_25672_PI428960544 | 0.025070107 | 2.7848315 | up | ncRNA              | FR112324                  |
| mmu_30578_PI428960544 | 0.010306944 | 2.769985  | up | mRNAlike<br>lncRNA | n292619                   |
| mmu_30276_PI428960544 | 0.0075121   | 2.7561219 | up | mRNAlike<br>lncRNA | n290544                   |
| mmu_3781_PI428960544  | 0.048080303 | 2.7474217 | up | ncRNA              | FR186619                  |
| mmu_4508_PI428960544  | 0.016159829 | 2.7340727 | up | ncRNA              | FR150621                  |
| mmu_29058_PI428960544 | 0.03210392  | 2.7291615 | up | mRNAlike<br>lncRNA | n273954                   |
| A_30_P01023930        | 0.013882695 | 2.7205498 | up | unknown            | chr14:33923944-34003394_F |
| mmu_12982_PI428960544 | 0.020821778 | 2.7023633 | up | ncRNA              | FR100205                  |
| mmu_26983_PI428960544 | 0.009816133 | 2.6920204 | up | ncRNA              | FR395103                  |
| mmu_26731_PI428960544 | 0.037888624 | 2.691197  | up | ncRNA              | FR233225                  |
| mmu_179_PI428960544   | 0.03264019  | 2.6338413 | up | lincRNA            | ENSMUST00000134627        |
| mmu_27496_PI428960544 | 0.038659267 | 2.6007533 | up | ncRNA              | FR065159                  |
| mmu_26_PI428960544    | 0.02758966  | 2.6001775 | up | ncRNA              | Gomafu                    |
| mmu_33968_PI428960544 | 0.03291615  | 2.5979187 | up | ncRNA              | NR_045776.1               |
| mmu_9384_PI428960544  | 8.55E-04    | 2.594224  | up | ncRNA              | FR007551                  |
| A_30_P01022813        | 0.005008529 | 2.5852578 | up | unknown            | chr10:39666719-39679959_R |
| A_30_P01031372        | 0.021731475 | 2.5756884 | up | unknown            | chr3:87757295-87774970_R  |
| mmu_28896_PI428960544 | 0.044392936 | 2.5640917 | up | mRNAlike<br>lncRNA | n271825                   |
| mmu_3871_PI428994341  | 0.022747232 | 2.556269  | up | ncRNA              | uc.411+                   |

|                       |             |           |    |                    |                                |
|-----------------------|-------------|-----------|----|--------------------|--------------------------------|
| mmu_29547_PI428960544 | 0.03551171  | 2.5496967 | up | mRNAlike<br>lncRNA | n280963                        |
| A_30_P01027923        | 0.02887718  | 2.5425677 | up | unknown            | chr2:116796887-<br>116797441_F |
| mmu_33795_PI428960544 | 0.008219932 | 2.5424557 | up | ncRNA              | XR_105914.2                    |
| A_30_P01018796        | 0.001646837 | 2.5223703 | up | unknown            | chr6:115468025-<br>115489250_R |
| mmu_20225_PI428960544 | 0.033889852 | 2.5207129 | up | ncRNA              | FR090778                       |
| A_30_P01027887        | 0.010532687 | 2.5182033 | up | unknown            | chr6:47959825-<br>47960502_R   |
| mmu_12301_PI428960544 | 0.019807743 | 2.506138  | up | ncRNA              | FR391590                       |
| mmu_7034_PI428960544  | 0.037889376 | 2.5056431 | up | ncRNA              | FR034857                       |
| mmu_10617_PI428960544 | 0.011292373 | 2.5050325 | up | ncRNA              | FR333763                       |
| mmu_5073_PI428960544  | 0.037074327 | 2.5026336 | up | ncRNA              | FR375933                       |
| A_30_P01025310        | 0.036782425 | 2.499172  | up | unknown            | chr2:108456668-<br>108532418_R |
| mmu_15412_PI428960544 | 0.005050104 | 2.495746  | up | ncRNA              | FR351980                       |
| mmu_8772_PI428960544  | 0.022181565 | 2.4942906 | up | ncRNA              | FR125080                       |
| mmu_794_PI428960544   | 0.047215775 | 2.494239  | up | lincRNA            | ENSMUST00000139056             |
| mmu_19296_PI428960544 | 0.04319484  | 2.4895132 | up | ncRNA              | FR202182                       |
| mmu_35640_PI428960544 | 0.04016116  | 2.464859  | up | ncRNA              | NR_033641.2                    |
| A_30_P01029190        | 0.038305547 | 2.4646716 | up | unknown            | chr8:41475940-<br>41476460_F   |
| mmu_21962_PI428960544 | 0.007326488 | 2.4407306 | up | ncRNA              | FR330268                       |
| mmu_24266_PI428960544 | 0.042930093 | 2.398131  | up | ncRNA              | FR090859                       |
| mmu_31453_PI428960544 | 0.002365315 | 2.3979487 | up | mRNAlike<br>lncRNA | n297308                        |
| mmu_8275_PI428960544  | 0.040743016 | 2.395396  | up | ncRNA              | FR286933                       |
| mmu_4608_PI428960544  | 0.043318145 | 2.3918982 | up | ncRNA              | FR117799                       |
| mmu_24659_PI428960544 | 0.046140507 | 2.3859751 | up | ncRNA              | FR114000                       |
| mmu_34053_PI428960544 | 0.049227282 | 2.373831  | up | ncRNA              | XR_104983.1                    |
| A_30_P01032161        | 0.04683037  | 2.372761  | up | unknown            | chr1:75075500-<br>75102200_R   |
| mmu_15584_PI428960544 | 0.043778464 | 2.3314264 | up | ncRNA              | FR032503                       |
| mmu_8650_PI428960544  | 0.026800226 | 2.315048  | up | ncRNA              | FR106089                       |
| mmu_20514_PI428960544 | 0.041017815 | 2.3125463 | up | ncRNA              | FR074898                       |
| A_30_P01020003        | 0.04380446  | 2.3050747 | up | unknown            | chr14:77511189-<br>77522852_F  |
| mmu_6507_PI428990136  | 0.03990378  | 2.2886844 | up | mRNAlike<br>lncRNA | n294791                        |
| A_30_P01021502        | 0.007168382 | 2.2868297 | up | unknown            | chr2:157236070-<br>157249445_R |
| A_30_P01018490        | 0.010897614 | 2.2779417 | up | unknown            | chr8:123901815-<br>123902167_R |

|                       |             |           |    |                    |                           |
|-----------------------|-------------|-----------|----|--------------------|---------------------------|
| mmu_29019_PI428960544 | 0.03553014  | 2.2725246 | up | mRNALike<br>lncRNA | n273521                   |
| A_30_P01023218        | 0.016908493 | 2.2713208 | up | unknown            | chr18:38836368-38935650_F |
| A_30_P01023590        | 0.009824371 | 2.2698638 | up | unknown            | chr8:96983590-96994419_F  |
| mmu_19347_PI428960544 | 0.037541483 | 2.2686877 | up | ncRNA              | FR374009                  |
| mmu_27624_PI428960544 | 0.045829844 | 2.2664516 | up | ncRNA              | FR234548                  |
| mmu_10219_PI428990136 | 0.031872008 | 2.266443  | up | ncRNA              | FR382845                  |
| mmu_32790_PI428960544 | 0.030185405 | 2.2590914 | up | lncRNA             | n415323                   |
| mmu_7917_PI428990136  | 0.036564685 | 2.252442  | up | lncRNA             | n416957                   |
| mmu_12259_PI428960544 | 0.03304125  | 2.2468956 | up | ncRNA              | FR171433                  |
| mmu_27231_PI428960544 | 0.036587734 | 2.2451406 | up | ncRNA              | FR115704                  |
| mmu_7024_PI428960544  | 0.002463199 | 2.2381797 | up | ncRNA              | FR302411                  |
| mmu_22632_PI428960544 | 0.007559009 | 2.233079  | up | ncRNA              | FR060087                  |
| A_30_P01031117        | 0.03083943  | 2.2303858 | up |                    | chr14:73729977-73751877_R |
| mmu_32835_PI428960544 | 0.036067802 | 2.2250137 | up | lncRNA             | n415399                   |
| mmu_17330_PI428960544 | 0.046079483 | 2.224169  | up | ncRNA              | FR269524                  |
| mmu_34221_PI428960544 | 0.031710315 | 2.2170591 | up | ncRNA              | NR_045899.1               |
| mmu_32820_PI428960544 | 0.041244015 | 2.2163415 | up | lncRNA             | n415372                   |
| mmu_4683_PI428960544  | 0.032453883 | 2.2124991 | up | ncRNA              | FR003993                  |
| A_30_P01027909        | 0.026618496 | 2.2103121 | up | unknown            | chr8:48476637-48492537_R  |
| mmu_27371_PI428960544 | 0.029853629 | 2.2081804 | up | ncRNA              | FR044110                  |
| A_30_P01033308        | 0.010824242 | 2.2074087 | up | unknown            | chr3:21964899-21974524_F  |
| mmu_22029_PI428960544 | 0.006356597 | 2.2064266 | up | ncRNA              | FR263105                  |
| mmu_5571_PI428960544  | 0.033310674 | 2.2026677 | up | ncRNA              | FR283503                  |
| mmu_21236_PI428960544 | 0.04997005  | 2.1980102 | up | ncRNA              | FR301567                  |
| mmu_2490_PI428960544  | 0.034862373 | 2.1943767 | up | ncRNA              | FR046015                  |
| mmu_1774_PI428960544  | 0.042885456 | 2.190391  | up | misc_RNA           | ENSMUST00000158863        |
| mmu_10236_PI428960544 | 0.0325216   | 2.188417  | up | ncRNA              | FR042390                  |
| A_30_P01020618        | 0.015307171 | 2.173115  | up | unknown            | chr3:21964899-21974885_F  |
| A_30_P01029980        | 0.013885483 | 2.168227  | up | unknown            | chr16:44720170-44723911_R |
| mmu_20936_PI428960544 | 0.026254963 | 2.1682143 | up | ncRNA              | FR312018                  |
| mmu_22806_PI428960544 | 0.047292385 | 2.1537068 | up | ncRNA              | FR007873                  |
| A_30_P01033059        | 0.04722711  | 2.1501608 | up | unknown            | chr13:74642700-74701900_F |
| mmu_8777_PI428990136  | 0.01678756  | 2.148299  | up | ncRNA              | NR_076393.1               |
| mmu_11584_PI428960544 | 0.017224615 | 2.1373372 | up | ncRNA              | FR064953                  |
| mmu_21306_PI428960544 | 0.029599363 | 2.1371691 | up | ncRNA              | FR387804                  |
| mmu_4919_PI428960544  | 0.030656677 | 2.1349902 | up | ncRNA              | FR019091                  |

|                       |             |           |    |                    |                                 |
|-----------------------|-------------|-----------|----|--------------------|---------------------------------|
| mmu_31141_PI428960544 | 0.03829869  | 2.1335437 | up | mRNAlike<br>lncRNA | n295927                         |
| A_30_P01026093        | 0.030422924 | 2.1327136 | up | unknown            | chr4:123572090-<br>123581365_F  |
| mmu_19378_PI428960544 | 0.032811638 | 2.132594  | up | ncRNA              | FR029539                        |
| mmu_628_PI428990136   | 0.029572587 | 2.128087  | up | ncRNA              | FR043548                        |
| mmu_3101_PI428960544  | 0.04058376  | 2.123979  | up | ncRNA              | FR001172                        |
| A_30_P01028704        | 0.037502278 | 2.1123943 | up | unknown            | chr1:69531191-<br>69570566_F    |
| mmu_18963_PI428960544 | 0.01957074  | 2.1121643 | up | ncRNA              | FR136228                        |
| mmu_11492_PI428960544 | 0.002826148 | 2.1115856 | up | ncRNA              | FR384764                        |
| mmu_35520_PI428960544 | 0.011742999 | 2.1050763 | up | ncRNA              | NR_073368.1                     |
| mmu_31483_PI428960544 | 0.020259283 | 2.1040065 | up | mRNAlike<br>lncRNA | n297428                         |
| mmu_10205_PI428960544 | 0.049763545 | 2.1008732 | up | ncRNA              | FR319563                        |
| mmu_28019_PI428960544 | 0.026878856 | 2.09898   | up | ncRNA              | FR199374                        |
| mmu_22177_PI428960544 | 0.03932856  | 2.0946405 | up | ncRNA              | FR394282                        |
| mmu_4095_PI428960544  | 0.049991973 | 2.0877526 | up | ncRNA              | FR140001                        |
| A_30_P01028297        | 0.019010816 | 2.082816  | up | unknown            | chr6:129151512-<br>129208737_R  |
| mmu_30244_PI428960544 | 0.018782414 | 2.0738676 | up | mRNAlike<br>lncRNA | n290305                         |
| mmu_4301_PI428960544  | 0.02303339  | 2.0653408 | up | ncRNA              | FR396644                        |
| mmu_28406_PI428960544 | 0.047664855 | 2.0561695 | up | mRNAlike<br>lncRNA | n265736                         |
| A_30_P01018273        | 0.04074268  | 2.0560977 | up | unknown            | chr12:55271691-<br>55276492_R   |
| mmu_3844_PI428960544  | 0.00968833  | 2.0468798 | up | ncRNA              | FR167447                        |
| mmu_4083_PI428990136  | 0.0399365   | 2.0432239 | up | ncRNA              | FR086793                        |
| mmu_32730_PI428960544 | 0.047250725 | 2.036267  | up | lncRNA             | n415206                         |
| A_30_P01020096        | 0.04601822  | 2.0341218 | up | unknown            | chr14:14688472-<br>14747272_F   |
| A_30_P01019611        | 0.012922458 | 2.033711  | up | unknown            | chr7:82902248-<br>82955248_F    |
| mmu_31184_PI428960544 | 0.019483639 | 2.0326414 | up | mRNAlike<br>lncRNA | n296070                         |
| mmu_31652_PI428960544 | 0.006439674 | 2.0230834 | up | lincRNA            | n343233                         |
| A_30_P01026958        | 0.013192127 | 2.014876  | up | unknown            | chr10:18036490-<br>18059965_F   |
| A_30_P01025459        | 0.01128211  | 2.0123346 | up | unknown            | chr13:34693404-<br>34717987_F   |
| mmu_8762_PI428960544  | 0.032639958 | 2.0102925 | up | ncRNA              | FR066939                        |
| mmu_34273_PI428960544 | 0.020541158 | 2.0008893 | up | ncRNA              | NR_033764.1                     |
| A_30_P01032003        | 0.03989104  | 2.0007617 | up | unknown            | chr13:107822042-<br>107823753_F |



|                       |             |           |      |                          |                             |
|-----------------------|-------------|-----------|------|--------------------------|-----------------------------|
| A_30_P01032459        | 0.030034743 | 6.9042463 | down | unknown                  | chrX:102568332-102587093_R  |
| mmu_33288_PI428960544 | 0.01764818  | 4.2644243 | down | lncRNA                   | n418283                     |
| mmu_21105_PI428960544 | 0.031598497 | 4.136219  | down | ncRNA                    | FR375498                    |
| mmu_28436_PI428960544 | 0.038946223 | 4.1236954 | down | mRNALike<br>lncRNA       | n265955                     |
| mmu_33300_PI428960544 | 0.011352751 | 4.014023  | down | lncRNA                   | n418309                     |
| mmu_33423_PI428960544 | 0.014372224 | 3.942122  | down | lncRNA                   | n419646                     |
| A_30_P01026041        | 0.026998533 | 3.8855588 | down | unknown                  | chr13:98281158-98285757_F   |
| mmu_12453_PI428960544 | 0.03952362  | 3.6667264 | down | ncRNA                    | FR331566                    |
| mmu_30778_PI428960544 | 0.04003301  | 3.5566716 | down | mRNALike<br>lncRNA       | n294011                     |
| mmu_27139_PI428960544 | 0.004500653 | 3.5109322 | down | ncRNA                    | FR251112                    |
| A_30_P01022596        | 0.01831967  | 3.4984138 | down | unknown                  | chr13:15947521-15999246_R   |
| A_30_P01031423        | 0.019505797 | 3.4926527 | down | unknown                  | chr5:149751979-149808240_F  |
| mmu_2946_PI428990136  | 0.016914584 | 3.4344575 | down | ncRNA                    | FR312820                    |
| A_30_P01027189        | 0.04459727  | 3.2933893 | down | unknown                  | chr10:116814196-116920696_R |
| A_30_P01022319        | 0.01807285  | 3.265757  | down | unknown                  | chr15:100908323-100908645_F |
| A_30_P01030233        | 0.013721625 | 3.1706235 | down | unknown                  | chr9:56646768-56649068_R    |
| A_30_P01025341        | 0.012241075 | 3.0579627 | down | unknown                  | chr18:69923410-69965360_R   |
| A_30_P01019875        | 0.002412234 | 3.0573971 | down | unknown                  | chr5:110182844-110228345_R  |
| A_30_P01022610        | 0.03731524  | 3.0285838 | down | unknown                  | chr1:183142656-183163206_R  |
| mmu_22178_PI428960544 | 0.0438909   | 2.9946027 | down | ncRNA                    | FR402142                    |
| mmu_10165_PI428990136 | 0.023415042 | 2.8444433 | down | processed_t<br>ranscript | ENSMUST00000163396          |
| mmu_21960_PI428960544 | 0.019531608 | 2.825909  | down | ncRNA                    | FR283931                    |
| A_30_P01019907        | 0.007787522 | 2.8112855 | down | unknown                  | chr13:76326228-76332632_F   |
| mmu_32583_PI428960544 | 0.033733517 | 2.796274  | down | lncRNA                   | n414371                     |
| mmu_5662_PI428960544  | 0.046895236 | 2.7944968 | down | ncRNA                    | FR284965                    |
| mmu_11372_PI428960544 | 0.046551984 | 2.7935345 | down | ncRNA                    | FR097477                    |
| mmu_8192_PI428960544  | 0.03205137  | 2.768107  | down | ncRNA                    | FR087925                    |
| mmu_11164_PI428960544 | 0.030689355 | 2.7354522 | down | ncRNA                    | FR185165                    |
| A_30_P01027302        | 0.024274392 | 2.7353764 | down | unknown                  | chr13:66381200-66410200_F   |

|                       |             |           |      |                     |                             |
|-----------------------|-------------|-----------|------|---------------------|-----------------------------|
| A_30_P01027503        | 0.02138378  | 2.705112  | down | unknown             | chr11:120041124-120052299_F |
| A_30_P01030642        | 0.011392873 | 2.7048914 | down | unknown             | chr11:120079199-120130099_R |
| A_30_P01023528        | 0.024389397 | 2.6986594 | down | unknown             | chr1:138570107-138632310_R  |
| mmu_7989_PI428960544  | 0.033628024 | 2.6926668 | down | ncRNA               | FR301533                    |
| A_30_P01028835        | 0.023176897 | 2.6676996 | down | unknown             | chr1:92549499-92550225_R    |
| mmu_25642_PI428960544 | 9.08E-05    | 2.6572998 | down | ncRNA               | FR283504                    |
| mmu_5159_PI428960544  | 0.022221426 | 2.6336071 | down | ncRNA               | FR010306                    |
| mmu_32238_PI428960544 | 0.02047917  | 2.6229687 | down | lincRNA             | n412060                     |
| mmu_14252_PI428960544 | 0.048546165 | 2.5963526 | down | ncRNA               | FR052210                    |
| A_30_P01022679        | 0.017787576 | 2.5792506 | down | unknown             | chr3:40439525-40509975_R    |
| mmu_11513_PI428960544 | 0.028221956 | 2.5293198 | down | ncRNA               | FR019981                    |
| A_30_P01032830        | 6.66E-04    | 2.505982  | down | unknown             | chr5:137392195-137426421_F  |
| mmu_1097_PI428960544  | 0.024150344 | 2.5038707 | down | antisense           | ENSMUST00000181887          |
| mmu_118_PI428960544   | 0.04198807  | 2.4989903 | down | lincRNA             | ENSMUST00000155173          |
| A_30_P01019182        | 0.037324745 | 2.4944587 | down | unknown             | chr1:138473514-138476054_R  |
| mmu_31315_PI428960544 | 0.031338718 | 2.4922397 | down | mRNAlike<br>lincRNA | n296710                     |
| mmu_10808_PI428960544 | 0.028998792 | 2.4909513 | down | ncRNA               | FR298560                    |
| mmu_29726_PI428960544 | 0.012212492 | 2.4785485 | down | mRNAlike<br>lincRNA | n283487                     |
| A_30_P01022534        | 0.01814157  | 2.4778404 | down | unknown             | chr10:62262341-62269593_F   |
| A_30_P01018129        | 0.031643514 | 2.4745913 | down | unknown             | chr19:23068397-23190256_R   |
| A_30_P01033107        | 0.01159532  | 2.4407716 | down | unknown             | chr14:55317199-55317670_R   |
| mmu_6385_PI428960544  | 0.049094852 | 2.4406228 | down | ncRNA               | FR071800                    |
| A_30_P01024600        | 0.037837543 | 2.436896  | down | unknown             | chr8:126396600-126407275_R  |
| A_30_P01024783        | 0.021961328 | 2.435037  | down | unknown             | chr10:8606683-8665783_R     |
| mmu_9198_PI428960544  | 0.015093512 | 2.410183  | down | ncRNA               | FR382833                    |
| mmu_28093_PI428960544 | 0.02704069  | 2.3958325 | down | mRNAlike<br>lincRNA | n263541                     |
| A_30_P01022501        | 0.028991783 | 2.3936949 | down | unknown             | chr8:119732348-119749198_R  |
| A_30_P01031789        | 0.035382196 | 2.3922997 | down | unknown             | chr1:196445304-196445818_R  |

|                       |             |           |      |                          |                                 |
|-----------------------|-------------|-----------|------|--------------------------|---------------------------------|
| mmu_29988_PI428960544 | 0.011641372 | 2.384501  | down | mRNAlike<br>lncRNA       | n287284                         |
| mmu_26183_PI428960544 | 0.03498044  | 2.3754466 | down | ncRNA                    | FR296035                        |
| A_30_P01027704        | 0.025110798 | 2.373197  | down | unknown                  | chr12:110003268-<br>110030953_F |
| mmu_4021_PI428994341  | 0.004077047 | 2.3708851 | down | ncRNA                    | uc.427+                         |
| A_30_P01030161        | 0.013195121 | 2.3652973 | down | unknown                  | chr7:133402766-<br>133415516_R  |
| mmu_21127_PI428960544 | 0.03303173  | 2.3562133 | down | ncRNA                    | FR168758                        |
| mmu_1624_PI428990136  | 0.03797109  | 2.349007  | down | ncRNA                    | FR287008                        |
| mmu_2189_PI428960544  | 0.013430556 | 2.3424354 | down | ncRNA                    | FR279905                        |
| mmu_945_PI428960544   | 0.037189703 | 2.3379676 | down | lincRNA                  | ENSMUST00000180590              |
| A_30_P01020655        | 0.03191105  | 2.3371174 | down | unknown                  | chr1:92546371-<br>92551596_R    |
| mmu_452_PI428960544   | 0.00764293  | 2.3305519 | down | processed_t<br>ranscript | ENSMUST00000125250              |
| A_30_P01027698        | 0.018198254 | 2.3292997 | down | unknown                  | chr1:167515313-<br>167516122_F  |
| A_30_P01023619        | 0.025082035 | 2.318276  | down | unknown                  | chr12:89519675-<br>89533975_F   |
| A_30_P01026874        | 0.004059054 | 2.3156645 | down | unknown                  | chr1:183783306-<br>183834531_F  |
| A_30_P01028311        | 0.012571103 | 2.3097718 | down | unknown                  | chr2:158169020-<br>158191295_F  |
| A_30_P01032716        | 0.014462663 | 2.3088627 | down | unknown                  | chr9:27148989-<br>27155714_R    |
| mmu_29734_PI428960544 | 0.0415631   | 2.2987878 | down | mRNAlike<br>lncRNA       | n283793                         |
| mmu_7865_PI428960544  | 0.025199296 | 2.290531  | down | ncRNA                    | FR395572                        |
| mmu_34977_PI428960544 | 0.01206234  | 2.288283  | down | ncRNA                    | XR_140433.1                     |
| mmu_25111_PI428960544 | 0.025136832 | 2.2875602 | down | ncRNA                    | FR266999                        |
| mmu_3227_PI428990136  | 0.00117968  | 2.2856014 | down | ncRNA                    | FR341317                        |
| mmu_16003_PI428960544 | 0.017741848 | 2.2849877 | down | ncRNA                    | FR101946                        |
| A_30_P01017745        | 0.014221753 | 2.2778318 | down | unknown                  | chr9:14480441-<br>14483362_F    |
| mmu_18132_PI428960544 | 0.035464574 | 2.2764018 | down | ncRNA                    | FR385633                        |
| mmu_21041_PI428960544 | 0.002842722 | 2.273278  | down | ncRNA                    | FR087537                        |
| A_30_P01020505        | 0.03601559  | 2.2726173 | down | unknown                  | chr6:52046805-<br>52072744_R    |
| A_30_P01026936        | 0.030754719 | 2.2713442 | down | unknown                  | chr12:16873410-<br>16873872_F   |
| A_30_P01024794        | 0.004521682 | 2.2709405 | down | unknown                  | chr17:64063362-<br>64066067_R   |
| A_30_P01027781        | 0.013154849 | 2.267218  | down | unknown                  | chr7:26212709-<br>26230775_F    |

|                       |             |           |      |           |                            |
|-----------------------|-------------|-----------|------|-----------|----------------------------|
| A_30_P01023252        | 0.017467622 | 2.2656896 | down | unknown   | chr9:58301467-58323783_F   |
| A_30_P01030037        | 0.003630241 | 2.2651737 | down | unknown   | chr14:25923295-25923893_F  |
| mmu_19340_PI428960544 | 0.027411953 | 2.2645314 | down | ncRNA     | FR057053                   |
| mmu_8561_PI428960544  | 0.03338078  | 2.263598  | down | ncRNA     | FR139436                   |
| mmu_24851_PI428960544 | 0.04559214  | 2.2566936 | down | ncRNA     | FR285140                   |
| mmu_344_PI428960544   | 0.014360337 | 2.2562218 | down | antisense | ENSMUST00000181563         |
| mmu_22446_PI428960544 | 0.027249636 | 2.2557466 | down | ncRNA     | FR035623                   |
| mmu_23140_PI428960544 | 0.03697652  | 2.2543762 | down | ncRNA     | FR049065                   |
| mmu_18194_PI428960544 | 0.025665564 | 2.252142  | down | ncRNA     | FR283082                   |
| A_30_P01030857        | 0.043520357 | 2.2486176 | down | unknown   | chr15:96597330-96663683_F  |
| mmu_10283_PI428960544 | 0.036773346 | 2.2440228 | down | ncRNA     | FR066795                   |
| A_30_P01030971        | 0.014055186 | 2.2380555 | down | unknown   | chr9:121845920-121858120_F |
| A_30_P01028973        | 0.047730476 | 2.2370107 | down | unknown   | chr9:4200788-4261404_F     |
| mmu_331_PI428960544   | 0.008400203 | 2.2346442 | down | lincRNA   | ENSMUST00000141575         |
| mmu_361_PI428960544   | 0.017884566 | 2.2156718 | down | unknown   | ENSMUST00000174110         |
| mmu_5246_PI428960544  | 0.041470658 | 2.212419  | down | ncRNA     | FR100940                   |
| mmu_2724_PI428960544  | 0.023820087 | 2.208435  | down | ncRNA     | FR000724                   |
| mmu_10225_PI428960544 | 3.83E-05    | 2.2045014 | down | ncRNA     | FR238898                   |
| A_30_P01021046        | 0.031785145 | 2.1967378 | down | unknown   | chr2:132722530-132726802_F |
| A_30_P01026615        | 0.010771721 | 2.1907341 | down | unknown   | chr9:66976750-67014625_F   |
| mmu_25579_PI428960544 | 0.04850081  | 2.1822586 | down | ncRNA     | FR057875                   |
| mmu_27236_PI428960544 | 0.009006086 | 2.1809776 | down | ncRNA     | FR160504                   |
| A_30_P01019125        | 0.00945897  | 2.1598532 | down | unknown   | chr7:96640618-96649018_F   |
| mmu_17024_PI428960544 | 0.015198571 | 2.1597576 | down | ncRNA     | FR016598                   |
| A_30_P01018441        | 0.022463292 | 2.1544268 | down | unknown   | chr15:32167516-32174417_R  |
| mmu_14135_PI428960544 | 0.041658662 | 2.1518717 | down | ncRNA     | FR230183                   |
| mmu_271_PI428994341   | 0.045557186 | 2.1491482 | down | ncRNA     | uc.31+                     |
| mmu_10275_PI428960544 | 0.020131843 | 2.1467834 | down | ncRNA     | FR152607                   |
| A_30_P01020067        | 0.004916142 | 2.138676  | down | unknown   | chr14:21621875-21638625_R  |
| mmu_26090_PI428960544 | 0.019206157 | 2.1361675 | down | ncRNA     | FR215734                   |
| A_30_P01020455        | 0.034770347 | 2.1358068 | down | unknown   | chr6:86425510-86450160_F   |
| mmu_17900_PI428960544 | 0.023148267 | 2.135754  | down | ncRNA     | FR380314                   |
| A_30_P01017878        | 0.007169262 | 2.135222  | down | unknown   | chr5:35893908-35896613_R   |
| mmu_15990_PI428960544 | 0.047904074 | 2.1343312 | down | ncRNA     | FR338634                   |

|                       |             |           |      |                    |                            |
|-----------------------|-------------|-----------|------|--------------------|----------------------------|
| mmu_1364_PI428960544  | 0.013056339 | 2.133426  | down | misc_RNA           | ENSMUST00000157205         |
| A_30_P01019217        | 0.016911205 | 2.1285634 | down | unknown            | chr13:98513868-98517366_R  |
| mmu_28939_PI428960544 | 0.013129035 | 2.1280828 | down | mRNALike<br>lncRNA | n272641                    |
| mmu_19062_PI428960544 | 0.016851876 | 2.126122  | down | ncRNA              | FR121241                   |
| A_30_P01031934        | 0.037664108 | 2.1228049 | down | unknown            | chr4:35106125-35127700_F   |
| A_30_P01026357        | 0.019616615 | 2.1220376 | down | unknown            | chr4:116790373-116797823_F |
| mmu_585_PI428980890   | 0.044789713 | 2.1214995 | down | ncRNA              | FR001084                   |
| mmu_26351_PI428960544 | 0.01881121  | 2.118441  | down | ncRNA              | FR064590                   |
| mmu_12315_PI428960544 | 0.02310125  | 2.1174073 | down | ncRNA              | FR054476                   |
| A_30_P01025047        | 0.002430505 | 2.1158981 | down | unknown            | chrX:165792277-165807952_R |
| A_30_P01021835        | 0.03904252  | 2.114595  | down | unknown            | chr7:91558475-91733625_R   |
| mmu_15351_PI428960544 | 0.017821867 | 2.114136  | down | ncRNA              | FR087516                   |
| A_30_P01027969        | 0.048478946 | 2.1117315 | down | unknown            | chr16:4871449-4874336_R    |
| A_30_P01018820        | 0.009623749 | 2.1096225 | down | unknown            | chr9:27148989-27155714_R   |
| A_30_P01032833        | 0.012419155 | 2.1093123 | down | unknown            | chr2:72818943-72826893_R   |
| mmu_771_PI428994341   | 0.039914522 | 2.1060395 | down | ncRNA              | uc.83+                     |
| A_30_P01032425        | 0.015645128 | 2.1054952 | down | unknown            | chr8:26345571-26346095_R   |
| A_30_P01022508        | 0.012299637 | 2.104819  | down | unknown            | chr5:54053882-54054174_F   |
| A_30_P01030360        | 0.028412344 | 2.0962455 | down | unknown            | chr11:33414450-33450750_F  |
| A_30_P01031798        | 0.005420569 | 2.0944998 | down | unknown            | chr7:31709550-31723025_F   |
| mmu_27955_PI428960544 | 0.010624005 | 2.0937715 | down | ncRNA              | FR065962                   |
| A_30_P01031642        | 0.044676058 | 2.0923152 | down | unknown            | chr17:29374758-29387733_R  |
| A_30_P01027155        | 0.044732917 | 2.089499  | down | unknown            | chr9:68349343-68411643_R   |
| A_30_P01019679        | 0.016120747 | 2.086273  | down | unknown            | chr6:37630192-37682692_R   |
| A_30_P01033372        | 3.40E-04    | 2.08536   | down | unknown            | chr10:24269165-24276690_F  |
| mmu_2185_PI428960544  | 0.03831714  | 2.0796025 | down | ncRNA              | FR302003                   |
| A_30_P01018664        | 0.026820624 | 2.07102   | down | unknown            | chr3:35782698-35789932_R   |

|                       |             |           |      |           |                             |
|-----------------------|-------------|-----------|------|-----------|-----------------------------|
| A_30_P01018171        | 0.027798342 | 2.06712   | down | unknown   | chr11:69184157-69201732_R   |
| mmu_19439_PI428960544 | 0.014271176 | 2.0669875 | down | ncRNA     | FR061730                    |
| mmu_5787_PI428960544  | 0.01091862  | 2.0647528 | down | ncRNA     | FR187810                    |
| A_30_P01022455        | 0.041985184 | 2.0641687 | down | unknown   | chr9:27155685-27156100_F    |
| mmu_12637_PI428960544 | 0.026744938 | 2.062086  | down | ncRNA     | FR162622                    |
| mmu_3104_PI428960544  | 0.0402705   | 2.0592556 | down | ncRNA     | FR011959                    |
| mmu_17416_PI428960544 | 4.00E-05    | 2.0587    | down | ncRNA     | FR184042                    |
| A_30_P01025376        | 0.003237647 | 2.0559545 | down | unknown   | chr2:71576218-71603818_R    |
| mmu_22751_PI428960544 | 0.013097336 | 2.0553932 | down | ncRNA     | FR121323                    |
| mmu_24455_PI428960544 | 0.002966158 | 2.0541143 | down | ncRNA     | FR219193                    |
| mmu_1125_PI428960544  | 0.005725785 | 2.0520942 | down | antisense | ENSMUST00000134129          |
| A_30_P01021538        | 0.021673927 | 2.0518541 | down | unknown   | chr2:151992806-152025456_F  |
| mmu_9752_PI428960544  | 0.006350653 | 2.0506284 | down | ncRNA     | FR055065                    |
| A_30_P01018439        | 0.022327261 | 2.0498476 | down | unknown   | chr3:93582250-93592950_F    |
| mmu_334_PI428960544   | 0.023119668 | 2.0493479 | down | lincRNA   | ENSMUST00000132130          |
| A_30_P01031525        | 0.018976577 | 2.0490186 | down | unknown   | chr7:80762708-80763274_R    |
| mmu_345_PI428960544   | 0.003001115 | 2.0465593 | down | lincRNA   | ENSMUST00000130677          |
| A_30_P01026685        | 0.024701972 | 2.0422573 | down | unknown   | chr11:116936834-116948799_R |
| mmu_33766_PI428960544 | 0.042725112 | 2.0394514 | down | ncRNA     | XR_141342.2                 |
| mmu_12081_PI428960544 | 0.010358787 | 2.0362997 | down | ncRNA     | FR365932                    |
| A_30_P01023983        | 0.044055622 | 2.0273085 | down | unknown   | chr16:59557120-59602070_R   |
| mmu_34199_PI428960544 | 0.017124603 | 2.0272737 | down | ncRNA     | XR_141927.1                 |
| A_30_P01032892        | 0.049760524 | 2.024637  | down | unknown   | chr8:129102060-129109035_F  |
| A_30_P01031061        | 0.020148082 | 2.021439  | down | unknown   | chr1:183783306-183834531_F  |
| mmu_18399_PI428960544 | 0.010291548 | 2.0208619 | down | ncRNA     | FR047247                    |
| mmu_17324_PI428960544 | 0.040216777 | 2.020591  | down | ncRNA     | FR129526                    |
| A_30_P01025347        | 0.041025043 | 2.0202909 | down | unknown   | chr8:108153471-108159672_F  |
| mmu_4199_PI428960544  | 0.01466605  | 2.01822   | down | ncRNA     | FR177295                    |
| A_30_P01030661        | 0.005499327 | 2.0165284 | down | unknown   | chr15:60732209-60732822_R   |
| mmu_18525_PI428960544 | 0.027496647 | 2.0165238 | down | ncRNA     | FR029778                    |
| mmu_9585_PI428960544  | 0.015517354 | 2.0138235 | down | ncRNA     | FR237950                    |
| mmu_15016_PI428960544 | 0.005695541 | 2.0123365 | down | ncRNA     | FR003529                    |
| mmu_2856_PI428960544  | 0.033858698 | 2.0116575 | down | ncRNA     | FR294279                    |

|                       |             |           |      |         |                             |
|-----------------------|-------------|-----------|------|---------|-----------------------------|
| A_30_P01032356        | 0.023731638 | 2.0089705 | down | unknown | chr14:105497388-105511063_F |
| mmu_32101_P1428960544 | 0.020649977 | 2.0072768 | down | lincRNA | n344241                     |
| A_30_P01023152        | 0.048081096 | 2.0023656 | down | unknown | chr17:10057283-10075014_F   |
| mmu_8619_P1428990136  | 0.026401438 | 2.001239  | down | ncRNA   | NR_102339.1                 |
| A_30_P01019636        | 0.015422435 | 2.0004997 | down | unknown | chr1:183783306-183834531_F  |
| A_30_P01029676        | 0.02586736  | 2.0004468 | down | unknown | chr13:48576557-48581632_F   |

---

**Table-S2: Significantly and differentially expressed mRNAs in high-fat and normal diet ApoE(-/-) mice**

| <b>ProbeName</b> | <b>p</b>    | <b>FC (abs)</b> | <b>Regulation</b> | <b>Entrez.Gene.ID</b> | <b>Symbol</b> |
|------------------|-------------|-----------------|-------------------|-----------------------|---------------|
| A_55_P2085142    | 0.047909692 | 12.779388       | up                | 20750                 | Spp1          |
| A_55_P2099677    | 0.039917916 | 10.249345       | up                | 14725                 | Lrp2          |
| A_55_P2126167    | 0.038570475 | 8.750357        | up                | 234155                | Mboat4        |
| A_52_P333097     | 1.15145E-05 | 6.273958        | up                | 171166                | Mcoln3        |
| A_55_P2154933    | 0.040734425 | 6.209726        | up                | 239849                | Cd200r4       |
| A_55_P1968078    | 0.0309128   | 5.3137326       | up                | 269109                | Dpp10         |
| A_52_P622667     | 0.04698343  | 5.2924924       | up                | 75300                 | 4930548F15Rik |
| A_51_P304478     | 0.028914226 | 5.2438664       | up                | 270028                | Fam155a       |
| A_51_P363187     | 0.041922424 | 5.223882        | up                | 14825                 | Cxcl1         |
| A_55_P2350710    | 0.03724817  | 5.1480927       | up                | unknown               | unknown       |
| A_52_P258617     | 0.005367049 | 5.1299367       | up                | 17079                 | Cd180         |
| A_55_P2185000    | 0.015237055 | 4.998701        | up                | 72065                 | Rap2c         |
| A_55_P1953758    | 0.01608326  | 4.9926405       | up                | 230779                | Serinc2       |
| A_51_P241068     | 0.011512839 | 4.8305373       | up                | 56811                 | Dkk2          |
| A_51_P454873     | 0.008715192 | 4.591792        | up                | 109648                | Npy           |
| A_51_P461319     | 0.010853741 | 4.5736413       | up                | 67092                 | Gatm          |
| A_51_P128075     | 0.00890484  | 4.3971786       | up                | 69301                 | Tescl         |
| A_51_P246653     | 0.047535725 | 4.3486605       | up                | 56644                 | Clec7a        |
| A_55_P2230484    | 0.029416125 | 4.333681        | up                | 75958                 | 5033403F01Rik |
| A_55_P2067583    | 0.018470999 | 4.32177         | up                | 12514                 | Cd68          |
| A_55_P1984262    | 0.04379719  | 4.245508        | up                | 79455                 | Pdcl2         |
| A_55_P1957353    | 0.008730723 | 4.219927        | up                | unknown               | unknown       |
| A_51_P275454     | 0.030209051 | 4.218605        | up                | 20128                 | Trim30a       |
| A_55_P2053532    | 0.020991549 | 4.1950393       | up                | 242819                | Rundc3b       |
| A_55_P2046693    | 0.00312842  | 4.0943704       | up                | 11740                 | Slc25a5       |
| A_51_P468260     | 0.003079893 | 4.04279         | up                | 20203                 | S100b         |
| A_55_P2094262    | 0.02177802  | 4.0096984       | up                | 21990                 | Tph1          |
| A_51_P133884     | 0.023813922 | 3.9952018       | up                | 170786                | Cd209a        |
| A_52_P480044     | 0.000556209 | 3.9528449       | up                | 667597                | BC023105      |
| A_55_P2055063    | 0.03961769  | 3.9309678       | up                | 68995                 | Mcts1         |
| A_55_P2317730    | 0.048966106 | 3.826572        | up                | 70286                 | 2310067P03Rik |
| A_51_P279693     | 0.005365545 | 3.8041263       | up                | 13076                 | Cyp1a1        |
| A_55_P2057881    | 0.032142926 | 3.7899761       | up                | 71617                 | 9130011E15Rik |
| A_51_P170562     | 0.003372009 | 3.7382753       | up                | 71756                 | Cpn2          |
| A_55_P1956897    | 0.043850403 | 3.7054188       | up                | 574081                | Defb46        |
| A_55_P1984815    | 0.03947168  | 3.682672        | up                | 241727                | Snph          |
| A_55_P2039541    | 0.0434416   | 3.5888941       | up                | 76117                 | Arhgap15      |
| A_51_P164203     | 0.04683555  | 3.553887        | up                | 56520                 | Nme4          |
| A_51_P209327     | 0.003861398 | 3.5199928       | up                | 30878                 | Apln          |



|               |             |           |    |           |               |
|---------------|-------------|-----------|----|-----------|---------------|
| A_52_P623511  | 0.035699442 | 3.4919183 | up | 100042512 | Gm3877        |
| A_55_P2006499 | 0.02531045  | 3.4900794 | up | 26381     | Esrrg         |
| A_55_P2472435 | 4.65072E-05 | 3.441332  | up | 55932     | Gbp3          |
| A_52_P300376  | 0.025017247 | 3.4256492 | up | 213742    | Xist          |
| A_55_P2069197 | 0.045313142 | 3.347283  | up | 387352    | Tas2r125      |
| A_55_P2126557 | 0.032374784 | 3.2908635 | up | unknown   | unknown       |
| A_51_P155723  | 0.04013059  | 3.2466013 | up | 27405     | Abcg3         |
| A_55_P1985239 | 0.01165134  | 3.206714  | up | 69352     | Necab1        |
| A_52_P35072   | 0.024097955 | 3.1915276 | up | 668408    | 1700084K02Rik |
| A_51_P103222  | 0.040311474 | 3.180983  | up | 72027     | Slc39a4       |
| A_55_P2077368 | 0.02412998  | 3.1513274 | up | 319446    | Dpep2         |
| A_55_P2106440 | 0.042023487 | 3.1331503 | up | unknown   | unknown       |
| A_55_P2119263 | 0.017465679 | 3.1298544 | up | unknown   | unknown       |
| A_55_P2009375 | 0.008165068 | 3.1272662 | up | 18557     | Cdk18         |
| A_55_P2035623 | 0.032914773 | 3.1226034 | up | 243963    | Zfp473        |
| A_51_P210956  | 0.011301947 | 3.0950074 | up | 22329     | Vcam1         |
| A_51_P286748  | 0.019359628 | 3.063156  | up | 20378     | Frzb          |
| A_55_P1962400 | 0.016647352 | 3.0623827 | up | 16181     | Il1rn         |
| A_55_P2072816 | 0.019117346 | 3.007732  | up | 245684    | Cnksr2        |
| A_55_P2241553 | 0.047021598 | 2.9521923 | up | 100689704 | 9330133O14Rik |
| A_51_P236267  | 0.03945416  | 2.942745  | up | 20452     | St8sia4       |
| A_55_P2170953 | 0.045423012 | 2.9404774 | up | unknown   | unknown       |
| A_55_P2063654 | 0.02876305  | 2.8701584 | up | 381530    | Mup20         |
| A_55_P2296641 | 0.031239254 | 2.8638194 | up | 74672     | 4930449A18Rik |
| A_51_P302181  | 0.002274608 | 2.8605325 | up | 83813     | Tnk1          |
| A_52_P520495  | 0.017399061 | 2.8501952 | up | 22329     | Vcam1         |
| A_55_P1962766 | 0.024083316 | 2.8326273 | up | 277743    | Fam131c       |
| A_55_P2004447 | 0.021743901 | 2.828154  | up | 234199    | Fgl1          |
| A_55_P1955931 | 0.03226132  | 2.8075843 | up | 73095     | Slc25a42      |
| A_55_P1964247 | 0.038869355 | 2.7931912 | up | unknown   | unknown       |
| A_66_P100284  | 0.047623623 | 2.73436   | up | 100039736 | A430060F13Rik |
| A_55_P2026139 | 0.012940364 | 2.7317605 | up | 381680    | Nxpe5         |
| A_66_P132825  | 0.03295673  | 2.69237   | up | unknown   | unknown       |
| A_55_P2128068 | 0.026557067 | 2.6916502 | up | unknown   | unknown       |
| A_51_P196925  | 0.03813867  | 2.680274  | up | 20312     | Cx3cl1        |
| A_51_P354744  | 0.005033741 | 2.6524894 | up | 226139    | Cox15         |
| A_55_P2004168 | 0.0333444   | 2.603626  | up | unknown   | unknown       |
| A_51_P239166  | 0.040161207 | 2.6027062 | up | 56622     | Adam21        |
| A_66_P111090  | 0.026383657 | 2.5926566 | up | 319229    | Sctr          |
| A_55_P1984243 | 0.016010102 | 2.5654674 | up | 17948     | Naip2         |
| A_55_P2312532 | 0.006061391 | 2.562299  | up | 101769    | AU023617      |
| A_51_P346938  | 0.01721557  | 2.559332  | up | 76905     | Lrg1          |
| A_52_P282741  | 0.022040052 | 2.5564668 | up | 20970     | Sdc3          |

|               |             |           |    |           |               |
|---------------|-------------|-----------|----|-----------|---------------|
| A_51_P364485  | 0.004587128 | 2.5560002 | up | 21928     | Tnfaip2       |
| A_55_P2012989 | 0.04921939  | 2.544938  | up | 75345     | Slamf7        |
| A_51_P338443  | 0.014924821 | 2.541999  | up | 57875     | Angptl4       |
| A_55_P1973279 | 0.018423704 | 2.5357826 | up | unknown   | unknown       |
| A_55_P2092310 | 0.010213793 | 2.5322466 | up | 236539    | Phgdh         |
| A_55_P2096917 | 0.04812036  | 2.532236  | up | 381269    | Mreg          |
| A_55_P1984416 | 0.014690093 | 2.5270193 | up | unknown   | unknown       |
| A_55_P2112642 | 0.015213939 | 2.5263479 | up | 22095     | Tshr          |
| A_55_P2037613 | 0.03113549  | 2.5138779 | up | 238317    | Elmsan1       |
| A_55_P1968245 | 0.02284636  | 2.5138156 | up | 14325     | Ftl1          |
| A_55_P1965368 | 0.031910896 | 2.507902  | up | 68964     | Ctc1          |
| A_55_P1972582 | 0.04831336  | 2.5078235 | up | 240921    | Gm4955        |
| A_55_P2015169 | 0.02385201  | 2.5064943 | up | unknown   | unknown       |
| A_52_P547662  | 0.024957659 | 2.5007973 | up | 18441     | P2ry1         |
| A_55_P2033650 | 0.004920321 | 2.4731076 | up | 12896     | Cpt2          |
| A_52_P52618   | 0.022852102 | 2.4707537 | up | 12983     | Csf2rb        |
| A_55_P2021659 | 0.013369442 | 2.4625342 | up | 74610     | Abcb8         |
| A_55_P1980426 | 0.0328923   | 2.4310877 | up | 18111     | Nnat          |
| A_55_P1959863 | 0.028833413 | 2.4274862 | up | unknown   | unknown       |
| A_55_P1989767 | 0.04968325  | 2.4261076 | up | 100042656 | Gm3952        |
| A_51_P405638  | 0.012202355 | 2.4243295 | up | unknown   | unknown       |
| A_55_P2132626 | 0.021819005 | 2.4219851 | up | unknown   | unknown       |
| A_66_P122781  | 0.01115184  | 2.420465  | up | 268319    | BC025920      |
| A_55_P2066116 | 0.002826603 | 2.411398  | up | 12051     | Bcl3          |
| A_51_P304170  | 0.008278701 | 2.409842  | up | 67775     | Rtp4          |
| A_52_P623226  | 0.038927548 | 2.3968885 | up | 14344     | Fut2          |
| A_55_P1973995 | 0.026997153 | 2.3954573 | up | 627427    | Gm6756        |
| A_52_P97572   | 0.01776409  | 2.3884819 | up | 23796     | Aplnr         |
| A_55_P2018412 | 0.026621796 | 2.3882632 | up | 320558    | Sycp2         |
| A_51_P514029  | 0.042780545 | 2.381031  | up | 17228     | Cma1          |
| A_65_P17218   | 0.015489441 | 2.3785565 | up | 100040464 | Mndal         |
| A_55_P2273656 | 0.02539133  | 2.3694644 | up | unknown   | unknown       |
| A_51_P369862  | 0.03298347  | 2.3680797 | up | 320024    | Nceh1         |
| A_55_P2115981 | 0.001495549 | 2.3680742 | up | 27084     | Xlr5c         |
| A_55_P1960999 | 0.033409998 | 2.3661308 | up | 18703     | Pigr          |
| A_55_P2099750 | 0.01373058  | 2.3596137 | up | unknown   | unknown       |
| A_55_P2273929 | 0.04164725  | 2.348326  | up | 330108    | Gm20558       |
| A_55_P2058812 | 0.036225017 | 2.3447452 | up | 67030     | Fanci1        |
| A_55_P1980237 | 0.03506632  | 2.33826   | up | 102632    | Acad11        |
| A_55_P2033780 | 0.031219523 | 2.3373573 | up | 14077     | Fabp3         |
| A_66_P119034  | 0.023960907 | 2.3339715 | up | 27226     | Pla2g7        |
| A_52_P90363   | 0.009038393 | 2.3280945 | up | 76933     | Ifi2712a      |
| A_55_P2148333 | 0.049886998 | 2.325698  | up | 69944     | 2810021J22Rik |

|               |             |           |    |           |               |
|---------------|-------------|-----------|----|-----------|---------------|
| A_51_P128463  | 0.001507823 | 2.3247635 | up | 72690     | Grrp1         |
| A_55_P2161400 | 0.026398655 | 2.323082  | up | 319229    | Sctr          |
| A_51_P477458  | 0.019334232 | 2.3133683 | up | 14804     | Grid2         |
| A_55_P2144456 | 0.036116224 | 2.3094978 | up | 225888    | Suv420h1      |
| A_55_P1975370 | 0.01679943  | 2.304937  | up | 11812     | Apoc1         |
| A_66_P114784  | 0.011915872 | 2.2910724 | up | 27226     | Pla2g7        |
| A_52_P93910   | 0.018065158 | 2.289967  | up | 18187     | Nrp2          |
| A_55_P1965882 | 0.044359222 | 2.2788634 | up | 67133     | Gp2           |
| A_55_P2000543 | 0.03023971  | 2.2699194 | up | 69142     | Cd209f        |
| A_55_P2041539 | 0.024599515 | 2.267068  | up | 72084     | Pigx          |
| A_55_P1983523 | 0.002685566 | 2.2605038 | up | 217305    | Cd300ld       |
| A_55_P2090835 | 0.012910369 | 2.2516289 | up | 668929    | Rad21l        |
| A_52_P116264  | 0.035204124 | 2.2509747 | up | 76187     | Adhfe1        |
| A_51_P161636  | 0.010151357 | 2.2429368 | up | 385643    | Kng2          |
| A_55_P2084283 | 0.023545582 | 2.2344277 | up | 100039952 | Gm581         |
| A_55_P2081462 | 0.04366323  | 2.2329564 | up | unknown   | unknown       |
| A_55_P2114143 | 0.02245103  | 2.228168  | up | 66832     | Rsph3a        |
| A_55_P1959938 | 0.001651314 | 2.2166774 | up | 29863     | Pde7b         |
| A_55_P2095311 | 0.026882017 | 2.208151  | up | 546644    | Ly6g          |
| A_51_P178772  | 0.022451349 | 2.2010272 | up | 234564    | Ces1f         |
| A_51_P359636  | 0.007052681 | 2.2003767 | up | 19039     | Lgals3bp      |
| A_66_P100496  | 0.032784443 | 2.1986833 | up | 73526     | Speer4b       |
| A_55_P2151116 | 0.026731754 | 2.1941268 | up | 216001    | Micu1         |
| A_55_P2141699 | 0.02525764  | 2.1892893 | up | 67702     | Rnf149        |
| A_55_P1978927 | 0.011771943 | 2.1854382 | up | 117600    | Srgap1        |
| A_55_P2069480 | 0.022922821 | 2.1837528 | up | unknown   | unknown       |
| A_55_P1966833 | 0.003900858 | 2.1811943 | up | 327959    | Xaf1          |
| A_55_P2026614 | 0.037938036 | 2.1706357 | up | unknown   | unknown       |
| A_55_P2140745 | 0.029643333 | 2.1668842 | up | unknown   | unknown       |
| A_51_P214269  | 0.034306634 | 2.161458  | up | 13835     | Epha1         |
| A_52_P198898  | 0.009658755 | 2.161073  | up | 320825    | Samd5         |
| A_55_P2110743 | 0.04241234  | 2.1587713 | up | 393082    | Mettl7a2      |
| A_55_P2004507 | 0.030344062 | 2.1565373 | up | 15950     | Ifi203        |
| A_55_P1994773 | 0.020364463 | 2.1558022 | up | 100042784 | Gm16381       |
| A_51_P207153  | 0.000938668 | 2.1557894 | up | 73737     | 1110008P14Rik |
| A_66_P122086  | 0.005391482 | 2.1554174 | up | 105892    | 9030619P08Rik |
| A_52_P183038  | 0.007086929 | 2.1539397 | up | 23917     | Impdh1        |
| A_51_P211854  | 0.021653045 | 2.1474924 | up | 20344     | Selp          |
| A_55_P2152304 | 0.01247126  | 2.1405215 | up | 71679     | Atp5h         |
| A_66_P127070  | 0.0321974   | 2.13673   | up | 14563     | Gdf5          |
| A_55_P2074796 | 0.003146816 | 2.1320302 | up | 12580     | Cdkn2c        |
| A_55_P2119613 | 0.012425814 | 2.1315558 | up | 71037     | Prss55        |
| A_55_P2101021 | 0.035336614 | 2.1289787 | up | 100470    | Lao1          |

|               |             |           |    |           |               |
|---------------|-------------|-----------|----|-----------|---------------|
| A_55_P2023912 | 0.043699194 | 2.124647  | up | unknown   | unknown       |
| A_55_P2029945 | 0.019290447 | 2.1240935 | up | unknown   | unknown       |
| A_55_P2035772 | 0.006187427 | 2.1191614 | up | 26565     | Pla2g10       |
| A_51_P386503  | 0.048231937 | 2.1185246 | up | 67477     | Abhd15        |
| A_52_P223809  | 0.033739008 | 2.117534  | up | 80861     | Dhx58         |
| A_55_P2073432 | 0.03358394  | 2.1129231 | up | 20890     | Wnt8a         |
| A_55_P1998601 | 0.041798722 | 2.1128073 | up | 228993    | Slc17a9       |
| A_55_P2022123 | 0.036919165 | 2.1082647 | up | 380709    | Spata22       |
| A_55_P2158592 | 0.002482493 | 2.1008945 | up | 320832    | Sirpb1a       |
| A_55_P2052485 | 0.020539246 | 2.0909472 | up | 234395    | Ushbp1        |
| A_51_P256202  | 0.011073636 | 2.0902686 | up | 64138     | Ctsz          |
| A_52_P484956  | 0.006802814 | 2.0882976 | up | 18111     | Nnat          |
| A_55_P1953063 | 0.006051819 | 2.0864136 | up | 15528     | Hspe1         |
| A_55_P2055087 | 0.04376721  | 2.084407  | up | 19088     | Prkar2b       |
| A_55_P2075692 | 0.011896908 | 2.0833895 | up | 226025    | Trpm3         |
| A_51_P309534  | 0.017590698 | 2.0742583 | up | 56273     | Pex14         |
| A_55_P1984168 | 0.018851578 | 2.070067  | up | 12363     | Casp4         |
| A_55_P1973723 | 0.019624356 | 2.0664158 | up | 66841     | Etfdh         |
| A_55_P2015687 | 0.037229303 | 2.0660286 | up | 219132    | Phf11d        |
| A_55_P1991773 | 0.039708514 | 2.0593126 | up | 54167     | Icos          |
| A_55_P1985850 | 0.04247972  | 2.0563192 | up | 21857     | Timp1         |
| A_55_P1969251 | 0.044733945 | 2.0445273 | up | 54607     | Socs6         |
| A_55_P2010048 | 0.044077646 | 2.0437882 | up | 100040352 | 2810416G20Rik |
| A_55_P2133370 | 0.03651179  | 2.0423667 | up | 100043728 | Gm4610        |
| A_51_P269084  | 0.015994722 | 2.0413504 | up | 103172    | Chchd10       |
| A_55_P2048912 | 0.012918615 | 2.035696  | up | 230787    | Themis2       |
| A_55_P2124346 | 0.0379883   | 2.035425  | up | 117198    | Ivns1abp      |
| A_55_P2364768 | 0.014896594 | 2.0349605 | up | 17223     | Mcpt-ps1      |
| A_52_P609109  | 0.023460018 | 2.0323677 | up | 71795     | Pitpnc1       |
| A_55_P2071751 | 0.046933923 | 2.0314403 | up | unknown   | unknown       |
| A_55_P1997766 | 0.007344226 | 2.030851  | up | 11433     | Acp5          |
| A_55_P2044547 | 0.03059977  | 2.0296483 | up | 100040352 | 2810416G20Rik |
| A_55_P2281891 | 0.036241744 | 2.0277634 | up | 242509    | Bnc2          |
| A_55_P2095498 | 0.013830009 | 2.0269701 | up | 16528     | Kcnk4         |
| A_51_P464918  | 0.024659347 | 2.0207765 | up | 54483     | Mefv          |
| A_51_P483483  | 0.022292726 | 2.0194538 | up | unknown   | unknown       |
| A_52_P584335  | 0.03732438  | 2.017755  | up | 14275     | Folr1         |
| A_52_P121960  | 0.01788441  | 2.0136852 | up | unknown   | unknown       |
| A_55_P2032768 | 0.036759336 | 2.009535  | up | unknown   | unknown       |
| A_55_P2118684 | 0.01620513  | 2.009426  | up | 269951    | Idh2          |
| A_51_P377452  | 0.03724348  | 2.0084043 | up | 17972     | Ncf4          |
| A_52_P475738  | 0.035908252 | 2.0057378 | up | 75805     | Nln           |
| A_51_P329949  | 0.002439679 | 2.001273  | up | 58909     | Fam13a        |

|               |             |           |      |           |               |
|---------------|-------------|-----------|------|-----------|---------------|
| A_51_P202331  | 0.031255517 | 7.6572948 | down | 18843     | Bpifa1        |
| A_55_P2079269 | 0.00440951  | 5.486639  | down | unknown   | unknown       |
| A_55_P1994739 | 0.014814098 | 4.6729183 | down | unknown   | unknown       |
| A_55_P2103001 | 0.006502333 | 4.636288  | down | unknown   | unknown       |
| A_55_P1995580 | 0.025260188 | 4.2711887 | down | 17232     | Mcpt9         |
| A_51_P346565  | 0.014681984 | 4.1693983 | down | 237979    | Sdk2          |
| A_55_P2126441 | 0.033518147 | 4.042017  | down | 75657     | Speer4a       |
| A_55_P2243162 | 0.016519992 | 3.6924362 | down | unknown   | unknown       |
| A_55_P2191303 | 0.001593046 | 3.6259832 | down | unknown   | unknown       |
| A_55_P2114959 | 0.043359816 | 3.4325883 | down | 100038864 | Btnl1         |
| A_55_P2099881 | 0.030040398 | 3.412374  | down | 100038480 | Gm10461       |
| A_52_P117408  | 0.025265183 | 3.3665097 | down | 21819     | Tg            |
| A_55_P2066214 | 0.02178445  | 3.360974  | down | unknown   | unknown       |
| A_55_P2006385 | 0.026010714 | 3.3271277 | down | 545475    | Defb28        |
| A_51_P133638  | 0.039128315 | 3.167933  | down | 67289     | 3110021A11Rik |
| A_55_P1984401 | 0.018641414 | 3.1141481 | down | 210274    | Shank2        |
| A_55_P2011096 | 0.023785863 | 3.0995102 | down | 76758     | Gsdma2        |
| A_55_P1977451 | 0.030442294 | 2.9830418 | down | unknown   | unknown       |
| A_55_P2119917 | 0.031079613 | 2.9718652 | down | 22781     | Ikzf4         |
| A_52_P468683  | 3.27028E-05 | 2.9708135 | down | 235599    | 6430571L13Rik |
| A_55_P1955602 | 0.045019343 | 2.945545  | down | unknown   | unknown       |
| A_55_P2126528 | 0.025554769 | 2.9330158 | down | unknown   | unknown       |
| A_55_P2173039 | 0.023144877 | 2.9307976 | down | unknown   | unknown       |
| A_55_P1963221 | 0.009599702 | 2.8623981 | down | unknown   | unknown       |
| A_55_P2133943 | 0.03997427  | 2.8491256 | down | 101056064 | LOC101056066  |
| A_51_P201174  | 0.015308277 | 2.7984986 | down | 67717     | Lipf          |
| A_55_P2044232 | 0.024074197 | 2.7781916 | down | 241877    | Slc10a5       |
| A_55_P2410463 | 0.000292941 | 2.7454906 | down | 98087     | C87487        |
| A_55_P2186978 | 0.006922412 | 2.7305107 | down | unknown   | unknown       |
| A_55_P2058040 | 0.00017882  | 2.6976464 | down | unknown   | unknown       |
| A_55_P2060897 | 0.039009877 | 2.6701639 | down | unknown   | unknown       |
| A_52_P88007   | 0.021873903 | 2.656091  | down | 240332    | Slc6a7        |
| A_55_P2055970 | 0.04857904  | 2.649529  | down | unknown   | unknown       |
| A_55_P2145224 | 0.047457587 | 2.6447887 | down | unknown   | unknown       |
| A_55_P2065510 | 0.04002854  | 2.6179883 | down | unknown   | unknown       |
| A_55_P2090265 | 0.006611924 | 2.5945392 | down | 319555    | Nwd1          |
| A_55_P1968799 | 0.021759612 | 2.5923593 | down | 69664     | Krtap1-5      |
| A_55_P2108221 | 0.033530883 | 2.5824623 | down | unknown   | unknown       |
| A_55_P2335878 | 0.01586151  | 2.572494  | down | 77813     | A930012N16Rik |
| A_52_P213483  | 0.021483103 | 2.5461378 | down | 619994    | Ighv1-77      |
| A_51_P245202  | 0.005832666 | 2.5343828 | down | unknown   | unknown       |
| A_55_P2053923 | 0.0016555   | 2.5257208 | down | 19329     | Rab17         |
| A_51_P483576  | 0.021697117 | 2.5185776 | down | unknown   | unknown       |

|               |             |           |      |           |               |
|---------------|-------------|-----------|------|-----------|---------------|
| A_55_P2166618 | 0.017512461 | 2.5181432 | down | unknown   | unknown       |
| A_55_P2088113 | 0.012783063 | 2.5147479 | down | 100038592 | Gm16287       |
| A_52_P662711  | 0.044325747 | 2.511018  | down | 69787     | Anxa13        |
| A_52_P534001  | 0.021442037 | 2.507867  | down | 74708     | Pih1d3        |
| A_55_P1958227 | 0.037325732 | 2.4807858 | down | unknown   | unknown       |
| A_51_P230734  | 0.016764158 | 2.4642513 | down | 142681    | Slc34a3       |
| A_55_P1988994 | 0.025150066 | 2.458563  | down | unknown   | unknown       |
| A_52_P270429  | 0.044121213 | 2.445454  | down | 69134     | Fam25c        |
| A_55_P2031851 | 0.021446884 | 2.4425776 | down | unknown   | unknown       |
| A_55_P2213214 | 0.009114099 | 2.4409592 | down | 100126240 | A030001D20Rik |
| A_66_P124420  | 0.006866672 | 2.423194  | down | unknown   | unknown       |
| A_55_P2003911 | 0.013248686 | 2.4227715 | down | unknown   | unknown       |
| A_55_P2255206 | 0.000331767 | 2.415714  | down | 319782    | A730021G18Rik |
| A_55_P2116853 | 0.041127652 | 2.4116418 | down | 78783     | Brpf1         |
| A_55_P2047043 | 0.018602936 | 2.4042046 | down | 228785    | Mylk2         |
| A_52_P374983  | 0.02728542  | 2.4030964 | down | 320377    | 9330175E14Rik |
| A_55_P1985814 | 0.024032002 | 2.39653   | down | unknown   | unknown       |
| A_55_P1957144 | 0.024472598 | 2.3762164 | down | 217169    | Tns4          |
| A_52_P384036  | 0.018876197 | 2.375959  | down | 271813    | Agbl2         |
| A_55_P2179884 | 0.03272248  | 2.3512454 | down | unknown   | unknown       |
| A_51_P468073  | 0.043852445 | 2.3508759 | down | 14598     | Ggt1          |
| A_52_P442169  | 0.020081572 | 2.3049946 | down | 12217     | Bsn           |
| A_55_P2148726 | 0.03631526  | 2.2980077 | down | unknown   | unknown       |
| A_55_P2086193 | 0.027911872 | 2.2975194 | down | 60613     | Kcnq4         |
| A_66_P130241  | 0.009273455 | 2.293709  | down | 13358     | Slc25a1       |
| A_55_P2009430 | 0.03612608  | 2.2680302 | down | 101056104 | LOC101056101  |
| A_51_P496720  | 0.03713821  | 2.2667727 | down | 54427     | Dnmt3l        |
| A_55_P2300421 | 0.032299157 | 2.2643816 | down | 319875    | Tmprss11bnl   |
| A_55_P2002954 | 0.000458747 | 2.2522793 | down | unknown   | unknown       |
| A_51_P230142  | 0.044258393 | 2.251463  | down | 68243     | A930018P22Rik |
| A_55_P2047196 | 0.000153995 | 2.2453992 | down | 75641     | 1700029I15Rik |
| A_55_P2169431 | 0.025901236 | 2.2400284 | down | unknown   | unknown       |
| A_55_P2072881 | 0.034041513 | 2.2375202 | down | unknown   | unknown       |
| A_55_P1989076 | 0.046067115 | 2.231466  | down | 73102     | Slc22a23      |
| A_51_P340170  | 0.020352589 | 2.2196074 | down | 237313    | Il20ra        |
| A_55_P2032458 | 0.019200377 | 2.217785  | down | 628919    | Gm6934        |
| A_55_P2154994 | 0.029733976 | 2.2170353 | down | 77917     | A030014E15Rik |
| A_52_P567200  | 0.026564317 | 2.206506  | down | 237178    | Ppef1         |
| A_55_P2076826 | 0.007595602 | 2.201091  | down | 320189    | 9430076C15Rik |
| A_55_P2037643 | 0.019085467 | 2.185478  | down | unknown   | unknown       |
| A_55_P1976574 | 0.049756996 | 2.183924  | down | 50874     | Tmod4         |
| A_55_P1983253 | 0.018878039 | 2.1786005 | down | unknown   | unknown       |
| A_51_P197680  | 0.021271529 | 2.174422  | down | 70515     | 5730407I07Rik |

|               |             |           |      |           |               |
|---------------|-------------|-----------|------|-----------|---------------|
| A_52_P684179  | 0.017711962 | 2.1713197 | down | 66779     | 4933432I09Rik |
| A_52_P330111  | 0.028130854 | 2.1640189 | down | 75136     | Rsph10b2      |
| A_55_P2084855 | 0.015315488 | 2.1618073 | down | 381922    | D830044I16Rik |
| A_55_P2127194 | 0.034788437 | 2.1586893 | down | unknown   | unknown       |
| A_55_P2082403 | 0.008919989 | 2.1568027 | down | 20473     | Six3          |
| A_52_P22781   | 0.019874422 | 2.1557739 | down | 330788    | Zfp866        |
| A_52_P105765  | 0.001277731 | 2.1536753 | down | 240505    | Cdc42bpg      |
| A_55_P2089472 | 0.048422836 | 2.1494179 | down | 75656     | 1700020A23Rik |
| A_55_P2344804 | 0.019417379 | 2.1428874 | down | 97028     | C87490        |
| A_55_P2020090 | 0.032266323 | 2.142365  | down | 245631    | Mum111        |
| A_55_P2142990 | 0.030027848 | 2.1320937 | down | 100503312 | Pifo          |
| A_66_P130730  | 0.009548812 | 2.1169531 | down | 620419    | Zfp963        |
| A_55_P2056580 | 0.033821307 | 2.116641  | down | unknown   | unknown       |
| A_55_P1954061 | 0.011704716 | 2.114691  | down | 18190     | Nrxn2         |
| A_55_P1957867 | 0.016407108 | 2.1137652 | down | 100041144 | Gm3161        |
| A_51_P209818  | 0.008810632 | 2.113711  | down | 19152     | Prtn3         |
| A_55_P2056443 | 0.020867284 | 2.1130006 | down | 100182    | Akna          |
| A_52_P650037  | 0.005532681 | 2.1103785 | down | 243743    | Plxna4        |
| A_55_P2117092 | 0.04277561  | 2.106562  | down | unknown   | unknown       |
| A_55_P2075278 | 0.01667714  | 2.096321  | down | 71131     | Zfp689        |
| A_55_P2086198 | 0.019227259 | 2.0916715 | down | 60613     | Kcnq4         |
| A_55_P2088497 | 0.029133176 | 2.0901682 | down | 641235    | LOC641235     |
| A_55_P2317346 | 0.039405257 | 2.088493  | down | unknown   | unknown       |
| A_51_P414879  | 0.040188473 | 2.088178  | down | unknown   | unknown       |
| A_55_P2071646 | 0.005754638 | 2.0858612 | down | unknown   | unknown       |
| A_55_P1986665 | 0.008474236 | 2.0855317 | down | 258493    | Olfr319       |
| A_66_P132515  | 0.002603067 | 2.0829477 | down | 66371     | Chmp4c        |
| A_55_P2006629 | 0.04670997  | 2.0792224 | down | unknown   | unknown       |
| A_55_P2005898 | 0.011413094 | 2.0776815 | down | unknown   | unknown       |
| A_55_P2243237 | 0.008989604 | 2.0688028 | down | 102975    | AU015621      |
| A_66_P136778  | 0.046309486 | 2.0681882 | down | 332110    | Mapk15        |
| A_55_P2013559 | 0.001842453 | 2.065804  | down | 13483     | Dpp6          |
| A_55_P2131672 | 0.010677956 | 2.0636127 | down | 320878    | Mical2        |
| A_66_P126848  | 0.009278496 | 2.0605028 | down | 434729    | Gm5635        |
| A_55_P2177463 | 0.001163216 | 2.059919  | down | 434198    | B130024G19Rik |
| A_55_P2275999 | 0.026746618 | 2.0593078 | down | 100504352 | C78197        |
| A_51_P302520  | 0.004849006 | 2.054695  | down | 17929     | Myom1         |
| A_55_P2000369 | 0.016052974 | 2.0531092 | down | 11829     | Aqp4          |
| A_55_P2221107 | 0.028678203 | 2.0513802 | down | 77703     | 9230106L01Rik |
| A_55_P2133027 | 0.036322895 | 2.0475428 | down | 67703     | Kirrel3       |
| A_66_P124776  | 0.018997245 | 2.04497   | down | 101056432 | LOC101056428  |
| A_55_P2096602 | 0.03691907  | 2.0443246 | down | 78829     | Tsc22d4       |
| A_55_P1979477 | 0.040414736 | 2.0403657 | down | unknown   | unknown       |

|               |             |           |      |           |               |
|---------------|-------------|-----------|------|-----------|---------------|
| A_55_P2122300 | 0.025178948 | 2.0379837 | down | 66935     | Cir1          |
| A_51_P175580  | 0.03223037  | 2.0339873 | down | 60599     | Trp53inp1     |
| A_55_P2410626 | 0.01283084  | 2.0325806 | down | 319285    | A430061O12Rik |
| A_52_P223127  | 0.015601805 | 2.0304494 | down | 118449    | Synpo2        |
| A_55_P1975937 | 0.012108337 | 2.0295537 | down | unknown   | unknown       |
| A_55_P1966239 | 0.021343568 | 2.0288959 | down | 27205     | Podxl         |
| A_55_P2066894 | 0.012908251 | 2.0206168 | down | unknown   | unknown       |
| A_55_P2040227 | 0.014465137 | 2.0175316 | down | 627626    | Ptchd4        |
| A_65_P16483   | 0.009964675 | 2.016442  | down | 59020     | Pdzk1         |
| A_55_P1953013 | 0.039945114 | 2.014867  | down | 232035    | Ccser1        |
| A_55_P2042341 | 0.012612159 | 2.0137198 | down | 258768    | Olf1189       |
| A_55_P1993089 | 0.044883043 | 2.0101953 | down | 100043680 | Gm4583        |
| A_55_P2081652 | 0.019330632 | 2.00956   | down | 232836    | Galp          |
| A_55_P1979768 | 0.002832676 | 2.0093908 | down | 15405     | Hoxa9         |
| A_55_P2158251 | 0.028082196 | 2.0065305 | down | 14807     | Grik3         |
| A_55_P2045002 | 0.013045222 | 2.0054398 | down | 13859     | Eps1511       |
| A_51_P105887  | 0.00938716  | 2.0045881 | down | 240754    | Lax1          |

---



**Table-S3 Top 500 most correlated LncRNAs and mRNAs**

| <b>No</b> | <b>lncRNA</b>              | <b>correlated mRNA</b> | <b>p -Value</b> | <b>correlation</b> |
|-----------|----------------------------|------------------------|-----------------|--------------------|
| 1         | chr18_5813291_5813708_R    | Kirrel3                | 0.000100214     | -0.9918151         |
| 2         | chr4_88745771_88776323_F   | Mylk2                  | 0.000100263     | 0.99181313         |
| 3         | uc.427+                    | Dpp6                   | 0.000100461     | 0.99180505         |
| 4         | NR_073368.1                | Prtn3                  | 0.000100477     | -0.9918044         |
| 5         | FR155040                   | Mboat4                 | 0.000100553     | 0.9918013          |
| 6         | FR301809                   | LOC101056101           | 0.000100615     | -0.9917987         |
| 7         | NR_045899.1                | Icos                   | 0.000100615     | 0.99179873         |
| 8         | FR374009                   | Suv420h1               | 0.000100812     | 0.99179072         |
| 9         | FR043548                   | Gm16381                | 0.000100817     | 0.99179052         |
| 10        | n290305                    | Tescl                  | 0.000100916     | 0.99178648         |
| 11        | chr7_133402766_133415516_R | Rsph3a                 | 0.000100953     | -0.991785          |
| 12        | FR199374                   | 1700084K02Rik          | 0.000101151     | 0.99177689         |
| 13        | n412060                    | D830044I16Rik          | 0.000101217     | 0.99177422         |
| 14        | FR212572                   | Zfp689                 | 0.000101245     | 0.99177308         |
| 15        | chr1_183142656_183163206_R | Micul1                 | 0.000101304     | -0.9917707         |
| 16        | chr17_10057283_10075014_F  | Pigr                   | 0.000101329     | -0.9917697         |
| 17        | chr9_67414463_67483185_R   | Zfp689                 | 0.000101623     | 0.9917577          |
| 18        | chr1_75075500_75102200_R   | Abcg3                  | 0.000101638     | 0.99175712         |
| 19        | FR171433                   | Brpf1                  | 0.00010167      | -0.9917558         |
| 20        | FR268824                   | Bnc2                   | 0.000101794     | 0.99175075         |
| 21        | FR279620                   | LOC101056066           | 0.000101824     | -0.9917496         |
| 22        | FR114000                   | Defb46                 | 0.000101832     | 0.99174923         |
| 23        | chr1_138473514_138476054_R | A930018P22Rik          | 0.000101967     | 0.99174375         |
| 24        | NR_033641.2                | Bnc2                   | 0.000102028     | 0.99174129         |
| 25        | FR392828                   | Mreg                   | 0.000102058     | 0.99174006         |
| 26        | Gomafu                     | Pih1d3                 | 0.000102072     | -0.9917395         |
| 27        | FR298560                   | Suv420h1               | 0.000102097     | -0.9917385         |
| 28        | FR120704                   | A430060F13Rik          | 0.000102291     | 0.99173063         |
| 29        | FR035623                   | Btnl1                  | 0.000102343     | 0.99172851         |
| 30        | FR042390                   | Slc6a7                 | 0.000102381     | -0.991727          |
| 31        | FR215148                   | Mettl7a2               | 0.000102551     | 0.99172013         |
| 32        | chr10_18036490_18059965_F  | Pla2g10                | 0.00010256      | 0.99171976         |
| 33        | FR312820                   | Agbl2                  | 0.000102603     | 0.99171799         |
| 34        | FR168758                   | Fam25c                 | 0.000102923     | 0.99170508         |
| 35        | NR_045899.1                | Ushbp1                 | 0.000102956     | 0.99170377         |
| 36        | FR168142                   | Snph                   | 0.00010296      | 0.99170361         |
| 37        | chr13_48576557_48581632_F  | Btnl1                  | 0.00010297      | 0.99170317         |
| 38        | FR298560                   | 9330175E14Rik          | 0.00010297      | 0.9917032          |
| 39        | FR152607                   | Tmprss11bnl            | 0.000103012     | 0.99170149         |
| 40        | chr3_35782698_35789932_R   | Ighv1-77               | 0.000103415     | 0.99168525         |
| 41        | FR139436                   | Grik3                  | 0.000103494     | 0.99168206         |

|    |                             |               |             |            |
|----|-----------------------------|---------------|-------------|------------|
| 42 | n296710                     | LOC101056428  | 0.000103523 | 0.99168093 |
| 43 | FR029778                    | Kcnq4         | 0.000103559 | 0.99167947 |
| 44 | chr16_59557120_59602070_R   | Nme4          | 0.000103605 | -0.9916776 |
| 45 | FR136228                    | Fam155a       | 0.000103624 | 0.99167684 |
| 46 | n413982                     | Ikzf4         | 0.000103643 | -0.9916761 |
| 47 | FR185165                    | Ikzf4         | 0.000103769 | 0.99167103 |
| 48 | FR212572                    | Agbl2         | 0.000103848 | 0.99166785 |
| 49 | FR052210                    | 5033403F01Rik | 0.000104026 | -0.9916607 |
| 50 | n412060                     | Dnmt3l        | 0.00010443  | 0.9916445  |
| 51 | FR155648                    | Kcnk4         | 0.000104497 | 0.9916418  |
| 52 | ENSMUST00000125250          | Akna          | 0.000104806 | 0.99162945 |
| 53 | chr3_86827945_86886695_R    | Epha1         | 0.000105014 | 0.99162114 |
| 54 | chr15_78403377_78412545_F   | Snph          | 0.000105218 | -0.991613  |
| 55 | FR064590                    | Anxa13        | 0.000105229 | 0.99161253 |
| 56 | FR186619                    | LOC101056101  | 0.000105419 | -0.991605  |
| 57 | FR011959                    | Gm16381       | 0.000105674 | -0.9915948 |
| 58 | chr8_123901815_123902167_R  | Pitpnc1       | 0.000105739 | 0.99159222 |
| 59 | FR092975                    | A930018P22Rik | 0.000105824 | -0.9915888 |
| 60 | FR117744                    | Lrp2          | 0.000105886 | 0.99158637 |
| 61 | Gomafu                      | Lao1          | 0.000105949 | 0.99158386 |
| 62 | chr1_162965001_162966376_F  | Slc39a4       | 0.000106006 | -0.9915816 |
| 63 | FR121241                    | LOC101056428  | 0.000106291 | 0.99157028 |
| 64 | chr11_116936834_116948799_R | Anxa13        | 0.000106648 | 0.99155611 |
| 65 | chrX_165792277_165807952_R  | Dpp6          | 0.000106725 | 0.99155305 |
| 66 | chr2_158169020_158191295_F  | Prtn3         | 0.000106772 | 0.99155121 |
| 67 | FR185165                    | LOC101056066  | 0.000106798 | 0.99155015 |
| 68 | FR254927                    | Slc6a7        | 0.000106819 | -0.9915493 |
| 69 | FR155040                    | 9130011E15Rik | 0.000107011 | 0.99154172 |
| 70 | chr4_116790373_116797823_F  | LOC101056428  | 0.000107043 | 0.99154048 |
| 71 | chr15_78403377_78412545_F   | Mcts1         | 0.000107096 | -0.9915384 |
| 72 | FR011959                    | Pigr          | 0.000107222 | -0.9915334 |
| 73 | FR184042                    | 6430571L13Rik | 0.000107259 | 0.99153191 |
| 74 | chr9_56646768_56649068_R    | Ushbp1        | 0.000107385 | -0.9915269 |
| 75 | FR150621                    | Rundc3b       | 0.000107423 | 0.99152544 |
| 76 | chr15_78403377_78412545_F   | 9130011E15Rik | 0.000107424 | -0.9915254 |
| 77 | chr5_149751979_149808240_F  | D830044I16Rik | 0.000107453 | 0.99152427 |
| 78 | chr4_35106125_35127700_F    | 9230106L01Rik | 0.000107476 | 0.99152333 |
| 79 | FR100940                    | Micu1         | 0.000107621 | -0.9915176 |
| 80 | chr4_116790373_116797823_F  | Zfp866        | 0.000107661 | 0.99151605 |
| 81 | n294011                     | 9230106L01Rik | 0.000107914 | 0.99150606 |
| 82 | chr7_82902248_82955248_F    | A930012N16Rik | 0.00010807  | -0.9914999 |
| 83 | FR208702                    | Sycp2         | 0.000108176 | 0.99149573 |
| 84 | FR055065                    | LOC101056428  | 0.000108212 | 0.99149432 |

|     |                            |               |             |            |
|-----|----------------------------|---------------|-------------|------------|
| 85  | chr8_26345571_26346095_R   | Pdzk1         | 0.000108224 | 0.99149385 |
| 86  | n273521                    | Nme4          | 0.000108427 | 0.99148586 |
| 87  | chr14_55317199_55317670_R  | 1700084K02Rik | 0.000108645 | -0.9914773 |
| 88  | FR375498                   | Kirrel3       | 0.000108673 | 0.9914762  |
| 89  | ENSMUST00000155173         | Tns4          | 0.000108797 | 0.99147135 |
| 90  | FR112324                   | Socs6         | 0.000108865 | 0.99146868 |
| 91  | FR114000                   | LOC101056101  | 0.000108945 | -0.9914655 |
| 92  | FR171433                   | Mettl7a2      | 0.000108973 | 0.99146445 |
| 93  | FR294279                   | Gm10461       | 0.00010915  | 0.99145749 |
| 94  | FR060087                   | Cd68          | 0.000109351 | 0.99144962 |
| 95  | FR289473                   | Suv420h1      | 0.000109696 | 0.99143613 |
| 96  | chr9_66976750_67014625_F   | Aplnr         | 0.000109775 | -0.991433  |
| 97  | FR278883                   | Bcl3          | 0.000109817 | 0.99143138 |
| 98  | FR001172                   | Mapk15        | 0.000109845 | -0.9914303 |
| 99  | n415399                    | Frzb          | 0.00010998  | 0.99142503 |
| 100 | FR285140                   | Mettl7a2      | 0.000109985 | -0.9914248 |
| 101 | FR005836                   | Tns4          | 0.000110064 | 0.99142173 |
| 102 | FR398266                   | Dpp10         | 0.000110283 | 0.9914132  |
| 103 | chrX_165792277_165807952_R | Tnk1          | 0.0001103   | -0.9914125 |
| 104 | FR237950                   | LOC101056428  | 0.000110329 | 0.99141141 |
| 105 | FR043548                   | Agbl2         | 0.000110359 | -0.9914102 |
| 106 | chr18_69923410_69965360_R  | Gm16381       | 0.000110388 | -0.9914091 |
| 107 | n414371                    | Tns4          | 0.000110423 | 0.99140773 |
| 108 | chr4_116790373_116797823_F | 4933432I09Rik | 0.000110501 | 0.9914047  |
| 109 | n294791                    | Podxl         | 0.000110562 | -0.9914023 |
| 110 | n418283                    | Mcpt9         | 0.000110643 | 0.99139919 |
| 111 | FR136228                   | Adam21        | 0.00011072  | 0.99139617 |
| 112 | FR323263                   | Slc25a5       | 0.000111014 | 0.99138477 |
| 113 | FR302003                   | C87490        | 0.000111087 | 0.99138191 |
| 114 | FR337786                   | Ushbp1        | 0.000111264 | -0.991375  |
| 115 | FR331566                   | Tns4          | 0.00011148  | 0.99136665 |
| 116 | FR139436                   | 9330175E14Rik | 0.000111485 | 0.99136648 |
| 117 | chrX_102568332_102587093_R | Agbl2         | 0.000111577 | 0.99136289 |
| 118 | n296070                    | Prtn3         | 0.000111595 | -0.9913622 |
| 119 | FR395572                   | 9130011E15Rik | 0.000111643 | -0.9913603 |
| 120 | FR312820                   | Gm581         | 0.000111739 | -0.9913566 |
| 121 | n343233                    | Slc25a1       | 0.000111967 | -0.9913478 |
| 122 | FR149067                   | Fanc1         | 0.00011199  | 0.99134692 |
| 123 | FR087735                   | Fanc1         | 0.000112379 | 0.99133187 |
| 124 | XR_140871.1                | Nrxn2         | 0.000112489 | -0.9913276 |
| 125 | n296710                    | A030014E15Rik | 0.000112538 | 0.99132575 |
| 126 | n415372                    | 4930548F15Rik | 0.000112606 | 0.9913231  |
| 127 | FR384764                   | 1110008P14Rik | 0.00011289  | 0.99131215 |

|     |                             |               |             |            |
|-----|-----------------------------|---------------|-------------|------------|
| 128 | FR019091                    | Bnc2          | 0.000112944 | 0.99131007 |
| 129 | FR064590                    | Gm6934        | 0.000112947 | 0.99130997 |
| 130 | chr19_23068397_23190256_R   | Elmsan1       | 0.000113098 | -0.9913042 |
| 131 | chr13_76326228_76332632_F   | Prtn3         | 0.00011314  | 0.99130253 |
| 132 | FR233225                    | Epha1         | 0.000113162 | 0.99130167 |
| 133 | n418309                     | Gm581         | 0.00011319  | -0.9913006 |
| 134 | FR042390                    | Lrp2          | 0.000113437 | 0.9912911  |
| 135 | n414371                     | LOC101056428  | 0.000113655 | 0.99128272 |
| 136 | FR030947                    | Bnc2          | 0.000113783 | 0.9912778  |
| 137 | chr1_196445304_196445818_R  | Mylk2         | 0.000113918 | 0.99127262 |
| 138 | FR199374                    | LOC101056101  | 0.000113962 | -0.991271  |
| 139 | chr2_158169020_158191295_F  | Zfp866        | 0.000114076 | 0.99126657 |
| 140 | FR194887                    | 9030619P08Rik | 0.000114156 | 0.99126349 |
| 141 | n420390                     | Tmprss11bnl   | 0.000114341 | 0.99125644 |
| 142 | n290305                     | Mcts1         | 0.000114498 | 0.99125039 |
| 143 | chr12_16873410_16873872_F   | Slc39a4       | 0.000114518 | -0.9912497 |
| 144 | chr3_86827945_86886695_R    | Fam155a       | 0.000114544 | 0.99124864 |
| 145 | FR087735                    | Ushbp1        | 0.000114606 | 0.99124627 |
| 146 | ENSMUST00000157205          | Slc10a5       | 0.000114742 | 0.99124107 |
| 147 | chr12_111287772_111333890_F | Ushbp1        | 0.000114996 | -0.9912314 |
| 148 | FR237950                    | Tmprss11bnl   | 0.000115055 | 0.99122911 |
| 149 | FR347914                    | Fut2          | 0.000115062 | 0.99122886 |
| 150 | FR162622                    | Zfp689        | 0.000115146 | 0.99122564 |
| 151 | FR029778                    | D830044I16Rik | 0.000115242 | 0.99122199 |
| 152 | chr10_8606683_8665783_R     | Lipf          | 0.00011528  | 0.99122054 |
| 153 | FR202182                    | LOC101056066  | 0.000115406 | -0.9912157 |
| 154 | chr1_183783306_183834531_F  | Cpt2          | 0.000115464 | -0.9912135 |
| 155 | FR047247                    | Tns4          | 0.000115495 | 0.99121233 |
| 156 | FR052210                    | Elmsan1       | 0.000115539 | -0.9912107 |
| 157 | FR366845                    | Sycp2         | 0.000115572 | 0.99120942 |
| 158 | FR005836                    | Gm16381       | 0.000115621 | -0.9912075 |
| 159 | chr2_157236070_157249445_R  | Aplnr         | 0.000115839 | 0.99119925 |
| 160 | ENSMUST00000139056          | Slc6a7        | 0.000115853 | -0.9911987 |
| 161 | Gomafu                      | LOC101056066  | 0.000115888 | -0.9911974 |
| 162 | uc.411+                     | Nme4          | 0.00011618  | 0.9911863  |
| 163 | FR100940                    | Defb46        | 0.000116231 | -0.9911843 |
| 164 | n265955                     | Krtap1-5      | 0.000116448 | 0.99117609 |
| 165 | FR029778                    | LOC101056428  | 0.00011648  | 0.99117488 |
| 166 | FR202182                    | Snph          | 0.000116624 | 0.99116943 |
| 167 | FR162485                    | LOC101056066  | 0.000116638 | -0.9911689 |
| 168 | chr15_96597330_96663683_F   | Zfp473        | 0.000116679 | -0.9911674 |
| 169 | chr3_86827945_86886695_R    | Sycp2         | 0.00011685  | 0.99116089 |
| 170 | chr12_16873410_16873872_F   | 5033403F01Rik | 0.000117158 | -0.9911492 |

|     |                             |               |             |            |
|-----|-----------------------------|---------------|-------------|------------|
| 171 | FR266999                    | Tescl         | 0.000117169 | -0.9911488 |
| 172 | FR121241                    | Gm16381       | 0.000117316 | -0.9911432 |
| 173 | FR019091                    | Fam155a       | 0.000117337 | 0.99114244 |
| 174 | chr12_110003268_110030953_F | Lrp2          | 0.000117382 | -0.9911408 |
| 175 | Gomafu                      | 9330133O14Rik | 0.000117421 | 0.99113927 |
| 176 | FR237950                    | Gm16381       | 0.000117458 | -0.9911379 |
| 177 | n416957                     | Fut2          | 0.000117474 | 0.99113726 |
| 178 | ENSMUST00000181887          | Prtn3         | 0.000117615 | 0.99113194 |
| 179 | n418283                     | Akna          | 0.000117744 | 0.99112708 |
| 180 | FR319563                    | Slc39a4       | 0.000117765 | 0.99112627 |
| 181 | FR168142                    | Slc39a4       | 0.000117799 | 0.99112498 |
| 182 | FR366845                    | Slc39a4       | 0.000117838 | 0.99112353 |
| 183 | chr8_41475940_41476460_F    | 1700084K02Rik | 0.000118227 | 0.99110887 |
| 184 | chr9_14480441_14483362_F    | Pifo          | 0.000118276 | 0.9911107  |
| 185 | FR185165                    | Pifo          | 0.000118279 | 0.99110691 |
| 186 | FR283931                    | Nme4          | 0.000118352 | -0.9911042 |
| 187 | chr3_35782698_35789932_R    | Bpifa1        | 0.000118462 | 0.99110003 |
| 188 | FR162485                    | Zfp473        | 0.00011855  | 0.99109673 |
| 189 | ENSMUST00000157205          | Tns4          | 0.000118571 | 0.99109591 |
| 190 | chr8_96983590_96994419_F    | Rtp4          | 0.000118626 | 0.99109387 |
| 191 | FR162622                    | Btnl1         | 0.000118637 | 0.99109344 |
| 192 | chr7_91558475_91733625_R    | Slc39a4       | 0.000118644 | -0.9910932 |
| 193 | FR171433                    | 4930548F15Rik | 0.000118655 | 0.99109278 |
| 194 | chr8_26345571_26346095_R    | D830044I16Rik | 0.00011866  | 0.99109258 |
| 195 | FR097477                    | Lao1          | 0.000118677 | -0.9910919 |
| 196 | FR199374                    | Gm4583        | 0.000118729 | -0.99109   |
| 197 | FR155040                    | Micu1         | 0.000118853 | 0.99108531 |
| 198 | chr12_111287772_111333890_F | Mettl7a2      | 0.000118917 | -0.9910829 |
| 199 | FR331566                    | Gm16381       | 0.000118956 | -0.9910814 |
| 200 | FR136228                    | Zfp473        | 0.000118996 | 0.99107997 |
| 201 | FR029778                    | A430061O12Rik | 0.000119056 | 0.9910777  |
| 202 | FR279905                    | Aqp4          | 0.000119121 | 0.99107528 |
| 203 | FR287008                    | Tmprss11bnl   | 0.000119183 | 0.99107292 |
| 204 | XR_104983.1                 | Snph          | 0.000119337 | 0.99106715 |
| 205 | FR007551                    | 1700029I15Rik | 0.00011938  | -0.9910656 |
| 206 | uc.31+                      | A430060F13Rik | 0.000119463 | -0.9910625 |
| 207 | chr1_183142656_183163206_R  | Snph          | 0.000119501 | -0.991061  |
| 208 | FR186619                    | Micu1         | 0.000119613 | 0.99105682 |
| 209 | FR301567                    | Lrp2          | 0.000119806 | 0.99104961 |
| 210 | chr14_105497388_105511063_F | Tmod4         | 0.00011988  | 0.99104685 |
| 211 | FR233225                    | 9130011E15Rik | 0.000120064 | 0.99103995 |
| 212 | chr14_105497388_105511063_F | Anxa13        | 0.000120165 | 0.99103619 |
| 213 | FR254927                    | Mcts1         | 0.000120254 | 0.99103284 |

|     |                             |               |             |            |
|-----|-----------------------------|---------------|-------------|------------|
| 214 | FR155040                    | Fam155a       | 0.000120281 | 0.99103185 |
| 215 | FR385633                    | Fut2          | 0.000120478 | -0.9910245 |
| 216 | FR032503                    | Suv420h1      | 0.00012048  | 0.99102443 |
| 217 | FR185165                    | Mylk2         | 0.00012084  | 0.99101102 |
| 218 | chr1_183142656_183163206_R  | Bnc2          | 0.000120923 | -0.9910079 |
| 219 | chr11_116936834_116948799_R | Tmprss11bnl   | 0.000120958 | 0.99100661 |
| 220 | FR087925                    | 4930449A18Rik | 0.000121046 | -0.9910033 |
| 221 | FR117744                    | Defb46        | 0.000121279 | 0.99099468 |
| 222 | ENSMUST00000139056          | Epha1         | 0.000121612 | 0.99098228 |
| 223 | chr12_16873410_16873872_F   | Suv420h1      | 0.000121701 | -0.990979  |
| 224 | FR319563                    | Gm10461       | 0.000121835 | -0.990974  |
| 225 | FR294279                    | Gm4583        | 0.00012185  | 0.99097344 |
| 226 | chr5_31883451_31884082_F    | Abcg3         | 0.000121853 | 0.99097336 |
| 227 | chr6_52046805_52072744_R    | Tmprss11bnl   | 0.000121892 | 0.9909719  |
| 228 | NR_033641.2                 | Slc6a7        | 0.000121898 | -0.9909717 |
| 229 | FR298560                    | Fam155a       | 0.000122175 | -0.9909614 |
| 230 | FR212572                    | LOC101056428  | 0.000122438 | 0.99095168 |
| 231 | chr2_151992806_152025456_F  | Gm581         | 0.000122503 | -0.9909493 |
| 232 | chr12_89519675_89533975_F   | C87490        | 0.000122574 | 0.99094664 |
| 233 | FR283504                    | C87487        | 0.000122778 | 0.99093909 |
| 234 | FR287008                    | Gm6934        | 0.000122825 | 0.99093735 |
| 235 | chr14_105497388_105511063_F | Tmprss11bnl   | 0.000123025 | 0.99092999 |
| 236 | chr1_75075500_75102200_R    | A930018P22Rik | 0.000123088 | -0.9909276 |
| 237 | n412060                     | 9430076C15Rik | 0.000123131 | 0.99092607 |
| 238 | chr13_98281158_98285757_F   | Zfp473        | 0.000123224 | -0.9909226 |
| 239 | n290544                     | Cnksr2        | 0.000123232 | 0.99092235 |
| 240 | ENSMUST00000125250          | Mylk2         | 0.000123425 | 0.99091522 |
| 241 | chrX_102568332_102587093_R  | Gm6934        | 0.000123434 | 0.99091488 |
| 242 | FR202182                    | 9130011E15Rik | 0.000123628 | 0.99090775 |
| 243 | ENSMUST00000180590          | Cir1          | 0.000123639 | 0.99090734 |
| 244 | FR279620                    | Fam155a       | 0.000123674 | 0.99090606 |
| 245 | FR149067                    | Sycp2         | 0.000123684 | 0.99090569 |
| 246 | chr1_138473514_138476054_R  | Pifo          | 0.00012378  | 0.99090214 |
| 247 | FR389545                    | Pih1d3        | 0.000124018 | -0.9908934 |
| 248 | chr15_60732209_60732822_R   | Necab1        | 0.000124038 | -0.9908926 |
| 249 | chr9_14480441_14483362_F    | Slc10a5       | 0.000124146 | 0.99088866 |
| 250 | FR375498                    | Slc10a5       | 0.000124174 | 0.99088764 |
| 251 | FR065159                    | LOC641235     | 0.000124247 | -0.990885  |
| 252 | FR029778                    | Zfp689        | 0.000124279 | 0.99088381 |
| 253 | FR121241                    | Galp          | 0.000124347 | 0.99088131 |
| 254 | XR_141342.2                 | Slc25a42      | 0.000124436 | -0.990878  |
| 255 | FR043548                    | Kcnq4         | 0.000124586 | -0.9908725 |
| 256 | FR032503                    | Abcg3         | 0.000124598 | 0.99087208 |

|     |                            |               |             |            |
|-----|----------------------------|---------------|-------------|------------|
| 257 | FR279620                   | Mettl7a2      | 0.000124642 | 0.99087046 |
| 258 | chr8_41475940_41476460_F   | Mboat4        | 0.000124642 | 0.99087049 |
| 259 | FR005836                   | D830044I16Rik | 0.000124706 | 0.99086811 |
| 260 | ENSMUST00000155173         | Tmprss11bnl   | 0.000124904 | 0.99086086 |
| 261 | FR057053                   | Kirrel3       | 0.00012491  | 0.99086065 |
| 262 | FR199374                   | A930018P22Rik | 0.000124927 | -0.99086   |
| 263 | n296710                    | Akna          | 0.000124969 | 0.99085847 |
| 264 | chr5_149751979_149808240_F | Gm16287       | 0.000125093 | 0.99085396 |
| 265 | chr10_8606683_8665783_R    | Prtn3         | 0.000125157 | 0.99085162 |
| 266 | n418283                    | Tmprss11bnl   | 0.000125237 | 0.99084867 |
| 267 | FR208702                   | Abcg3         | 0.000125601 | 0.99083538 |
| 268 | FR065962                   | Zfp866        | 0.000125668 | 0.99083291 |
| 269 | FR115704                   | Slc6a7        | 0.000125893 | -0.9908247 |
| 270 | FR254927                   | 3110021A11Rik | 0.000126062 | -0.9908185 |
| 271 | chr8_26345571_26346095_R   | Prtn3         | 0.000126155 | 0.99081514 |
| 272 | chr5_31883451_31884082_F   | Tesc1         | 0.000126245 | 0.99081185 |
| 273 | n283487                    | Mcpt-ps1      | 0.000126273 | -0.9908108 |
| 274 | chr13_34693404_34717987_F  | Necab1        | 0.00012628  | 0.99081057 |
| 275 | chr14_20893694_20903726_F  | Galp          | 0.000126352 | 0.99080795 |
| 276 | n418309                    | Mcpt9         | 0.000126379 | 0.99080699 |
| 277 | chr9_14480441_14483362_F   | Kirrel3       | 0.000126457 | 0.99080415 |
| 278 | n419646                    | Podxl         | 0.000126615 | 0.99079837 |
| 279 | n265955                    | A930018P22Rik | 0.000126782 | 0.9907923  |
| 280 | FR065962                   | Gm6934        | 0.000126786 | 0.99079215 |
| 281 | chr5_149751979_149808240_F | Prtn3         | 0.000126873 | 0.99078901 |
| 282 | ENSMUST00000134129         | Gatm          | 0.000127049 | -0.9907826 |
| 283 | FR162622                   | D830044I16Rik | 0.000127345 | 0.99077187 |
| 284 | NR_045899.1                | Fam155a       | 0.000127347 | 0.99077177 |
| 285 | chr14_25923295_25923893_F  | Prtn3         | 0.000127433 | 0.99076866 |
| 286 | chr13_98281158_98285757_F  | Epha1         | 0.000127453 | -0.9907679 |
| 287 | FR184042                   | Mcoln3        | 0.000127596 | -0.9907628 |
| 288 | chr9_56646768_56649068_R   | Pla2g10       | 0.0001276   | -0.9907626 |
| 289 | FR035623                   | Agbl2         | 0.000127605 | 0.99076244 |
| 290 | FR185165                   | Slc39a4       | 0.000127649 | -0.9907608 |
| 291 | FR007873                   | Abcg3         | 0.000127669 | 0.99076012 |
| 292 | chr2_158169020_158191295_F | Gm16381       | 0.00012767  | -0.9907601 |
| 293 | chr1_92546371_92551596_R   | P2ry1         | 0.00012775  | -0.9907572 |
| 294 | chr12_16873410_16873872_F  | Bnc2          | 0.000127783 | -0.990756  |
| 295 | chr9_67414463_67483185_R   | Galp          | 0.000127868 | 0.99075291 |
| 296 | chr7_26212709_26230775_F   | Lax1          | 0.00012806  | 0.99074595 |
| 297 | FR168142                   | Lrp2          | 0.000128225 | 0.99073997 |
| 298 | FR074898                   | Defb46        | 0.000128262 | 0.99073862 |
| 299 | Gomafu                     | 4930548F15Rik | 0.000128294 | 0.99073748 |

|     |                             |               |             |            |
|-----|-----------------------------|---------------|-------------|------------|
| 300 | FR019091                    | Mettl7a2      | 0.000128296 | 0.99073741 |
| 301 | FR152607                    | Pigr          | 0.000128403 | -0.9907335 |
| 302 | FR237950                    | Kcnq4         | 0.000128447 | 0.99073194 |
| 303 | FR238565                    | Fut2          | 0.000128532 | 0.99072887 |
| 304 | chr10_18036490_18059965_F   | Cox15         | 0.000128699 | 0.99072285 |
| 305 | FR238565                    | Suv420h1      | 0.000128711 | 0.9907224  |
| 306 | FR152607                    | Prtn3         | 0.000128747 | 0.99072113 |
| 307 | FR238898                    | A730021G18Rik | 0.000129037 | 0.99071065 |
| 308 | FR326589                    | 9130011E15Rik | 0.000129315 | 0.99070063 |
| 309 | chr1_183142656_183163206_R  | Mettl7a2      | 0.000129318 | -0.9907005 |
| 310 | chr15_100908323_100908645_F | Gm581         | 0.000129375 | -0.9906985 |
| 311 | FR219193                    | Olfr319       | 0.000129382 | 0.99069824 |
| 312 | n290305                     | 5033403F01Rik | 0.000129677 | 0.99068762 |
| 313 | n290305                     | Ushbp1        | 0.000129738 | 0.99068541 |
| 314 | chr8_41475940_41476460_F    | Slc17a9       | 0.000129791 | 0.9906835  |
| 315 | uc.411+                     | 2310067P03Rik | 0.000129973 | 0.99067699 |
| 316 | chr12_55271691_55276492_R   | Zfp473        | 0.000130033 | 0.99067481 |
| 317 | chr2_72818943_72826893_R    | Prtn3         | 0.000130424 | 0.99066078 |
| 318 | FR202182                    | Gm3952        | 0.000130444 | 0.99066009 |
| 319 | FR283504                    | Mcoln3        | 0.000130481 | -0.9906587 |
| 320 | FR247760                    | Cd180         | 0.00013061  | 0.99065411 |
| 321 | FR066795                    | Slc6a7        | 0.000130693 | 0.99065116 |
| 322 | FR283931                    | Fam155a       | 0.000130702 | -0.9906508 |
| 323 | FR155040                    | Snph          | 0.000130789 | 0.99064771 |
| 324 | NR_033641.2                 | Fanc1         | 0.000131019 | 0.99063949 |
| 325 | chr6_47959825_47960502_R    | Ighv1-77      | 0.000131153 | -0.9906347 |
| 326 | n290305                     | Epha1         | 0.000131308 | 0.99062916 |
| 327 | FR168142                    | Fanc1         | 0.000131356 | 0.99062742 |
| 328 | chr6_52046805_52072744_R    | Tmod4         | 0.000131768 | 0.99061273 |
| 329 | FR092975                    | Pifo          | 0.000131898 | -0.9906081 |
| 330 | FR097477                    | Gm4583        | 0.000132057 | 0.99060242 |
| 331 | chr14_105497388_105511063_F | Gm6934        | 0.000132149 | 0.99059914 |
| 332 | chr1_196445304_196445818_R  | 2310067P03Rik | 0.000132419 | -0.9905895 |
| 333 | FR285140                    | Slc17a9       | 0.000132445 | -0.9905886 |
| 334 | FR114000                    | Adam21        | 0.000132482 | 0.99058728 |
| 335 | FR055065                    | Gm6934        | 0.000132525 | 0.99058575 |
| 336 | chr1_75075500_75102200_R    | Bnc2          | 0.000132585 | 0.9905836  |
| 337 | n272641                     | Gsdma2        | 0.000132606 | 0.99058287 |
| 338 | chr2_151992806_152025456_F  | Kcnq4         | 0.000132998 | 0.99056894 |
| 339 | n416957                     | Icos          | 0.000133083 | 0.9905659  |
| 340 | FR117744                    | Fam155a       | 0.000133124 | 0.99056447 |
| 341 | chr1_162965001_162966376_F  | Eps15l1       | 0.000133143 | 0.9905638  |
| 342 | FR171433                    | Abcg3         | 0.000133281 | 0.99055891 |



|     |                            |               |             |            |
|-----|----------------------------|---------------|-------------|------------|
| 343 | NR_076393.1                | Slc34a3       | 0.000133313 | -0.9905578 |
| 344 | ENSMUST00000130677         | Cd300ld       | 0.000133577 | -0.9905484 |
| 345 | FR090859                   | Slc6a7        | 0.000133661 | -0.9905454 |
| 346 | chr7_80762708_80763274_R   | Rsph3a        | 0.000133786 | -0.990541  |
| 347 | chr1_167515313_167516122_F | Btn1l         | 0.000133801 | 0.99054046 |
| 348 | FR087537                   | S100b         | 0.000133883 | -0.9905376 |
| 349 | chr8_26345571_26346095_R   | Mylk2         | 0.000133909 | 0.99053665 |
| 350 | FR097477                   | Sycp2         | 0.00013393  | -0.9905359 |
| 351 | chr8_119732348_119749198_R | Ikzf4         | 0.000134216 | 0.99052579 |
| 352 | FR162622                   | Kcnq4         | 0.000134247 | 0.99052469 |
| 353 | FR032503                   | Bnc2          | 0.000134322 | 0.99052202 |
| 354 | ENSMUST00000141575         | Zfp866        | 0.000134515 | 0.99051521 |
| 355 | chr15_38205154_38206196_F  | Podxl         | 0.000134751 | -0.9905069 |
| 356 | chr3_40439525_40509975_R   | Gm16381       | 0.000135283 | -0.9904881 |
| 357 | chr13_48576557_48581632_F  | Anxa13        | 0.000135407 | 0.99048377 |
| 358 | FR326589                   | Defb46        | 0.000135422 | 0.99048323 |
| 359 | FR187810                   | Mical2        | 0.000135465 | 0.99048173 |
| 360 | FR233225                   | Suv420h1      | 0.000135475 | 0.99048139 |
| 361 | FR302411                   | C87487        | 0.000135527 | -0.9904796 |
| 362 | chr1_138570107_138632310_R | A930018P22Rik | 0.000135584 | 0.99047755 |
| 363 | chr10_8606683_8665783_R    | Sdk2          | 0.000135607 | 0.99047673 |
| 364 | FR140001                   | Socs6         | 0.000135638 | 0.99047566 |
| 365 | FR054476                   | Zfp689        | 0.000135655 | 0.99047505 |
| 366 | n294791                    | Epha1         | 0.000135656 | 0.99047502 |
| 367 | FR162622                   | Tmod4         | 0.000135896 | 0.99046657 |
| 368 | n414371                    | Gm10461       | 0.000136336 | 0.99045113 |
| 369 | ENSMUST00000155173         | Gm581         | 0.000136417 | -0.9904483 |
| 370 | FR326589                   | Epha1         | 0.000136484 | 0.99044595 |
| 371 | FR028809                   | 9330175E14Rik | 0.000136486 | 0.99044586 |
| 372 | n290305                    | Mboat4        | 0.000136663 | 0.99043968 |
| 373 | FR202182                   | Gm4583        | 0.000136677 | -0.9904392 |
| 374 | FR215734                   | Grid2         | 0.000136787 | -0.9904353 |
| 375 | ENSMUST00000155173         | Akna          | 0.000136962 | 0.99042921 |
| 376 | FR233225                   | Fam155a       | 0.000137069 | 0.99042544 |
| 377 | chr9_4260788_4261404_F     | 3110021A11Rik | 0.000137242 | 0.9904194  |
| 378 | NR_033641.2                | Snph          | 0.000137396 | 0.99041404 |
| 379 | n287284                    | Npy           | 0.000137407 | -0.9904136 |
| 380 | FR202182                   | Fanci1        | 0.000137711 | 0.99040302 |
| 381 | chr13_98513868_98517366_R  | Eps15l1       | 0.000137805 | 0.99039973 |
| 382 | FR007873                   | Brpf1         | 0.000137872 | -0.9903974 |
| 383 | FR155040                   | Zfp473        | 0.000137991 | 0.99039326 |
| 384 | FR121323                   | Prtn3         | 0.000138172 | 0.99038695 |
| 385 | chr9_67414463_67483185_R   | Krtap1-5      | 0.000138226 | 0.99038505 |

|     |                             |               |             |            |
|-----|-----------------------------|---------------|-------------|------------|
| 386 | FR168142                    | Mettl7a2      | 0.000138374 | 0.99037992 |
| 387 | n418283                     | Galp          | 0.000138471 | 0.99037652 |
| 388 | n296710                     | C87490        | 0.000138587 | 0.99037249 |
| 389 | chr8_26345571_26346095_R    | Tmprss11bnl   | 0.000138601 | 0.99037201 |
| 390 | XR_141927.1                 | Kcnq4         | 0.000138641 | 0.99037062 |
| 391 | chr4_88745771_88776323_F    | Agbl2         | 0.000138726 | 0.99036768 |
| 392 | FR019091                    | 4930548F15Rik | 0.000138738 | 0.99036723 |
| 393 | n418283                     | Tns4          | 0.000138887 | 0.99036207 |
| 394 | chr1_183142656_183163206_R  | Abcg3         | 0.000139137 | -0.9903534 |
| 395 | FR121323                    | Gm16381       | 0.000139153 | -0.9903528 |
| 396 | FR389545                    | Tas2r125      | 0.000139557 | 0.99033879 |
| 397 | n290305                     | Fam155a       | 0.000139882 | 0.99032754 |
| 398 | FR375498                    | Cd200r4       | 0.000139963 | -0.9903248 |
| 399 | FR168142                    | Gm4583        | 0.000139964 | -0.9903247 |
| 400 | ENSMUST00000163396          | Slc17a9       | 0.00014012  | -0.9903193 |
| 401 | chr12_110003268_110030953_F | A930018P22Rik | 0.000140301 | 0.99031307 |
| 402 | FR043548                    | Tmod4         | 0.000140359 | -0.990311  |
| 403 | chr9_58301467_58323783_F    | Lao1          | 0.000140398 | -0.9903097 |
| 404 | chr7_80762708_80763274_R    | Pifo          | 0.00014059  | 0.99030308 |
| 405 | FR279620                    | Slc6a7        | 0.000140633 | -0.9903016 |
| 406 | FR388349                    | Ces1f         | 0.000140761 | 0.99029716 |
| 407 | FR215734                    | Icos          | 0.000140903 | -0.9902922 |
| 408 | FR055065                    | Hoxa9         | 0.000141172 | 0.99028298 |
| 409 | FR087516                    | Aplnr         | 0.000141289 | -0.990279  |
| 410 | FR074898                    | Micu1         | 0.000141389 | 0.9902755  |
| 411 | FR326589                    | Micu1         | 0.000141674 | 0.99026568 |
| 412 | FR057053                    | Tsc22d4       | 0.000141918 | 0.99025731 |
| 413 | FR035623                    | Kcnq4         | 0.000141952 | 0.99025611 |
| 414 | chr5_31883451_31884082_F    | Lrp2          | 0.000142216 | 0.99024704 |
| 415 | n289317                     | 2310067P03Rik | 0.00014233  | 0.99024313 |
| 416 | FR064590                    | Tmprss11bnl   | 0.000142422 | 0.99023997 |
| 417 | FR100940                    | Suv420h1      | 0.000142481 | -0.990238  |
| 418 | chr3_86827945_86886695_R    | Bnc2          | 0.000142504 | 0.99023717 |
| 419 | FR351980                    | Cd180         | 0.000142736 | 0.99022921 |
| 420 | FR090859                    | Slc39a4       | 0.00014284  | 0.99022566 |
| 421 | ENSMUST00000158863          | Ikzf4         | 0.000142857 | -0.9902251 |
| 422 | FR064590                    | Ptchd4        | 0.000143008 | 0.9902199  |
| 423 | chr10_8606683_8665783_R     | A430061O12Rik | 0.000143134 | 0.99021557 |
| 424 | n289590                     | Chchd10       | 0.000143228 | 0.99021234 |
| 425 | chr8_41475940_41476460_F    | 9330133O14Rik | 0.000143482 | 0.99020366 |
| 426 | chr15_78403377_78412545_F   | Bnc2          | 0.000144295 | -0.9901759 |
| 427 | FR374009                    | Bnc2          | 0.000144391 | 0.99017265 |
| 428 | FR140001                    | 4930548F15Rik | 0.000144857 | 0.99015678 |

|     |                             |               |             |            |
|-----|-----------------------------|---------------|-------------|------------|
| 429 | ENSMUST00000158863          | Mylk2         | 0.000145252 | -0.9901433 |
| 430 | XR_141927.1                 | Sdk2          | 0.000145626 | 0.99013062 |
| 431 | FR005836                    | Btnl1         | 0.000145855 | 0.99012286 |
| 432 | FR374009                    | Elmsan1       | 0.000145915 | 0.99012081 |
| 433 | FR044110                    | Selp          | 0.00014598  | 0.99011864 |
| 434 | chr18_5813291_5813708_R     | LOC101056428  | 0.000146067 | -0.9901157 |
| 435 | FR266999                    | Gm10461       | 0.00014666  | 0.99009561 |
| 436 | FR387804                    | 9330133O14Rik | 0.00014699  | 0.99008444 |
| 437 | FR202182                    | Fam155a       | 0.000147007 | 0.99008388 |
| 438 | FR312820                    | Cd200r4       | 0.000147025 | -0.9900833 |
| 439 | chr15_60732209_60732822_R   | 9430076C15Rik | 0.000147145 | 0.99007921 |
| 440 | FR185165                    | Slc17a9       | 0.000147197 | -0.9900774 |
| 441 | FR238565                    | Slc6a7        | 0.000147352 | -0.9900722 |
| 442 | chr9_58301467_58323783_F    | Pih1d3        | 0.00014765  | 0.99006216 |
| 443 | chr12_110003268_110030953_F | LOC101056066  | 0.000147735 | 0.99005931 |
| 444 | FR279620                    | 9130011E15Rik | 0.000147846 | 0.99005555 |
| 445 | NR_045776.1                 | 9330133O14Rik | 0.000148033 | 0.99004926 |
| 446 | FR237950                    | D830044I16Rik | 0.00014819  | 0.99004398 |
| 447 | FR279620                    | 2310067P03Rik | 0.000148219 | 0.99004301 |
| 448 | FR112324                    | Elmsan1       | 0.000148272 | 0.99004121 |
| 449 | XR_105914.2                 | Prss55        | 0.00014842  | 0.99003624 |
| 450 | FR254927                    | Mboat4        | 0.0001485   | 0.99003354 |
| 451 | FR301809                    | Adam21        | 0.000148587 | 0.99003062 |
| 452 | FR347914                    | Micu1         | 0.000148643 | 0.99002876 |
| 453 | FR302003                    | Abcg3         | 0.000148911 | -0.9900197 |
| 454 | n273521                     | A430060F13Rik | 0.000149111 | 0.99001303 |
| 455 | FR202182                    | Elmsan1       | 0.000149277 | 0.99000746 |
| 456 | chr14_55317199_55317670_R   | Sypc2         | 0.000149362 | -0.9900046 |
| 457 | FR155040                    | Gm3952        | 0.000149384 | 0.9900039  |
| 458 | n289317                     | LOC101056066  | 0.000149402 | -0.9900033 |
| 459 | FR331566                    | Mylk2         | 0.000149465 | 0.99000119 |
| 460 | FR285140                    | LOC101056066  | 0.000149576 | 0.98999745 |
| 461 | n343177                     | Socs6         | 0.000149587 | 0.98999709 |
| 462 | FR030947                    | Mboat4        | 0.000149593 | 0.98999688 |
| 463 | FR168142                    | Abcg3         | 0.00014963  | 0.98999563 |
| 464 | FR266999                    | Fanc1         | 0.000149643 | -0.9899952 |
| 465 | chr12_89519675_89533975_F   | Gm16381       | 0.000149679 | -0.989994  |
| 466 | FR171433                    | 5033403F01Rik | 0.000149725 | 0.98999245 |
| 467 | FR149067                    | Ushbp1        | 0.000149913 | 0.98998617 |
| 468 | FR302411                    | Slc25a5       | 0.000150041 | 0.9899819  |
| 469 | chr6_129151512_129208737_R  | A030001D20Rik | 0.000150066 | -0.9899811 |
| 470 | chr17_64063362_64066067_R   | Prss55        | 0.000150346 | -0.9899717 |
| 471 | FR238565                    | Adam21        | 0.000150497 | 0.98996667 |

|     |                            |               |             |            |
|-----|----------------------------|---------------|-------------|------------|
| 472 | XR_141342.2                | Prkar2b       | 0.000150778 | -0.9899573 |
| 473 | chr1_75075500_75102200_R   | Adam21        | 0.000150841 | 0.98995516 |
| 474 | chr13_98513868_98517366_R  | Zfp866        | 0.000150898 | 0.98995326 |
| 475 | chr15_96597330_96663683_F  | Nme4          | 0.000150949 | -0.9899516 |
| 476 | chr2_71576218_71603818_R   | 9430076C15Rik | 0.000150958 | 0.98995127 |
| 477 | ENSMUST00000139056         | Snph          | 0.000150982 | 0.98995046 |
| 478 | FR092975                   | Gm4955        | 0.000151007 | 0.98994964 |
| 479 | chr1_196445304_196445818_R | Abcg3         | 0.000151026 | -0.989949  |
| 480 | n289317                    | Lrp2          | 0.000151145 | 0.98994503 |
| 481 | n280963                    | Il1rn         | 0.000151214 | 0.98994273 |
| 482 | NR_045776.1                | Cnksr2        | 0.000151493 | 0.98993347 |
| 483 | FR233225                   | LOC101056101  | 0.000151522 | -0.9899325 |
| 484 | FR294279                   | Fanc1         | 0.00015164  | -0.9899286 |
| 485 | FR238565                   | Lrp2          | 0.000151719 | 0.98992593 |
| 486 | FR385633                   | Zfp473        | 0.000151769 | -0.9899243 |
| 487 | FR035623                   | Tns4          | 0.000151774 | 0.98992409 |
| 488 | chr15_38205154_38206196_F  | Lao1          | 0.000151839 | 0.98992193 |
| 489 | FR057053                   | Mylk2         | 0.000151887 | 0.98992034 |
| 490 | chr1_138473514_138476054_R | Krtap1-5      | 0.000152037 | 0.98991536 |
| 491 | FR199374                   | Gm10461       | 0.000152228 | -0.989909  |
| 492 | ENSMUST00000157205         | Gm581         | 0.000152262 | -0.9899079 |
| 493 | chr13_98038568_98068079_F  | Sycp2         | 0.000152326 | 0.98990578 |
| 494 | chr19_23068397_23190256_R  | 1700084K02Rik | 0.00015244  | -0.989902  |
| 495 | chr17_29374758_29387733_R  | LOC101056066  | 0.000152475 | 0.98990083 |
| 496 | FR238565                   | 9330175E14Rik | 0.000152595 | -0.9898968 |
| 497 | chr1_75075500_75102200_R   | Snph          | 0.000152653 | 0.98989494 |
| 498 | chr15_38205154_38206196_F  | Pih1d3        | 0.000152664 | -0.9898946 |
| 499 | chr8_26345571_26346095_R   | Dnmt3l        | 0.000152799 | 0.9898901  |
| 500 | FR057053                   | Pifo          | 0.000153011 | 0.98988306 |

---

**Table-S4 GO functional enrichment analysis of top 500 lncRNA-correlated mRNAs**

| No | groups                     | enrichment Term        | p.value     | enrichment IDs                                                                                                                                                                                                     | GO_term                | Category  |
|----|----------------------------|------------------------|-------------|--------------------------------------------------------------------------------------------------------------------------------------------------------------------------------------------------------------------|------------------------|-----------|
| 1  | chr1_134167181_134181386_R | chromosome             | 0.000215058 | Ctc1; Rad211; Spata22; Suv420h1; Sycp2; Xist                                                                                                                                                                       | chromosome             | Component |
| 2  | chr1_134167181_134181386_R | transcytosis           | 0.000257462 | Rab17; Tg                                                                                                                                                                                                          | transcytosis           | Process   |
| 3  | chr1_134167181_134181386_R | fertilization          | 0.000265772 | Rad211; Spata22; Sycp2                                                                                                                                                                                             | fertilization          | Process   |
| 4  | chr1_134167181_134181386_R | chaperone binding      | 0.000501509 | Hspe1; Pih1d3; Tg                                                                                                                                                                                                  | chaperone binding      | Function  |
| 5  | chr1_138570107_138632310_R | brush border membrane  | 0.000430827 | Folr1; Lrp2; Pdzk1; Shank2                                                                                                                                                                                         | brush border membrane  | Component |
| 6  | chr1_162965001_162966376_F | brush border membrane  | 0.000409642 | Folr1; Lrp2; Pdzk1; Shank2                                                                                                                                                                                         | brush border membrane  | Component |
| 7  | chr1_167515313_167516122_F | brush border membrane  | 0.000350557 | Folr1; Pdzk1; Shank2; Slc34a3                                                                                                                                                                                      | brush border membrane  | Component |
| 8  | chr1_183783306_183834531_F | transport              | 0.000154079 | Abcb8; Abcg3; Aqp4; Atp5h; Chmp4c; Cpt2; Etfdh; Fabp3; Folr1; Grid2; Grik3; Kcnk4; Kcnq4; Mcoln3; Micu1; Mup20; Pdzk1; Pex14; Pitpnc1; Rab17; Slc10a5; Slc17a9; Slc25a1; Slc25a42; Slc25a5; Slc39a4; Slc6a7; Trpm3 | transport              | Process   |
| 9  | chr1_196445304_196445818_R | brush border membrane  | 0.000420139 | Folr1; Lrp2; Pdzk1; Shank2                                                                                                                                                                                         | brush border membrane  | Component |
| 10 | chr1_69531191_69570566_F   | phospholipase activity | 0.000338157 | Abhd15; Nceh1; Pla2g10                                                                                                                                                                                             | phospholipase activity | Function  |
| 11 | chr1_75075500_75102200_R   | PDZ domain binding     | 0.000465558 | Grid2; Kirrel3; Lrp2; Pdzk1; Ushbp1                                                                                                                                                                                | PDZ domain binding     | Function  |
| 12 | chr1_92546371_92551596_R   | transport              | 0.00024062  | Abcb8; Chmp4c; Cpt2; Etfdh; Fabp3; Grid2; Kcnk4; Mcoln3; Micu1; Mup20; Pitpnc1; Rab17; Slc25a1; Slc25a42; Slc25a5; Slc39a4; Slc6a7; Trpm3                                                                          | transport              | Process   |
| 13 | chr1_92549499_92550225_R   | transport              | 0.000229024 | Abcb8; Aqp4; Atp5h; Chmp4c; Cpt2; Etfdh; Fabp3; Grid2; Kcnk4; Kcnq4; Mcoln3; Mup20; Pdzk1; Pex14; Pitpnc1; Rab17; Slc17a9; Slc25a42; Slc25a5; Slc39a4; Slc6a7; Trpm3                                               | transport              | Process   |
| 14 | chr1_92549499_92550225_R   | transporter activity   | 0.000407316 | Aqp4; Fabp3; Grid2; Mup20; Slc17a9; Slc25a5                                                                                                                                                                        | transporter activity   | Function  |

|    |                              |                                                        |             |                                                                                                                                                                                                   |                                                        |           |
|----|------------------------------|--------------------------------------------------------|-------------|---------------------------------------------------------------------------------------------------------------------------------------------------------------------------------------------------|--------------------------------------------------------|-----------|
| 15 | chr1_92549499_92550225_R     | fatty acid beta-oxidation using acyl-CoA dehydrogenase | 0.000418462 | Acad11; Etfdh                                                                                                                                                                                     | fatty acid beta-oxidation using acyl-CoA dehydrogenase | Process   |
| 16 | chr10_116814196_116920696_R  | regulation of body fluid levels                        | 0.000371315 | Apln; Aplnr                                                                                                                                                                                       | regulation of body fluid levels                        | Process   |
| 17 | chr10_39666719_39679959_R    | transporter activity                                   | 0.000111808 | Aqp4; Fabp3; Grid2; Mup20; Slc17a9; Slc22a23; Slc25a5                                                                                                                                             | transporter activity                                   | Function  |
| 18 | chr10_39666719_39679959_R    | receptor binding                                       | 0.000244324 | Apln; Galp; Gdf5; Kng2; Pex14; S100b; Six3; Tg; Wnt8a                                                                                                                                             | receptor binding                                       | Function  |
| 19 | chr10_8606683_8665783_R      | brush border membrane                                  | 0.000399334 | Folr1; Lrp2; Pdzk1; Shank2                                                                                                                                                                        | brush border membrane                                  | Component |
| 20 | chr11_116936834_116948799_R  | brush border membrane                                  | 0.000273743 | Lrp2; Pdzk1; Shank2; Slc34a3                                                                                                                                                                      | brush border membrane                                  | Component |
| 21 | chr11_120041124_120052299_F  | receptor activity                                      | 0.000403666 | Cd200r4; Folr1; Grid2; Grik3; Lrp2; Plxna4                                                                                                                                                        | receptor activity                                      | Function  |
| 22 | chr11_120079199_120130099_R  | mitochondrial inner membrane                           | 0.000185336 | Abcb8; Atp5h; Cox15; Cpt2; Etfdh; Gatm; Idh2; Micu1; Slc25a1; Slc25a5                                                                                                                             | mitochondrial inner membrane                           | Component |
| 23 | chr11_120079199_120130099_R  | apical plasma membrane                                 | 0.000337522 | Gp2; Lrp2; P2ry1; Pdzk1; Podxl; Rab17; Shank2; Slc39a4                                                                                                                                            | apical plasma membrane                                 | Component |
| 24 | chr11_120079199_120130099_R  | transport                                              | 0.000369785 | Abcb8; Abcg3; Apoc1; Aqp4; Atp5h; Chmp4c; Cpt2; Etfdh; Fabp3; Folr1; Grid2; Grik3; Kcnk4; Kcnq4; Mcoln3; Micu1; Pdzk1; Pitpnc1; Rab17; Slc10a5; Slc17a9; Slc25a1; Slc25a5; Slc39a4; Slc6a7; Trpm3 | transport                                              | Process   |
| 25 | chr11_33414450_33450750_F    | transcytosis                                           | 0.00034282  | Rab17; Tg                                                                                                                                                                                         | transcytosis                                           | Process   |
| 26 | chr11_33414450_33450750_F    | fertilization                                          | 0.000405384 | Rad21l; Spata22; Sycp2                                                                                                                                                                            | fertilization                                          | Process   |
| 27 | chr11_6796679_6797670_F      | brush border membrane                                  | 0.000350557 | Folr1; Lrp2; Pdzk1; Shank2                                                                                                                                                                        | brush border membrane                                  | Component |
| 28 | chr11_69184157_69201732_R    | brush border membrane                                  | 0.000236738 | Lrp2; Pdzk1; Shank2; Slc34a3                                                                                                                                                                      | brush border membrane                                  | Component |
| 29 | chr11_87841800_87858725_F    | apical plasma membrane                                 | 0.000199219 | Gp2; Lrp2; P2ry1; Pdzk1; Podxl; Rab17; Slc39a4                                                                                                                                                    | apical plasma membrane                                 | Component |
| 30 | chr11_87841800_87858725_F    | PDZ domain binding                                     | 0.000286675 | Grid2; Kirrel3; Lrp2; Pdzk1; Ushbp1                                                                                                                                                               | PDZ domain binding                                     | Function  |
| 31 | chr11_87841800_87858725_F    | mitochondrial inner membrane                           | 0.000320715 | Abcb8; Cox15; Cpt2; Gatm; Idh2; Micu1; Slc25a1; Slc25a5                                                                                                                                           | mitochondrial inner membrane                           | Component |
| 32 | chr12_110003268_1100030953_F | mitochondrial inner membrane                           | 0.000364271 | Abcb8; Atp5h; Cox15; Cpt2; Gatm; Idh2; Micu1; Slc25a1; Slc25a5                                                                                                                                    | mitochondrial inner membrane                           | Component |
| 33 | chr12_110003268_1100030953_F | brush border membrane                                  | 0.000420139 | Folr1; Lrp2; Pdzk1; Shank2                                                                                                                                                                        | brush border membrane                                  | Component |

|    |                                 |                                    |             |                                                                                                                                                                                                                                    |                                    |           |
|----|---------------------------------|------------------------------------|-------------|------------------------------------------------------------------------------------------------------------------------------------------------------------------------------------------------------------------------------------|------------------------------------|-----------|
| 34 | chr12_111287772_11<br>1333890_F | mitochondrial<br>inner membrane    | 0.000364271 | Abcb8; Atp5h; Cox15;<br>Cpt2; Gatm; Idh2; Micu1;<br>Slc25a1; Slc25a5                                                                                                                                                               | mitochondrial<br>inner membrane    | Component |
| 35 | chr12_55271691_552<br>76492_R   | apical plasma<br>membrane          | 0.000299072 | Gp2; Lrp2; P2ry1; Pdzk1;<br>Podxl; Rab17; Slc39a4                                                                                                                                                                                  | apical plasma<br>membrane          | Component |
| 36 | chr12_55271691_552<br>76492_R   | PDZ domain<br>binding              | 0.000388956 | Grid2; Kirrel3; Lrp2;<br>Pdzk1; Ushbp1                                                                                                                                                                                             | PDZ domain<br>binding              | Function  |
| 37 | chr12_55271691_552<br>76492_R   | receptor activity                  | 0.000439935 | Cd200r4; Folr1; Grid2;<br>Grik3; Lrp2; Plxna4                                                                                                                                                                                      | receptor activity                  | Function  |
| 38 | chr12_89519675_895<br>33975_F   | brush border<br>membrane           | 0.000409642 | Folr1; Lrp2; Pdzk1;<br>Shank2                                                                                                                                                                                                      | brush border<br>membrane           | Component |
| 39 | chr13_107822042_10<br>7823753_F | apical plasma<br>membrane          | 0.000345526 | Gp2; Lrp2; P2ry1; Pdzk1;<br>Podxl; Rab17; Slc39a4                                                                                                                                                                                  | apical plasma<br>membrane          | Component |
| 40 | chr13_107822042_10<br>7823753_F | PDZ domain<br>binding              | 0.000433668 | Grid2; Kirrel3; Lrp2;<br>Pdzk1; Ushbp1                                                                                                                                                                                             | PDZ domain<br>binding              | Function  |
| 41 | chr13_107822042_10<br>7823753_F | receptor activity                  | 0.000499048 | Cd200r4; Folr1; Grid2;<br>Grik3; Lrp2; Plxna4                                                                                                                                                                                      | receptor activity                  | Function  |
| 42 | chr13_15947521_159<br>99246_R   | mitochondrial<br>inner membrane    | 0.000194494 | Abcb8; Atp5h; Cox15;<br>Cpt2; Etfhdh; Gatm; Idh2;<br>Micu1; Slc25a1; Slc25a5                                                                                                                                                       | mitochondrial<br>inner membrane    | Component |
| 43 | chr13_34872696_349<br>06407_R   | regulation of body<br>fluid levels | 0.000371315 | Apln; Aplnr                                                                                                                                                                                                                        | regulation of body<br>fluid levels | Process   |
| 44 | chr13_66381200_664<br>10200_F   | brush border<br>membrane           | 0.000369523 | Lrp2; Pdzk1; Shank2;<br>Slc34a3                                                                                                                                                                                                    | brush border<br>membrane           | Component |
| 45 | chr13_74642700_747<br>01900_F   | PDZ domain<br>binding              | 0.000286675 | Grid2; Kirrel3; Lrp2;<br>Pdzk1; Ushbp1                                                                                                                                                                                             | PDZ domain<br>binding              | Function  |
| 46 | chr13_74642700_747<br>01900_F   | receptor activity                  | 0.000308692 | Cd200r4; Folr1; Grid2;<br>Grik3; Lrp2; Plxna4                                                                                                                                                                                      | receptor activity                  | Function  |
| 47 | chr13_76326228_763<br>32632_F   | transport                          | 0.000303198 | Abcb8; Abcg3; Apoc1;<br>Aqp4; Atp5h; Chmp4c;<br>Cpt2; Etfhdh; Fabp3; Folr1;<br>Grid2; Grik3; Kcnk4;<br>Kcnq4; Mcoln3; Micu1;<br>Pdzk1; Pex14; Pitpnc1;<br>Rab17; Slc10a5; Slc17a9;<br>Slc22a23; Slc25a5;<br>Slc39a4; Slc6a7; Trpm3 | transport                          | Process   |
| 48 | chr13_98281158_982<br>85757_F   | apical plasma<br>membrane          | 0.000498152 | Gp2; Lrp2; P2ry1; Pdzk1;<br>Podxl; Rab17; Slc39a4                                                                                                                                                                                  | apical plasma<br>membrane          | Component |
| 49 | chr14_105497388_10<br>5511063_F | brush border<br>membrane           | 0.000266031 | Lrp2; Pdzk1; Shank2;<br>Slc34a3                                                                                                                                                                                                    | brush border<br>membrane           | Component |
| 50 | chr14_14688472_147<br>47272_F   | regulation of body<br>fluid levels | 0.000431674 | Apln; Aplnr                                                                                                                                                                                                                        | regulation of body<br>fluid levels | Process   |
| 51 | chr14_21621875_216<br>38625_R   | PDZ domain<br>binding              | 0.000415591 | Frzb; Grid2; Kirrel3; Lrp2;<br>Pdzk1; Ushbp1                                                                                                                                                                                       | PDZ domain<br>binding              | Function  |
| 52 | chr14_25923295_259<br>23893_F   | PDZ domain<br>binding              | 0.000351966 | Frzb; Grid2; Kirrel3; Lrp2;<br>Pdzk1; Ushbp1                                                                                                                                                                                       | PDZ domain<br>binding              | Function  |

|    |                                 |                                                    |             |                                                                                                                                                                                                                                                 |                                                    |           |
|----|---------------------------------|----------------------------------------------------|-------------|-------------------------------------------------------------------------------------------------------------------------------------------------------------------------------------------------------------------------------------------------|----------------------------------------------------|-----------|
| 53 | chr14_25923295_259<br>23893_F   | transport                                          | 0.000466309 | Abcb8; Abcg3; Apoc1;<br>Aqp4; Atp5h; Chmp4c;<br>Cpt2; Etfdh; Folr1; Grid2;<br>Grik3; Kenk4; Kcnq4;<br>Mcoln3; Micu1; Pdzk1;<br>Pex14; Pitpnc1; Rab17;<br>Slc10a5; Slc17a9;<br>Slc22a23; Slc25a1;<br>Slc25a5; Slc34a3; Slc39a4;<br>Slc6a7; Trpm3 | transport                                          | Process   |
| 54 | chr14_25923295_259<br>23893_F   | mitochondrial<br>inner membrane                    | 0.000474944 | Abcb8; Atp5h; Cox15;<br>Cpt2; Etfdh; Gatm; Idh2;<br>Micu1; Slc25a1; Slc25a5                                                                                                                                                                     | mitochondrial<br>inner membrane                    | Component |
| 55 | chr14_73729977_737<br>51877_R   | regulation of body<br>fluid levels                 | 0.000447463 | Apln; Aplnr                                                                                                                                                                                                                                     | regulation of body<br>fluid levels                 | Process   |
| 56 | chr14_77511189_775<br>22852_F   | negative regulation<br>of Wnt signaling<br>pathway | 0.000147037 | Dkk2; Frzb; Six3                                                                                                                                                                                                                                | negative<br>regulation of Wnt<br>signaling pathway | Process   |
| 57 | chr15_100908323_10<br>0908645_F | apical plasma<br>membrane                          | 0.000298978 | Gp2; Lrp2; Pdzk1; Podxl;<br>Rab17; Shank2; Slc34a3;<br>Slc39a4                                                                                                                                                                                  | apical plasma<br>membrane                          | Component |
| 58 | chr15_32167516_321<br>74417_R   | apical plasma<br>membrane                          | 0.000362234 | Gp2; Lrp2; P2ry1; Pdzk1;<br>Podxl; Rab17; Slc39a4                                                                                                                                                                                               | apical plasma<br>membrane                          | Component |
| 59 | chr15_32167516_321<br>74417_R   | PDZ domain<br>binding                              | 0.0004494   | Grid2; Kirrel3; Lrp2;<br>Pdzk1; Ushbp1                                                                                                                                                                                                          | PDZ domain<br>binding                              | Function  |
| 60 | chr15_78403377_784<br>12545_F   | apical plasma<br>membrane                          | 0.000245075 | Gp2; Lrp2; P2ry1; Pdzk1;<br>Podxl; Rab17; Slc39a4                                                                                                                                                                                               | apical plasma<br>membrane                          | Component |
| 61 | chr15_78403377_784<br>12545_F   | PDZ domain<br>binding                              | 0.000334867 | Grid2; Kirrel3; Lrp2;<br>Pdzk1; Ushbp1                                                                                                                                                                                                          | PDZ domain<br>binding                              | Function  |
| 62 | chr15_78403377_784<br>12545_F   | receptor activity                                  | 0.000369777 | Cd200r4; Folr1; Grid2;<br>Grik3; Lrp2; Plxna4                                                                                                                                                                                                   | receptor activity                                  | Function  |
| 63 | chr16_44720170_447<br>23911_R   | regulation of body<br>fluid levels                 | 0.000264062 | Apln; Aplnr                                                                                                                                                                                                                                     | regulation of body<br>fluid levels                 | Process   |
| 64 | chr16_4871449_4874<br>336_R     | PDZ domain<br>binding                              | 0.000361146 | Grid2; Kirrel3; Lrp2;<br>Pdzk1; Ushbp1                                                                                                                                                                                                          | PDZ domain<br>binding                              | Function  |
| 65 | chr17_29374758_293<br>87733_R   | brush border<br>membrane                           | 0.000314733 | Folr1; Lrp2; Pdzk1;<br>Shank2                                                                                                                                                                                                                   | brush border<br>membrane                           | Component |
| 66 | chr18_5813291_5813<br>708_R     | brush border<br>membrane                           | 0.000499073 | Folr1; Lrp2; Pdzk1;<br>Shank2                                                                                                                                                                                                                   | brush border<br>membrane                           | Component |
| 67 | chr18_67435075_674<br>47150_F   | brush border<br>membrane                           | 0.000420139 | Folr1; Lrp2; Pdzk1;<br>Shank2                                                                                                                                                                                                                   | brush border<br>membrane                           | Component |
| 68 | chr18_69923410_699<br>65360_R   | transport                                          | 0.000305466 | Abcb8; Abcg3; Apoc1;<br>Aqp4; Atp5h; Chmp4c;<br>Cpt2; Etfdh; Folr1; Grid2;<br>Grik3; Kenk4; Kcnq4;<br>Mcoln3; Micu1; Pdzk1;<br>Pex14; Rab17; Slc10a5;<br>Slc17a9; Slc22a23;<br>Slc25a5; Slc34a3; Slc39a4;<br>Slc6a7; Trpm3                      | transport                                          | Process   |
| 69 | chr18_69923410_699<br>65360_R   | apical plasma<br>membrane                          | 0.000311404 | Gp2; Lrp2; Pdzk1; Podxl;<br>Rab17; Shank2; Slc34a3;<br>Slc39a4                                                                                                                                                                                  | apical plasma<br>membrane                          | Component |
| 70 | chr18_70400082_704<br>04236_R   | receptor binding                                   | 0.000115976 | Apln; Gdf5; Kng2; Pex14;<br>S100b; Six3; Tg; Wnt8a                                                                                                                                                                                              | receptor binding                                   | Function  |



|    |                            |                                                      |             |                                                                                                                                                                                                |                                                      |           |
|----|----------------------------|------------------------------------------------------|-------------|------------------------------------------------------------------------------------------------------------------------------------------------------------------------------------------------|------------------------------------------------------|-----------|
| 71 | chr18_70400082_70404236_R  | regulation of body fluid levels                      | 0.000378615 | Apln; Aplnr                                                                                                                                                                                    | regulation of body fluid levels                      | Process   |
| 72 | chr19_23068397_23190256_R  | brush border membrane                                | 0.000379277 | Folr1; Lrp2; Pdzk1; Shank2                                                                                                                                                                     | brush border membrane                                | Component |
| 73 | chr19_33049479_33054553_R  | extracellular space                                  | 0.000124513 | Angptl4; Apln; Cx3cl1; Dkk2; Frzb; Kng2; Lgals3bp; Npy; Pla2g7; S100b; Selp; Spp1; Vcam1                                                                                                       | extracellular space                                  | Component |
| 74 | chr19_33049479_33054553_R  | amine metabolic process                              | 0.000180356 | Cyp1a1; Vcam1                                                                                                                                                                                  | amine metabolic process                              | Process   |
| 75 | chr19_33049479_33054553_R  | IPAF inflammasome complex                            | 0.000180356 | Casp4; Naip2                                                                                                                                                                                   | IPAF inflammasome complex                            | Component |
| 76 | chr19_33049479_33054553_R  | regulation of body fluid levels                      | 0.000251922 | Apln; Aplnr                                                                                                                                                                                    | regulation of body fluid levels                      | Process   |
| 77 | chr19_33049479_33054553_R  | pyroptosis                                           | 0.000335131 | Casp4; Naip2                                                                                                                                                                                   | pyroptosis                                           | Process   |
| 78 | chr19_33049479_33054553_R  | cell adhesion                                        | 0.000426019 | Cx3cl1; Lgals3bp; Nrp2; Sdc3; Sdk2; Selp; Spp1; Vcam1                                                                                                                                          | cell adhesion                                        | Process   |
| 79 | chr19_33049479_33054553_R  | negative regulation of vasoconstriction              | 0.000429902 | Apln; Cx3cl1                                                                                                                                                                                   | negative regulation of vasoconstriction              | Process   |
| 80 | chr19_33049479_33054553_R  | negative regulation of interleukin-1 beta production | 0.000429902 | Acp5; Aqp4                                                                                                                                                                                     | negative regulation of interleukin-1 beta production | Process   |
| 81 | chr19_33049479_33054553_R  | blood microparticle                                  | 0.000459199 | Angptl4; Cpn2; Kng2; Lgals3bp                                                                                                                                                                  | blood microparticle                                  | Component |
| 82 | chr2_108456668_108532418_R | apical plasma membrane                               | 0.000329441 | Gp2; Lrp2; P2ry1; Pdzk1; Podxl; Rab17; Slc39a4                                                                                                                                                 | apical plasma membrane                               | Component |
| 83 | chr2_108456668_108532418_R | PDZ domain binding                                   | 0.000418354 | Grid2; Kirrel3; Lrp2; Pdzk1; Ushbp1                                                                                                                                                            | PDZ domain binding                                   | Function  |
| 84 | chr2_108456668_108532418_R | receptor activity                                    | 0.000478696 | Cd200r4; Folr1; Grid2; Grik3; Lrp2; Plxna4                                                                                                                                                     | receptor activity                                    | Function  |
| 85 | chr2_11454222_11456321_R   | apical plasma membrane                               | 0.000477409 | Gp2; Lrp2; P2ry1; Pdzk1; Rab17; Slc39a4                                                                                                                                                        | apical plasma membrane                               | Component |
| 86 | chr2_132722530_132726802_F | regulation of body fluid levels                      | 0.000423885 | Apln; Aplnr                                                                                                                                                                                    | regulation of body fluid levels                      | Process   |
| 87 | chr2_157236070_157249445_R | PDZ domain binding                                   | 0.000199205 | Frzb; Grid2; Kirrel3; Lrp2; Pdzk1; Ushbp1                                                                                                                                                      | PDZ domain binding                                   | Function  |
| 88 | chr2_157236070_157249445_R | apical plasma membrane                               | 0.0003654   | Gp2; Lrp2; Pdzk1; Podxl; Rab17; Shank2; Slc34a3; Slc39a4                                                                                                                                       | apical plasma membrane                               | Component |
| 89 | chr2_157838320_157853495_F | brush border membrane                                | 0.000306205 | Folr1; Lrp2; Pdzk1; Shank2                                                                                                                                                                     | brush border membrane                                | Component |
| 90 | chr2_158169020_158191295_F | transport                                            | 0.000409825 | Abcb8; Abcg3; Apoc1; Aqp4; Atp5h; Chmp4c; Cpt2; Etfhdh; Folr1; Grid2; Grik3; Kcnk4; Mcoln3; Micu1; Pex14; Pitpnc1; Rab17; Slc10a5; Slc17a9; Slc22a23; Slc25a5; Slc34a3; Slc39a4; Slc6a7; Trpm3 | transport                                            | Process   |
| 91 | chr2_71576218_71603818_R   | brush border membrane                                | 0.000108964 | Folr1; Lrp2; Pdzk1; Shank2; Slc34a3                                                                                                                                                            | brush border membrane                                | Component |

|     |                                |                                                                  |             |                                                                                                                                                                                                             |                                                                  |           |
|-----|--------------------------------|------------------------------------------------------------------|-------------|-------------------------------------------------------------------------------------------------------------------------------------------------------------------------------------------------------------|------------------------------------------------------------------|-----------|
| 92  | chr2_71576218_7160<br>3818_R   | PDZ domain<br>binding                                            | 0.00050081  | Frzb; Grid2; Kirrel3; Lrp2;<br>Pdzk1; Ushbp1                                                                                                                                                                | PDZ domain<br>binding                                            | Function  |
| 93  | chr2_72818943_7282<br>6893_R   | apical plasma<br>membrane                                        | 0.000253252 | Gp2; Lrp2; Pdzk1; Podxl;<br>Rab17; Shank2; Slc34a3;<br>Slc39a4                                                                                                                                              | apical plasma<br>membrane                                        | Component |
| 94  | chr3_21964899_2197<br>4524_F   | fatty acid beta-<br>oxidation using<br>acyl-CoA<br>dehydrogenase | 0.000189057 | Acad11; Etfdh                                                                                                                                                                                               | fatty acid beta-<br>oxidation using<br>acyl-CoA<br>dehydrogenase | Process   |
| 95  | chr3_21964899_2197<br>4524_F   | receptor binding                                                 | 0.000231604 | Apln; Gdf5; Kng2; Pex14;<br>S100b; Six3; Wnt8a                                                                                                                                                              | receptor binding                                                 | Function  |
| 96  | chr3_21964899_2197<br>4885_F   | mitochondrial<br>inner membrane                                  | 0.000230201 | Abcb8; Atp5h; Cox15;<br>Cpt2; Etfdh; Gatm; Idh2;<br>Micu1; Slc25a5                                                                                                                                          | mitochondrial<br>inner membrane                                  | Component |
| 97  | chr3_21964899_2197<br>4885_F   | transport                                                        | 0.00036677  | Abcb8; Abcg3; Atp5h;<br>Chmp4c; Cpt2; Etfdh;<br>Fabp3; Folr1; Grid2;<br>Grik3; Kcnk4; Mcoln3;<br>Micu1; Mup20; Pdzk1;<br>Pex14; Pitpnc1; Rab17;<br>Slc17a9; Slc25a5; Slc39a4;<br>Slc6a7; Trpm3              | transport                                                        | Process   |
| 98  | chr3_35782698_3578<br>9932_R   | transport                                                        | 0.000113097 | Abcb8; Abcg3; Atp5h;<br>Chmp4c; Cpt2; Etfdh;<br>Fabp3; Folr1; Grid2;<br>Kcnk4; Kcnq4; Mcoln3;<br>Micu1; Mup20; Pdzk1;<br>Pex14; Pitpnc1; Rab17;<br>Slc10a5; Slc17a9;<br>Slc25a42; Slc39a4; Slc6a7;<br>Trpm3 | transport                                                        | Process   |
| 99  | chr3_35782698_3578<br>9932_R   | mitochondrial<br>inner membrane                                  | 0.000206825 | Abcb8; Atp5h; Cox15;<br>Cpt2; Etfdh; Gatm; Idh2;<br>Micu1; Slc25a42                                                                                                                                         | mitochondrial<br>inner membrane                                  | Component |
| 100 | chr3_40439525_4050<br>9975_R   | brush border<br>membrane                                         | 0.000475526 | Folr1; Lrp2; Pdzk1;<br>Shank2                                                                                                                                                                               | brush border<br>membrane                                         | Component |
| 101 | chr4_123572090_123<br>581365_F | pyroptosis                                                       | 0.000133164 | Casp4; Naip2                                                                                                                                                                                                | pyroptosis                                                       | Process   |
| 102 | chr4_123572090_123<br>581365_F | extracellular space                                              | 0.000138914 | Angptl4; Apln; Cx3cl1;<br>Dkk2; Frzb; Gdf5; Lrg1;<br>Selp; Timp1; Vcam1                                                                                                                                     | extracellular space                                              | Component |
| 103 | chr4_123572090_123<br>581365_F | negative regulation<br>of vasoconstriction                       | 0.000170968 | Apln; Cx3cl1                                                                                                                                                                                                | negative<br>regulation of<br>vasoconstriction                    | Process   |
| 104 | chr4_123572090_123<br>581365_F | negative regulation<br>of Wnt signaling<br>pathway               | 0.000174984 | Dkk2; Frzb; Six3                                                                                                                                                                                            | negative<br>regulation of Wnt<br>signaling pathway               | Process   |
| 105 | chr4_123572090_123<br>581365_F | response to virus                                                | 0.000351989 | Bcl3; Dhx58; Ifi2712a                                                                                                                                                                                       | response to virus                                                | Process   |
| 106 | chr4_35106125_3512<br>7700_F   | brush border<br>membrane                                         | 0.000147259 | Folr1; Pdzk1; Shank2;<br>Slc34a3                                                                                                                                                                            | brush border<br>membrane                                         | Component |
| 107 | chr4_35106125_3512<br>7700_F   | regulation of body<br>fluid levels                               | 0.00046353  | Apln; Aplnr                                                                                                                                                                                                 | regulation of body<br>fluid levels                               | Process   |
| 108 | chr4_88745771_8877<br>6323_F   | brush border<br>membrane                                         | 0.000332299 | Folr1; Lrp2; Pdzk1;<br>Shank2                                                                                                                                                                               | brush border<br>membrane                                         | Component |

|     |                                |                                 |             |                                                                                                                                                                                                                                                 |                                 |           |
|-----|--------------------------------|---------------------------------|-------------|-------------------------------------------------------------------------------------------------------------------------------------------------------------------------------------------------------------------------------------------------|---------------------------------|-----------|
| 109 | chr5_110182844_110<br>228345_R | apical plasma<br>membrane       | 0.000204999 | Gp2; Lrp2; P2ry1; Pdzk1;<br>Podxl; Rab17; Shank2;<br>Slc34a3; Slc39a4<br>Angptl4; Anxa13; Apln;<br>Ctsz; Cx3cl1; Dkk2;                                                                                                                          | apical plasma<br>membrane       | Component |
| 110 | chr5_137392195_137<br>426421_F | extracellular space             | 0.000175445 | Fabp3; Frzb; Il1rn; Kng2;<br>Lgals3bp; Lrg1; Npy;<br>Pla2g7; Prtn3; S100b;<br>Selp; Spp1; Vcam1                                                                                                                                                 | extracellular space             | Component |
| 111 | chr5_149751979_149<br>808240_F | apical plasma<br>membrane       | 0.000213417 | Gp2; Lrp2; Pdzk1; Podxl;<br>Rab17; Shank2; Slc34a3;<br>Slc39a4                                                                                                                                                                                  | apical plasma<br>membrane       | Component |
| 112 | chr5_31883451_3188<br>4082_F   | brush border<br>membrane        | 0.000350557 | Folr1; Lrp2; Pdzk1;<br>Shank2                                                                                                                                                                                                                   | brush border<br>membrane        | Component |
| 113 | chr5_35893908_3589<br>6613_R   | apical plasma<br>membrane       | 0.000113297 | Gp2; Lrp2; P2ry1; Pdzk1;<br>Podxl; Rab17; Shank2;<br>Slc34a3; Slc39a4                                                                                                                                                                           | apical plasma<br>membrane       | Component |
| 114 | chr5_35893908_3589<br>6613_R   | transport                       | 0.000272756 | Abcb8; Abcg3; Apoc1;<br>Aqp4; Atp5h; Chmp4c;<br>Cpt2; Etfdh; Folr1; Grid2;<br>Grik3; Kcnk4; Kcnq4;<br>Mcoln3; Micu1; Pdzk1;<br>Pex14; Pitpnc1; Rab17;<br>Slc10a5; Slc17a9;<br>Slc22a23; Slc25a1;<br>Slc25a5; Slc34a3; Slc39a4;<br>Slc6a7; Trpm3 | transport                       | Process   |
| 115 | chr5_35893908_3589<br>6613_R   | mitochondrial<br>inner membrane | 0.000368306 | Abcb8; Atp5h; Cox15;<br>Cpt2; Etfdh; Gatm; Idh2;<br>Micu1; Slc25a1; Slc25a5<br>Abcb8; Abcg3; Apoc1;<br>Aqp4; Atp5h; Chmp4c;<br>Cpt2; Etfdh; Grid2; Kcnk4;<br>Kcnq4; Mcoln3; Pdzk1;                                                              | mitochondrial<br>inner membrane | Component |
| 116 | chr5_54053882_5405<br>4174_F   | transport                       | 0.000182655 | Pex14; Pitpnc1; Rab17;<br>Slc10a5; Slc17a9;<br>Slc22a23; Slc25a42;<br>Slc25a5; Slc34a3; Slc39a4;<br>Slc6a7; Trnm3                                                                                                                               | transport                       | Process   |
| 117 | chr6_37630192_3768<br>2692_R   | receptor binding                | 0.000299096 | Apln; Galp; Gdf5; Kng2;<br>Pex14; S100b; Six3; Tg;<br>Wnt8a                                                                                                                                                                                     | receptor binding                | Function  |
| 118 | chr6_47959825_4796<br>0502_R   | transport                       | 0.000138404 | Abcb8; Abcg3; Aqp4;<br>Atp5h; Chmp4c; Cpt2;<br>Etfdh; Fabp3; Folr1;<br>Grid2; Grik3; Kcnk4;<br>Kcnq4; Mcoln3; Micu1;<br>Mup20; Pdzk1; Pex14;<br>Pitpnc1; Rab17; Slc10a5;<br>Slc17a9; Slc22a23;<br>Slc25a5; Slc39a4; Slc6a7;<br>Trpm3            | transport                       | Process   |
| 119 | chr6_47959825_4796<br>0502_R   | transporter activity            | 0.000267239 | Aqp4; Fabp3; Grid2;<br>Mup20; Slc17a9;<br>Slc22a23; Slc25a5                                                                                                                                                                                     | transporter<br>activity         | Function  |
| 120 | chr6_86425510_8645<br>0160_F   | extracellular space             | 0.000187294 | Angptl4; Ctsz; Cxcl1;<br>Dkk2; Gdf5; Lrg1; Selp;<br>Timp1; Vcam1                                                                                                                                                                                | extracellular space             | Component |

|     |                            |                              |             |                                                                                                                                                                                                                    |                              |           |
|-----|----------------------------|------------------------------|-------------|--------------------------------------------------------------------------------------------------------------------------------------------------------------------------------------------------------------------|------------------------------|-----------|
| 121 | chr6_86425510_86450160_F   | response to virus            | 0.000216375 | Bcl3; Dhx58; Ifi2712a                                                                                                                                                                                              | response to virus            | Process   |
| 122 | chr7_133402766_133415516_R | mitochondrial inner membrane | 0.000224283 | Abcb8; Atp5h; Cox15; Cpt2; Etfdh; Gatm; Idh2; Micu1; Slc25a1; Slc25a5                                                                                                                                              | mitochondrial inner membrane | Component |
| 123 | chr7_134372392_134372943_R | mitochondrial inner membrane | 0.000175483 | Abcb8; Atp5h; Cox15; Cpt2; Gatm; Idh2; Micu1; Slc25a1; Slc25a5                                                                                                                                                     | mitochondrial inner membrane | Component |
| 124 | chr7_134372392_134372943_R | apical plasma membrane       | 0.000498152 | Gp2; Lrp2; P2ry1; Pdzk1; Podxl; Rab17; Slc39a4                                                                                                                                                                     | apical plasma membrane       | Component |
| 125 | chr7_26212709_26230775_F   | receptor binding             | 0.000381473 | Apln; Galp; Gdf5; Kng2; Pex14; S100b; Six3; Tg; Wnt8a                                                                                                                                                              | receptor binding             | Function  |
| 126 | chr7_31709550_31723025_F   | transport                    | 0.000187142 | Abcb8; Abcg3; Apoc1; Aqp4; Atp5h; Chmp4c; Cpt2; Etfdh; Fabp3; Folr1; Grid2; Grik3; Kcnk4; Kcnq4; Mcoln3; Micu1; Pdzk1; Pex14; Pitpnc1; Rab17; Slc10a5; Slc17a9; Slc22a23; Slc25a1; Slc25a5; Slc39a4; Slc6a7; Trpm3 | transport                    | Process   |
| 127 | chr7_31709550_31723025_F   | mitochondrial inner membrane | 0.000308952 | Abcb8; Atp5h; Cox15; Cpt2; Etfdh; Gatm; Idh2; Micu1; Slc25a1; Slc25a5                                                                                                                                              | mitochondrial inner membrane | Component |
| 128 | chr7_82902248_82955248_F   | mitochondrial inner membrane | 0.000106263 | Abcb8; Atp5h; Cox15; Cpt2; Etfdh; Gatm; Idh2; Micu1; Slc25a1; Slc25a42; Slc25a5                                                                                                                                    | mitochondrial inner membrane | Component |
| 129 | chr7_82902248_82955248_F   | transport                    | 0.000122237 | Abcb8; Abcg3; Atp5h; Chmp4c; Cpt2; Etfdh; Fabp3; Folr1; Grik3; Kcnk4; Kcnq4; Mcoln3; Micu1; Mup20; Pdzk1; Pex14; Pitpnc1; Rab17; Slc10a5; Slc17a9; Slc25a1; Slc25a42; Slc25a5; Slc39a4; Slc6a7; Trpm3              | transport                    | Process   |
| 130 | chr7_96640618_96649018_F   | mitochondrial inner membrane | 0.000185336 | Abcb8; Atp5h; Cox15; Cpt2; Etfdh; Gatm; Idh2; Micu1; Prkar2b; Slc25a5                                                                                                                                              | mitochondrial inner membrane | Component |
| 131 | chr7_96640618_96649018_F   | transport                    | 0.000369785 | Abcb8; Abcg3; Apoc1; Aqp4; Atp5h; Chmp4c; Cpt2; Etfdh; Grid2; Grik3; Kcnk4; Kcnq4; Mcoln3; Micu1; Pdzk1; Pex14; Pitpnc1; Rab17; Slc10a5; Slc17a9; Slc22a23; Slc25a5; Slc34a3; Slc39a4; Slc6a7; Trpm3               | transport                    | Process   |
| 132 | chr8_108153471_108159672_F | PDZ domain binding           | 0.000418354 | Grid2; Kirrel3; Lrp2; Pdzk1; Ushbp1                                                                                                                                                                                | PDZ domain binding           | Function  |
| 133 | chr8_108153471_108159672_F | receptor activity            | 0.000478696 | Cd200r4; Folr1; Grid2; Grik3; Lrp2; Plxna4                                                                                                                                                                         | receptor activity            | Function  |

|     |                                |                                   |             |                                                                                                                                                                                                              |                                   |           |
|-----|--------------------------------|-----------------------------------|-------------|--------------------------------------------------------------------------------------------------------------------------------------------------------------------------------------------------------------|-----------------------------------|-----------|
| 134 | chr8_119732348_119<br>749198_R | brush border<br>membrane          | 0.000379277 | Folr1; Lrp2; Pdzk1;<br>Shank2                                                                                                                                                                                | brush border<br>membrane          | Component |
| 135 | chr8_123901815_123<br>902167_R | transport                         | 0.000220669 | Abcb8; Aqp4; Atp5h;<br>Chmp4c; Cpt2; Etfdh;<br>Fabp3; Grid2; Grik3;<br>Kcnk4; Kcnq4; Mcoln3;<br>Micu1; Mup20; Pdzk1;<br>Pitpnc1; Rab17; Slc10a5;<br>Slc25a1; Slc25a42;<br>Slc25a5; Slc39a4; Slc6a7;<br>Trpm3 | transport                         | Process   |
| 136 | chr8_126396600_126<br>407275_R | receptor activity                 | 0.000458996 | Cd200r4; Folr1; Grid2;<br>Grik3; Lrp2; Plxna4                                                                                                                                                                | receptor activity                 | Function  |
| 137 | chr8_129102060_129<br>109035_F | transport                         | 0.000406931 | Abcb8; Abcg3; Atp5h;<br>Chmp4c; Cpt2; Etfdh;<br>Fabp3; Folr1; Grid2;<br>Grik3; Kcnk4; Kcnq4;<br>Mcoln3; Micu1; Pdzk1;<br>Pex14; Pitpnc1; Rab17;<br>Slc10a5; Slc17a9; Slc39a4;<br>Slc6a7; Trpm3               | transport                         | Process   |
| 138 | chr8_26345571_2634<br>6095_R   | apical plasma<br>membrane         | 0.000213417 | Gp2; Lrp2; Pdzk1; Podxl;<br>Rab17; Shank2; Slc34a3;<br>Slc39a4                                                                                                                                               | apical plasma<br>membrane         | Component |
| 139 | chr8_48476637_4849<br>2537_F   | extracellular space               | 0.000191639 | Anxa13; Apln; Cx3cl1;<br>Cxcl1; Dkk2; Frzb; Ggt1;<br>Il1rn; Lgals3bp; Lrg1;<br>Npy; Prtn3; S100b; Selp;<br>Spp1; Tg; Timp1; Vcam1                                                                            | extracellular space               | Component |
| 140 | chr8_48476637_4849<br>2537_R   | IPAF<br>inflammasome<br>complex   | 0.000121578 | Casp4; Naip2                                                                                                                                                                                                 | IPAF<br>inflammasome<br>complex   | Component |
| 141 | chr8_48476637_4849<br>2537_R   | pyroptosis                        | 0.000226102 | Casp4; Naip2                                                                                                                                                                                                 | pyroptosis                        | Process   |
| 142 | chr8_48476637_4849<br>2537_R   | extracellular space               | 0.000311429 | Angptl4; Ctsz; Cx3cl1;<br>Dkk2; Frzb; Lgals3bp;<br>Lrg1; Pla2g7; Selp; Spp1;<br>Vcam1                                                                                                                        | extracellular space               | Component |
| 143 | chr8_96983590_9699<br>4419_F   | IPAF<br>inflammasome<br>complex   | 0.000230723 | Casp4; Naip2                                                                                                                                                                                                 | IPAF<br>inflammasome<br>complex   | Component |
| 144 | chr8_96983590_9699<br>4419_F   | amine metabolic<br>process        | 0.000230723 | Cyp1a1; Vcam1                                                                                                                                                                                                | amine metabolic<br>process        | Process   |
| 145 | chr8_96983590_9699<br>4419_F   | dipeptidyl-<br>peptidase activity | 0.000322178 | Dpep2; Dpp10                                                                                                                                                                                                 | dipeptidyl-<br>peptidase activity | Function  |
| 146 | chr8_96983590_9699<br>4419_F   | immune system<br>process          | 0.00035114  | Cd180; Cd300ld; Clec7a;<br>Dhx58; Mefv; Naip2;<br>Themis2                                                                                                                                                    | immune system<br>process          | Process   |
| 147 | chr8_96983590_9699<br>4419_F   | pyroptosis                        | 0.000428461 | Casp4; Naip2                                                                                                                                                                                                 | pyroptosis                        | Process   |
| 148 | chr8_96983590_9699<br>4419_F   | neutrophil<br>chemotaxis          | 0.000496914 | Cx3cl1; Cxcl1; Spp1                                                                                                                                                                                          | neutrophil<br>chemotaxis          | Process   |

|     |                            |                                                        |             |                                                                                                                                                                                                               |                                                        |           |
|-----|----------------------------|--------------------------------------------------------|-------------|---------------------------------------------------------------------------------------------------------------------------------------------------------------------------------------------------------------|--------------------------------------------------------|-----------|
| 149 | chr9_121845920_121858120_F | transport                                              | 0.000153241 | Abcb8; Abcg3; Apoc1; Aqp4; Atp5h; Chmp4c; Cpt2; Etfdh; Grid2; Grik3; Kcnk4; Kcnq4; Mcoln3; Micu1; Pdzk1; Pex14; Pitpnc1; Rab17; Slc10a5; Slc17a9; Slc22a23; Slc25a1; Slc25a5; Slc34a3; Slc39a4; Slc6a7; Trpm3 | transport                                              | Process   |
| 150 | chr9_121845920_121858120_F | mitochondrial inner membrane                           | 0.000185336 | Abcb8; Atp5h; Cox15; Cpt2; Etfdh; Gatm; Idh2; Micu1; Slc25a1; Slc25a5                                                                                                                                         | mitochondrial inner membrane                           | Component |
| 151 | chr9_121845920_121858120_F | apical plasma membrane                                 | 0.000337522 | Gp2; Lrp2; Pdzk1; Podxl; Rab17; Shank2; Slc34a3; Slc39a4                                                                                                                                                      | apical plasma membrane                                 | Component |
| 152 | chr9_14480441_14483362_F   | apical plasma membrane                                 | 0.000222857 | Gp2; Lrp2; Pdzk1; Podxl; Rab17; Shank2; Slc34a3; Slc39a4                                                                                                                                                      | apical plasma membrane                                 | Component |
| 153 | chr9_27148989_27155714_R   | fatty acid beta-oxidation using acyl-CoA dehydrogenase | 0.000207069 | Acad11; Etfdh                                                                                                                                                                                                 | fatty acid beta-oxidation using acyl-CoA dehydrogenase | Process   |
| 154 | chr9_27148989_27155714_R   | mitochondrion                                          | 0.000292908 | Abcb8; Acad11; Adhfe1; Atp5h; Chchd10; Cox15; Cpt2; Etfdh; Gatm; Hspe1; Idh2; P2ry1; Slc25a1; Slc25a42; Slc25a5; Xaf1                                                                                         | mitochondrion                                          | Component |
| 155 | chr9_27148989_27155714_R   | transport                                              | 0.000367971 | Abcb8; Atp5h; Chmp4c; Cpt2; Etfdh; Fabp3; Grid2; Kcnk4; Mcoln3; Mup20; Pdzk1; Pitpnc1; Rab17; Slc25a1; Slc25a42; Slc25a5; Trpm3                                                                               | transport                                              | Process   |
| 156 | chr9_27155685_27156100_F   | transport                                              | 0.000316186 | Chmp4c; Cpt2; Etfdh; Fabp3; Grid2; Kcnk4; Mup20; Pitpnc1; Rab17; Slc25a1; Slc25a42; Slc25a5; Trpm3                                                                                                            | transport                                              | Process   |
| 157 | chr9_4260788_4261404_F     | receptor activity                                      | 0.000190134 | Cd200r4; Folr1; Grid2; Grik3; Lrp2; Plxna4                                                                                                                                                                    | receptor activity                                      | Function  |
| 158 | chr9_56646768_56649068_R   | transport                                              | 0.000185805 | Abcb8; Abcg3; Apoc1; Atp5h; Chmp4c; Cpt2; Folr1; Grid2; Grik3; Kcnk4; Kcnq4; Mcoln3; Micu1; Mup20; Pdzk1; Pex14; Pitpnc1; Rab17; Slc10a5; Slc17a9; Slc22a23; Slc25a1; Slc25a5; Slc39a4; Slc6a7; Trpm3         | transport                                              | Process   |
| 159 | chr9_68349343_68411643_R   | PDZ domain binding                                     | 0.000465558 | Grid2; Kirrel3; Lrp2; Pdzk1; Ushbp1                                                                                                                                                                           | PDZ domain binding                                     | Function  |

|     |                                |                                 |             |                                                                                                                                                                                                                                                                            |                                 |           |
|-----|--------------------------------|---------------------------------|-------------|----------------------------------------------------------------------------------------------------------------------------------------------------------------------------------------------------------------------------------------------------------------------------|---------------------------------|-----------|
| 160 | chrX_102568332_10<br>2587093_R | brush border<br>membrane        | 0.000314733 | Lrp2; Pdzk1; Shank2;<br>Slc34a3                                                                                                                                                                                                                                            | brush border<br>membrane        | Component |
| 161 | chrX_165792277_16<br>5807952_R | brush border<br>membrane        | 0.000106455 | Folr1; Lrp2; Pdzk1;<br>Shank2; Slc34a3                                                                                                                                                                                                                                     | brush border<br>membrane        | Component |
| 162 | chrX_165792277_16<br>5807952_R | transport                       | 0.000113935 | Abcb8; Abcg3; Apoc1;<br>Aqp4; Atp5h; Chmp4c;<br>Cpt2; Etfdh; Fabp3; Folr1;<br>Grid2; Grik3; Kcnk4;<br>Kcnq4; Mcoln3; Micu1;<br>Mup20; Pdzk1; Pex14;<br>Pitpnc1; Rab17; Slc10a5;<br>Slc17a9; Slc22a23;<br>Slc25a1; Slc25a42;<br>Slc25a5; Slc34a3; Slc39a4;<br>Slc6a7; Trpm3 | transport                       | Process   |
| 163 | chrX_165792277_16<br>5807952_R | mitochondrial<br>inner membrane | 0.000187108 | Abcb8; Atp5h; Cox15;<br>Cpt2; Etfdh; Gatm; Idh2;<br>Micu1; Slc25a1; Slc25a42;<br>Slc25a5                                                                                                                                                                                   | mitochondrial<br>inner membrane | Component |
| 164 | chrX_165792277_16<br>5807952_R | apical plasma<br>membrane       | 0.000229265 | Gp2; Lrp2; P2ry1; Pdzk1;<br>Podxl; Rab17; Shank2;<br>Slc34a3; Slc39a4                                                                                                                                                                                                      | apical plasma<br>membrane       | Component |
| 165 | chrX_18734106_187<br>44367_R   | brush border<br>membrane        | 0.000359951 | Lrp2; Pdzk1; Shank2;<br>Slc34a3                                                                                                                                                                                                                                            | brush border<br>membrane        | Component |
| 166 | ENSMUST00000125<br>309         | brush border<br>membrane        | 0.000111518 | Folr1; Lrp2; Pdzk1;<br>Shank2; Slc34a3                                                                                                                                                                                                                                     | brush border<br>membrane        | Component |
| 167 | ENSMUST00000125<br>309         | transport                       | 0.00013708  | Abcb8; Abcg3; Apoc1;<br>Aqp4; Atp5h; Chmp4c;<br>Cpt2; Etfdh; Fabp3; Folr1;<br>Grid2; Grik3; Kcnk4;<br>Kcnq4; Mcoln3; Micu1;<br>Mup20; Pdzk1; Pex14;<br>Pitpnc1; Rab17; Slc10a5;<br>Slc17a9; Slc22a23;<br>Slc25a1; Slc25a42;<br>Slc25a5; Slc34a3; Slc39a4;<br>Slc6a7; Trpm3 | transport                       | Process   |
| 168 | ENSMUST00000125<br>309         | mitochondrial<br>inner membrane | 0.000203919 | Abcb8; Atp5h; Cox15;<br>Cpt2; Etfdh; Gatm; Idh2;<br>Micu1; Slc25a1; Slc25a42;<br>Slc25a5                                                                                                                                                                                   | mitochondrial<br>inner membrane | Component |
| 169 | ENSMUST00000125<br>309         | apical plasma<br>membrane       | 0.000246731 | Gp2; Lrp2; P2ry1; Pdzk1;<br>Podxl; Rab17; Shank2;<br>Slc34a3; Slc39a4                                                                                                                                                                                                      | apical plasma<br>membrane       | Component |
| 170 | ENSMUST00000130<br>677         | PDZ domain<br>binding           | 0.000450599 | Frzb; Grid2; Kirrel3; Lrp2;<br>Pdzk1; Ushbp1                                                                                                                                                                                                                               | PDZ domain<br>binding           | Function  |
| 171 | ENSMUST00000141<br>575         | transport                       | 0.000154079 | Abcb8; Abcg3; Apoc1;<br>Aqp4; Atp5h; Chmp4c;<br>Cpt2; Etfdh; Folr1; Grid2;<br>Grik3; Kcnk4; Kcnq4;<br>Mcoln3; Micu1; Pdzk1;<br>Pex14; Pitpnc1; Rab17;<br>Slc10a5; Slc17a9;<br>Slc22a23; Slc25a1;<br>Slc25a5; Slc34a3; Slc39a4;<br>Slc6a7; Trpm3                            | transport                       | Process   |

|     |                    |                                                      |             |                                                                                                                                                                                                      |                                                      |           |
|-----|--------------------|------------------------------------------------------|-------------|------------------------------------------------------------------------------------------------------------------------------------------------------------------------------------------------------|------------------------------------------------------|-----------|
| 172 | ENSMUST00000141575 | mitochondrial inner membrane                         | 0.000282414 | Abcb8; Atp5h; Cox15; Cpt2; Etfdh; Gatm; Idh2; Micu1; Slc25a1; Slc25a5                                                                                                                                | mitochondrial inner membrane                         | Component |
| 173 | ENSMUST00000141575 | apical plasma membrane                               | 0.000478122 | Gp2; Lrp2; Pdzk1; Podxl; Rab17; Shank2; Slc34a3; Slc39a4                                                                                                                                             | apical plasma membrane                               | Component |
| 174 | ENSMUST00000149707 | amine metabolic process                              | 0.000211698 | Cyp1a1; Vcam1                                                                                                                                                                                        | amine metabolic process                              | Process   |
| 175 | ENSMUST00000149707 | IPAF inflammasome complex                            | 0.000211698 | Casp4; Naip2                                                                                                                                                                                         | IPAF inflammasome complex                            | Component |
| 176 | ENSMUST00000149707 | pyroptosis                                           | 0.000393218 | Casp4; Naip2                                                                                                                                                                                         | pyroptosis                                           | Process   |
| 177 | ENSMUST00000149707 | negative regulation of interleukin-1 beta production | 0.000504317 | Acp5; Mefv                                                                                                                                                                                           | negative regulation of interleukin-1 beta production | Process   |
| 178 | ENSMUST00000150216 | brush border membrane                                | 0.000487198 | Folr1; Lrp2; Pdzk1; Shank2                                                                                                                                                                           | brush border membrane                                | Component |
| 179 | ENSMUST00000155173 | brush border membrane                                | 0.000306205 | Lrp2; Pdzk1; Shank2; Slc34a3                                                                                                                                                                         | brush border membrane                                | Component |
| 180 | ENSMUST00000157205 | apical plasma membrane                               | 0.000275339 | Gp2; Lrp2; Pdzk1; Podxl; Rab17; Shank2; Slc34a3; Slc39a4                                                                                                                                             | apical plasma membrane                               | Component |
| 181 | ENSMUST00000158863 | brush border membrane                                | 0.000289647 | Folr1; Lrp2; Pdzk1; Shank2                                                                                                                                                                           | brush border membrane                                | Component |
| 182 | ENSMUST00000163396 | brush border membrane                                | 0.000441707 | Folr1; Lrp2; Pdzk1; Shank2                                                                                                                                                                           | brush border membrane                                | Component |
| 183 | ENSMUST00000174110 | transport                                            | 0.000185805 | Abcb8; Abcg3; Apoc1; Aqp4; Atp5h; Chmp4c; Cpt2; Etfdh; Fabp3; Grid2; Grik3; Kenk4; Kenq4; Mcoln3; Micu1; Pdzk1; Pitpnc1; Rab17; Slc10a5; Slc17a9; Slc25a1; Slc25a42; Slc25a5; Slc39a4; Slc6a7; Trpm3 | transport                                            | Process   |
| 184 | ENSMUST00000180590 | regulation of body fluid levels                      | 0.000400935 | Apln; Aplnr                                                                                                                                                                                          | regulation of body fluid levels                      | Process   |
| 185 | ENSMUST00000181887 | brush border membrane                                | 0.000389213 | Folr1; Lrp2; Shank2; Slc34a3                                                                                                                                                                         | brush border membrane                                | Component |
| 186 | FR000724           | regulation of body fluid levels                      | 0.000431674 | Apln; Aplnr                                                                                                                                                                                          | regulation of body fluid levels                      | Process   |
| 187 | FR000826           | IPAF inflammasome complex                            | 0.000107841 | Casp4; Naip2                                                                                                                                                                                         | IPAF inflammasome complex                            | Component |
| 188 | FR000826           | pyroptosis                                           | 0.000200599 | Casp4; Naip2                                                                                                                                                                                         | pyroptosis                                           | Process   |
| 189 | FR000826           | negative regulation of interleukin-1 beta production | 0.000257462 | Acp5; Mefv                                                                                                                                                                                           | negative regulation of interleukin-1 beta production | Process   |
| 190 | FR000826           | immune system process                                | 0.000275826 | Cd300ld; Clec7a; Dhx58; Mefv; Naip2; Themis2                                                                                                                                                         | immune system process                                | Process   |



|     |          |                                                  |             |                                                                                                                                                                                                                                |                                                  |           |
|-----|----------|--------------------------------------------------|-------------|--------------------------------------------------------------------------------------------------------------------------------------------------------------------------------------------------------------------------------|--------------------------------------------------|-----------|
| 191 | FR000826 | extracellular vesicular exosome                  | 0.000397457 | Chmp4c; Cpn2; Ctsz; Fgl1; Ftl1; Gatm; Il1rn; Lgals3bp; Lrg1; Naip2; Rap2c; Rnf149; Sirpb1a; Slc25a5; Spp1; Vcam1                                                                                                               | extracellular vesicular exosome                  | Component |
| 192 | FR000826 | cell adhesion                                    | 0.00045945  | Cx3cl1; Lgals3bp; Nrp2; Sdc3; Selp; Spp1; Vcam1                                                                                                                                                                                | cell adhesion                                    | Process   |
| 193 | FR000826 | negative regulation of interleukin-12 production | 0.00046954  | Acp5; Mefv                                                                                                                                                                                                                     | negative regulation of interleukin-12 production | Process   |
| 194 | FR001084 | brush border membrane                            | 0.00017373  | Lrp2; Pdzk1; Shank2; Slc34a3                                                                                                                                                                                                   | brush border membrane                            | Component |
| 195 | FR001084 | regulation of body fluid levels                  | 0.000504919 | Apln; Aplnr                                                                                                                                                                                                                    | regulation of body fluid levels                  | Process   |
| 196 | FR001172 | mitochondrial inner membrane                     | 0.000230201 | Abcb8; Atp5h; Cox15; Cpt2; Gatm; Idh2; Micu1; Slc25a1; Slc25a5                                                                                                                                                                 | mitochondrial inner membrane                     | Component |
| 197 | FR003529 | apical plasma membrane                           | 0.000162837 | Gp2; Lrp2; P2ry1; Pdzk1; Podxl; Rab17; Shank2; Slc34a3; Slc39a4                                                                                                                                                                | apical plasma membrane                           | Component |
| 198 | FR003529 | transport                                        | 0.000268021 | Abcb8; Abcg3; Apoc1; Aqp4; Atp5h; Chmp4c; Cpt2; Etfhd; Fabp3; Grid2; Grik3; Kcnk4; Kcnq4; Mcoln3; Micu1; Pdzk1; Pexl4; Pitpnc1; Rab17; Slc10a5; Slc17a9; Slc22a23; Slc25a1; Slc25a42; Slc25a5; Slc34a3; Slc39a4; Slc6a7; Trpm3 | transport                                        | Process   |
| 199 | FR003529 | PDZ domain binding                               | 0.000382745 | Frzb; Grid2; Kirrel3; Lrp2; Pdzk1; Ushbp1                                                                                                                                                                                      | PDZ domain binding                               | Function  |
| 200 | FR007551 | brush border membrane                            | 0.00013071  | Folr1; Lrp2; Pdzk1; Shank2; Slc34a3                                                                                                                                                                                            | brush border membrane                            | Component |
| 201 | FR007551 | apical plasma membrane                           | 0.000316794 | Gp2; Lrp2; P2ry1; Pdzk1; Podxl; Rab17; Shank2; Slc34a3; Slc39a4                                                                                                                                                                | apical plasma membrane                           | Component |
| 202 | FR007551 | extracellular space                              | 0.000318464 | Angptl4; Apln; Bpifa1; Ctsz; Cxcl1; Dkk2; Gdf5; Ggt1; Il1rn; Kng2; Lgals3bp; Lrg1; Lrp2; Npy; Pigr; Pla2g7; Prtn3; S100b; Selp; Tg; Timp1; Vcam1                                                                               | extracellular space                              | Component |
| 203 | FR010306 | mitochondrial inner membrane                     | 0.000298388 | Abcb8; Atp5h; Cox15; Cpt2; Gatm; Idh2; Micu1; Slc25a1; Slc25a5                                                                                                                                                                 | mitochondrial inner membrane                     | Component |

|     |          |                                                      |             |                                                                                                                                                                                                                                   |                                             |           |
|-----|----------|------------------------------------------------------|-------------|-----------------------------------------------------------------------------------------------------------------------------------------------------------------------------------------------------------------------------------|---------------------------------------------|-----------|
| 204 | FR016598 | transport                                            | 0.000138404 | Abcb8; Abcg3; Apoc1;<br>Aqp4; Atp5h; Chmp4c;<br>Cpt2; Etfdh; Fabp3; Folr1;<br>Grid2; Grik3; Kcnk4;<br>Kcnq4; Mcoln3; Micu1;<br>Pdzk1; Pex14; Pitpnc1;<br>Rab17; Slc10a5; Slc17a9;<br>Slc22a23; Slc25a5;<br>Slc39a4; Slc6a7; Trpm3 | transport                                   | Process   |
| 205 | FR017535 | transporter activity                                 | 0.000257636 | Aqp4; Fabp3; Grid2;<br>Mup20; Slc17a9;<br>Slc22a23; Slc25a5                                                                                                                                                                       | transporter activity                        | Function  |
| 206 | FR028133 | mitochondrion                                        | 0.000226421 | Adhfe1; Cox15; Cpt2;<br>Cyp1a1; Etfdh; Gatm;<br>Hspe1; Idh2; Micu1;<br>P2ry1; Slc25a1; Slc25a42;<br>Slc25a5; Snph                                                                                                                 | mitochondrion                               | Component |
| 207 | FR028809 | mitochondrial inner membrane                         | 0.000463055 | Abcb8; Atp5h; Cox15;<br>Cpt2; Gatm; Idh2; Micu1;<br>Slc25a1; Slc25a5                                                                                                                                                              | mitochondrial inner membrane                | Component |
| 208 | FR029539 | IPAF inflammasome complex                            | 0.000189057 | Casp4; Naip2                                                                                                                                                                                                                      | IPAF inflammasome complex                   | Component |
| 209 | FR029539 | pyroptosis                                           | 0.000351261 | Casp4; Naip2                                                                                                                                                                                                                      | pyroptosis                                  | Process   |
| 210 | FR029539 | external side of plasma membrane                     | 0.000364487 | Aqp4; Clec7a; Ly6g; Selp;<br>Slamf7; Vcam1                                                                                                                                                                                        | external side of plasma membrane            | Component |
| 211 | FR029539 | negative regulation of interleukin-1 beta production | 0.000450568 | Acp5; Aqp4                                                                                                                                                                                                                        | regulation of interleukin-1 beta production | Process   |
| 212 | FR032503 | PDZ domain binding                                   | 0.000310062 | Grid2; Kirrel3; Lrp2;<br>Pdzk1; Ushbp1                                                                                                                                                                                            | PDZ domain binding                          | Function  |
| 213 | FR032503 | receptor activity                                    | 0.000338156 | Cd200r4; Folr1; Grid2;<br>Grik3; Lrp2; Plxna4                                                                                                                                                                                     | receptor activity                           | Function  |
| 214 | FR032503 | regulation of body fluid levels                      | 0.000504919 | Apln; Aplnr                                                                                                                                                                                                                       | regulation of body fluid levels             | Process   |
| 215 | FR034857 | apical plasma membrane                               | 0.000284755 | Gp2; Lrp2; P2ry1; Pdzk1;<br>Podxl; Rab17; Slc39a4                                                                                                                                                                                 | apical plasma membrane                      | Component |
| 216 | FR034857 | PDZ domain binding                                   | 0.000374856 | Grid2; Kirrel3; Lrp2;<br>Pdzk1; Ushbp1                                                                                                                                                                                            | PDZ domain binding                          | Function  |
| 217 | FR034857 | receptor activity                                    | 0.000421496 | Cd200r4; Folr1; Grid2;<br>Grik3; Lrp2; Plxna4                                                                                                                                                                                     | receptor activity                           | Function  |
| 218 | FR034857 | mitochondrial inner membrane                         | 0.000474306 | Abcb8; Cox15; Cpt2;<br>Gatm; Idh2; Micu1;<br>Slc25a1; Slc25a5                                                                                                                                                                     | mitochondrial inner membrane                | Component |
| 219 | FR042390 | apical plasma membrane                               | 0.000455748 | Gp2; Lrp2; P2ry1; Pdzk1;<br>Podxl; Rab17; Slc39a4                                                                                                                                                                                 | apical plasma membrane                      | Component |
| 220 | FR044110 | IPAF inflammasome complex                            | 0.000132417 | Casp4; Naip2                                                                                                                                                                                                                      | IPAF inflammasome complex                   | Component |
| 221 | FR044110 | pyroptosis                                           | 0.000246218 | Casp4; Naip2                                                                                                                                                                                                                      | pyroptosis                                  | Process   |
| 222 | FR044110 | extracellular space                                  | 0.000454788 | Angptl4; Ctsz; Cx3cl1;<br>Dkk2; Frzb; Lgals3bp;<br>Lrg1; Pla2g7; Selp; Spp1;<br>Vcam1                                                                                                                                             | extracellular space                         | Component |

|     |          |                                                        |             |                                                                                                                                                                                                                           |                                                        |           |
|-----|----------|--------------------------------------------------------|-------------|---------------------------------------------------------------------------------------------------------------------------------------------------------------------------------------------------------------------------|--------------------------------------------------------|-----------|
| 223 | FR046015 | negative regulation of interleukin-1 beta production   | 0.00034282  | Acp5; Mefv                                                                                                                                                                                                                | negative regulation of interleukin-1 beta production   | Process   |
| 224 | FR047247 | PDZ domain binding                                     | 0.00016942  | Frzb; Grid2; Kirrel3; Lrp2; Pdzk1; Ushbp1                                                                                                                                                                                 | PDZ domain binding                                     | Function  |
| 225 | FR047247 | apical plasma membrane                                 | 0.000298978 | Gp2; Lrp2; Pdzk1; Podxl; Rab17; Shank2; Slc34a3; Slc39a4                                                                                                                                                                  | apical plasma membrane                                 | Component |
| 226 | FR049065 | mitochondrial inner membrane                           | 0.000255729 | Abcb8; Atp5h; Cox15; Cpt2; Etfdh; Gatm; Idh2; Micu1; Slc25a42                                                                                                                                                             | mitochondrial inner membrane                           | Component |
| 227 | FR052210 | PDZ domain binding                                     | 0.000347818 | Grid2; Kirrel3; Lrp2; Pdzk1; Ushbp1                                                                                                                                                                                       | PDZ domain binding                                     | Function  |
| 228 | FR052210 | receptor activity                                      | 0.000386432 | Cd200r4; Folr1; Grid2; Grik3; Lrp2; Plxna4                                                                                                                                                                                | receptor activity                                      | Function  |
| 229 | FR054246 | apical plasma membrane                                 | 0.000496305 | Lrp2; P2ry1; Pdzk1; Podxl; Rab17; Shank2; Slc34a3; Slc39a4                                                                                                                                                                | apical plasma membrane                                 | Component |
| 230 | FR055065 | PDZ domain binding                                     | 0.000279291 | Frzb; Grid2; Kirrel3; Lrp2; Pdzk1; Ushbp1                                                                                                                                                                                 | PDZ domain binding                                     | Function  |
| 231 | FR055102 | transport                                              | 0.000491914 | Abcb8; Abcg3; Apoc1; Aqp4; Atp5h; Chmp4c; Cpt2; Etfdh; Fabp3; Folr1; Grid2; Grik3; Kcnk4; Kcnq4; Mcoln3; Micu1; Mup20; Pdzk1; Pex14; Pitpnc1; Rab17; Slc10a5; Slc17a9; Slc22a23; Slc25a1; Slc25a5; Slc39a4; Slc6a7; Trpm3 | transport                                              | Process   |
| 232 | FR057053 | brush border membrane                                  | 0.000399334 | Folr1; Lrp2; Pdzk1; Shank2                                                                                                                                                                                                | brush border membrane                                  | Component |
| 233 | FR057875 | regulation of body fluid levels                        | 0.000328987 | Apln; Aplnr                                                                                                                                                                                                               | regulation of body fluid levels                        | Process   |
| 234 | FR060087 | extracellular space                                    | 0.000123162 | Angptl4; Apln; Ctsz; Cx3c11; Dkk2; Frzb; Il1rn; Lgals3bp; Lrg1; Npy; Pla2g7; S100b; Selp; Spp1; Vcam1                                                                                                                     | extracellular space                                    | Component |
| 235 | FR060087 | fatty acid beta-oxidation using acyl-CoA dehydrogenase | 0.00029265  | Acad11; Etfdh                                                                                                                                                                                                             | fatty acid beta-oxidation using acyl-CoA dehydrogenase | Process   |
| 236 | FR060087 | IAPF inflammasome complex                              | 0.00029265  | Casp4; Naip2                                                                                                                                                                                                              | IAPF inflammasome complex                              | Component |

|     |          |                                                                  |             |                                                                                                                                                                                                                          |                                                                  |           |
|-----|----------|------------------------------------------------------------------|-------------|--------------------------------------------------------------------------------------------------------------------------------------------------------------------------------------------------------------------------|------------------------------------------------------------------|-----------|
| 237 | FR061730 | transport                                                        | 0.000185805 | Abcb8; Abcg3; Apoc1;<br>Aqp4; Atp5h; Chmp4c;<br>Cpt2; Etfdh; Fabp3; Folr1;<br>Grid2; Grik3; Kcnk4;<br>Kcnq4; Mcoln3; Micu1;<br>Pdzk1; Pex14; Pitpnc1;<br>Rab17; Slc10a5; Slc17a9;<br>Slc22a23; Slc39a4; Slc6a7;<br>Trpm3 | transport                                                        | Process   |
| 238 | FR064590 | brush border<br>membrane                                         | 0.000323431 | Lrp2; Pdzk1; Shank2;<br>Slc34a3                                                                                                                                                                                          | brush border<br>membrane                                         | Component |
| 239 | FR064953 | mitochondrial<br>inner membrane                                  | 0.000100922 | Atp5h; Cpt2; Etfdh; Gatm;<br>Prkar2b; Slc25a1;<br>Slc25a42; Slc25a5                                                                                                                                                      | mitochondrial<br>inner membrane                                  | Component |
| 240 | FR064953 | fatty acid beta-<br>oxidation using<br>acyl-CoA<br>dehydrogenase | 0.000250557 | Acad11; Etfdh                                                                                                                                                                                                            | fatty acid beta-<br>oxidation using<br>acyl-CoA<br>dehydrogenase | Process   |
| 241 | FR064953 | IPAF<br>inflammasome<br>complex                                  | 0.000250557 | Casp4; Naip2                                                                                                                                                                                                             | IPAF<br>inflammasome<br>complex                                  | Component |
| 242 | FR064953 | immune system<br>process                                         | 0.00045141  | Cd180; Cd300ld; Clec7a;<br>Dhx58; Mefv; Naip2;<br>Themis2                                                                                                                                                                | immune system<br>process                                         | Process   |
| 243 | FR064953 | pyroptosis                                                       | 0.000465191 | Casp4; Naip2                                                                                                                                                                                                             | pyroptosis                                                       | Process   |
| 244 | FR065159 | regulation of body<br>fluid levels                               | 0.000504919 | Apln; Aplnr                                                                                                                                                                                                              | regulation of body<br>fluid levels                               | Process   |
| 245 | FR071800 | fatty acid beta-<br>oxidation using<br>acyl-CoA<br>dehydrogenase | 0.000111199 | Acad11; Etfdh                                                                                                                                                                                                            | fatty acid beta-<br>oxidation using<br>acyl-CoA<br>dehydrogenase | Process   |
| 246 | FR074898 | PDZ domain<br>binding                                            | 0.000388956 | Grid2; Kirrel3; Lrp2;<br>Pdzk1; Ushbp1                                                                                                                                                                                   | PDZ domain<br>binding                                            | Function  |
| 247 | FR074898 | receptor activity                                                | 0.000439935 | Cd200r4; Folr1; Grid2;<br>Grik3; Lrp2; Plxna4                                                                                                                                                                            | receptor activity                                                | Function  |
| 248 | FR082156 | extracellular space                                              | 0.000115289 | Angptl4; Anxa13; Apln;<br>Ctsz; Cx3cl1; Dkk2; Frzb;<br>Ggt1; Il1rn; Kng2;<br>Lgals3bp; Npy; Pigr;<br>Pla2g7; Prtn3; S100b;<br>Selp; Spp1; Vcam1; Wnt8a                                                                   | extracellular space                                              | Component |
| 249 | FR082156 | mitochondrial<br>inner membrane                                  | 0.000194494 | Abcb8; Atp5h; Cox15;<br>Cpt2; Etfdh; Gatm; Idh2;<br>Prkar2b; Slc25a42;<br>Slc25a5                                                                                                                                        | mitochondrial<br>inner membrane                                  | Component |
| 250 | FR085857 | transcytosis                                                     | 0.000290161 | Rab17; Tg                                                                                                                                                                                                                | transcytosis                                                     | Process   |
| 251 | FR086793 | mitochondrial<br>inner membrane                                  | 0.000380605 | Abcb8; Cox15; Cpt2;<br>Gatm; Idh2; Micu1;<br>Slc25a1; Slc25a5                                                                                                                                                            | mitochondrial<br>inner membrane                                  | Component |
| 252 | FR087537 | mitochondrial<br>inner membrane                                  | 0.000337542 | Abcb8; Atp5h; Cox15;<br>Cpt2; Etfdh; Gatm; Idh2;<br>Micu1; Slc25a42; Slc25a5                                                                                                                                             | mitochondrial<br>inner membrane                                  | Component |

|     |          |                                                        |             |                                                                                                                                         |                                                        |           |
|-----|----------|--------------------------------------------------------|-------------|-----------------------------------------------------------------------------------------------------------------------------------------|--------------------------------------------------------|-----------|
| 253 | FR087537 | transporter activity                                   | 0.000434649 | Aqp4; Fabp3; Grid2;<br>Mup20; Slc17a9;<br>Slc22a23; Slc25a5                                                                             | transporter activity                                   | Function  |
| 254 | FR087735 | brush border membrane                                  | 0.000464055 | Folr1; Lrp2; Pdzk1;<br>Shank2                                                                                                           | brush border membrane                                  | Component |
| 255 | FR087925 | mitochondrial inner membrane                           | 0.000117411 | Abcb8; Cox15; Cpt2;<br>Etfdh; Gatm; Idh2; Micu1;<br>Slc25a1; Slc25a5                                                                    | mitochondrial inner membrane                           | Component |
| 256 | FR087925 | apical plasma membrane                                 | 0.000362234 | Gp2; Lrp2; P2ry1; Pdzk1;<br>Podxl; Rab17; Slc39a4                                                                                       | apical plasma membrane                                 | Component |
| 257 | FR087925 | PDZ domain binding                                     | 0.0004494   | Grid2; Kirrel3; Lrp2;<br>Pdzk1; Ushbp1                                                                                                  | PDZ domain binding                                     | Function  |
| 258 | FR090778 | amine metabolic process                                | 0.000143714 | Cyp1a1; Vcam1                                                                                                                           | amine metabolic process                                | Process   |
| 259 | FR090778 | IPAF inflammasome complex                              | 0.000143714 | Casp4; Naip2                                                                                                                            | IPAF inflammasome complex                              | Component |
| 260 | FR090778 | pyroptosis                                             | 0.00026718  | Casp4; Naip2                                                                                                                            | pyroptosis                                             | Process   |
| 261 | FR090778 | negative regulation of interleukin-1 beta production   | 0.00034282  | Acp5; Mefv                                                                                                                              | negative regulation of interleukin-1 beta production   | Process   |
| 262 | FR090859 | PDZ domain binding                                     | 0.000334867 | Grid2; Kirrel3; Lrp2;<br>Pdzk1; Ushbp1                                                                                                  | PDZ domain binding                                     | Function  |
| 263 | FR090859 | receptor activity                                      | 0.000369777 | Cd200r4; Folr1; Grid2;<br>Grik3; Lrp2; Plxna4                                                                                           | receptor activity                                      | Function  |
| 264 | FR099681 | receptor activity                                      | 0.000458996 | Cd200r4; Folr1; Grid2;<br>Grik3; Lrp2; Plxna4                                                                                           | receptor activity                                      | Function  |
| 265 | FR100205 | fatty acid beta-oxidation using acyl-CoA dehydrogenase | 0.000132417 | Acad11; Etfdh                                                                                                                           | fatty acid beta-oxidation using acyl-CoA dehydrogenase | Process   |
| 266 | FR106089 | IPAF inflammasome complex                              | 0.000114608 | Casp4; Naip2                                                                                                                            | IPAF inflammasome complex                              | Component |
| 267 | FR106089 | extracellular vesicular exosome                        | 0.000178643 | Chmp4c; Cpn2; Ctsz; Fgl1;<br>Ftl1; Il1rn; Lgals3bp;<br>Lrg1; Naip2; Rab17;<br>Rap2c; Rnf149; Sirpb1a;<br>Slc25a5; Spp1; Timp1;<br>Vcam1 | extracellular vesicular exosome                        | Component |
| 268 | FR106089 | pyroptosis                                             | 0.000213162 | Casp4; Naip2<br>Angpt4; Ctsz; Cxcl1;<br>Il1rn; Lgals3bp; Lrg1;                                                                          | pyroptosis                                             | Process   |
| 269 | FR106089 | extracellular space                                    | 0.000238752 | Pla2g7; Selp; Spp1;<br>Timp1; Vcam1                                                                                                     | extracellular space                                    | Component |
| 270 | FR112324 | brush border membrane                                  | 0.000399334 | Folr1; Lrp2; Pdzk1;<br>Shank2                                                                                                           | brush border membrane                                  | Component |
| 271 | FR114000 | PDZ domain binding                                     | 0.000347818 | Grid2; Kirrel3; Lrp2;<br>Pdzk1; Ushbp1                                                                                                  | PDZ domain binding                                     | Function  |
| 272 | FR114000 | receptor activity                                      | 0.000386432 | Cd200r4; Folr1; Grid2;<br>Grik3; Lrp2; Plxna4                                                                                           | receptor activity                                      | Function  |
| 273 | FR117744 | apical plasma membrane                                 | 0.000435655 | Gp2; Lrp2; P2ry1; Pdzk1;<br>Podxl; Rab17; Slc39a4                                                                                       | apical plasma membrane                                 | Component |

|     |          |                                                        |             |                                                                                                                                                                               |                                                        |           |
|-----|----------|--------------------------------------------------------|-------------|-------------------------------------------------------------------------------------------------------------------------------------------------------------------------------|--------------------------------------------------------|-----------|
| 274 | FR117799 | transport                                              | 0.000266348 | Abcb8; Abcg3; Atp5h; Chmp4c; Cpt2; Fabp3; Folr1; Grid2; Grik3; Kcnk4; Kcnq4; Mcoln3; Micu1; Mup20; Pdzk1; Pitpnc1; Rab17; Slc10a5; Slc17a9; Slc25a5; Slc39a4; Slc6a7; Trpm3   | transport                                              | Process   |
| 275 | FR120704 | mitochondrial inner membrane                           | 0.000230201 | Abcb8; Atp5h; Cox15; Cpt2; Gatm; Idh2; Micu1; Slc25a1; Slc25a5                                                                                                                | mitochondrial inner membrane                           | Component |
| 276 | FR120704 | transport                                              | 0.00036677  | Abcb8; Abcg3; Apoc1; Atp5h; Chmp4c; Cpt2; Folr1; Grid2; Grik3; Kcnk4; Kcnq4; Mcoln3; Micu1; Pdzk1; Pitpnc1; Rab17; Slc10a5; Slc17a9; Slc25a1; Slc25a5; Slc39a4; Slc6a7; Trpm3 | transport                                              | Process   |
| 277 | FR124060 | regulation of body fluid levels                        | 0.000289187 | Apln; Aplnr                                                                                                                                                                   | regulation of body fluid levels                        | Process   |
| 278 | FR124060 | receptor binding                                       | 0.000306791 | Apln; Galp; Kng2; Pex14; S100b; Six3; Wnt8a                                                                                                                                   | receptor binding                                       | Function  |
| 279 | FR125080 | receptor binding                                       | 0.000439296 | Apln; Galp; Gdf5; Kng2; Pex14; S100b; Six3; Tg; Wnt8a                                                                                                                         | receptor binding                                       | Function  |
| 280 | FR129526 | brush border membrane                                  | 0.000266031 | Lrp2; Pdzk1; Shank2; Slc34a3                                                                                                                                                  | brush border membrane                                  | Component |
| 281 | FR139436 | apical plasma membrane                                 | 0.000498152 | Gp2; Lrp2; P2ry1; Pdzk1; Podxl; Rab17; Slc39a4                                                                                                                                | apical plasma membrane                                 | Component |
| 282 | FR142459 | fatty acid beta-oxidation using acyl-CoA dehydrogenase | 0.000147582 | Acad11; Etfdh                                                                                                                                                                 | fatty acid beta-oxidation using acyl-CoA dehydrogenase | Process   |
| 283 | FR142459 | transport                                              | 0.000147794 | Abcb8; Atp5h; Chmp4c; Cpt2; Etfdh; Fabp3; Grid2; Kcnk4; Mcoln3; Mup20; Pitpnc1; Rab17; Slc25a1; Slc25a42; Slc25a5; Trpm3                                                      | transport                                              | Process   |
| 284 | FR142459 | semaphorin receptor activity                           | 0.000439117 | Nrp2; Plxna4                                                                                                                                                                  | semaphorin receptor activity                           | Function  |
| 285 | FR149067 | PDZ domain binding                                     | 0.000361146 | Grid2; Kirrel3; Lrp2; Pdzk1; Ushbp1                                                                                                                                           | PDZ domain binding                                     | Function  |
| 286 | FR149067 | receptor activity                                      | 0.000403666 | Cd200r4; Folr1; Grid2; Grik3; Lrp2; Plxna4                                                                                                                                    | receptor activity                                      | Function  |
| 287 | FR150621 | receptor binding                                       | 0.000127303 | Apln; Galp; Gdf5; Kng2; Pex14; S100b; Six3; Tg; Wnt8a                                                                                                                         | receptor binding                                       | Function  |
| 288 | FR152607 | brush border membrane                                  | 0.000420139 | Folr1; Lrp2; Shank2; Slc34a3                                                                                                                                                  | brush border membrane                                  | Component |
| 289 | FR155648 | fatty acid beta-oxidation using acyl-CoA dehydrogenase | 0.000216379 | Acad11; Etfdh                                                                                                                                                                 | fatty acid beta-oxidation using acyl-CoA dehydrogenase | Process   |

|     |          |                                                        |             |                                                                                                                                                                                           |                                                        |           |
|-----|----------|--------------------------------------------------------|-------------|-------------------------------------------------------------------------------------------------------------------------------------------------------------------------------------------|--------------------------------------------------------|-----------|
| 290 | FR155648 | regulation of body fluid levels                        | 0.000302172 | Apln; Aplnr                                                                                                                                                                               | regulation of body fluid levels                        | Process   |
| 291 | FR160504 | apical plasma membrane                                 | 0.000410708 | Gp2; Lrp2; P2ry1; Pdzk1; Podxl; Rab17; Shank2; Slc39a4                                                                                                                                    | apical plasma membrane                                 | Component |
| 292 | FR167447 | IPAF inflammasome complex                              | 0.00029265  | Casp4; Naip2                                                                                                                                                                              | IPAF inflammasome complex                              | Component |
| 293 | FR167447 | fatty acid beta-oxidation using acyl-CoA dehydrogenase | 0.00029265  | Acad11; Etfdh                                                                                                                                                                             | fatty acid beta-oxidation using acyl-CoA dehydrogenase | Process   |
| 294 | FR168142 | PDZ domain binding                                     | 0.000347818 | Grid2; Kirrel3; Lrp2; Pdzk1; Ushbp1                                                                                                                                                       | PDZ domain binding                                     | Function  |
| 295 | FR168142 | receptor activity                                      | 0.000386432 | Cd200r4; Folr1; Grid2; Grik3; Lrp2; Plxna4                                                                                                                                                | receptor activity                                      | Function  |
| 296 | FR168758 | regulation of body fluid levels                        | 0.000423885 | Apln; Aplnr                                                                                                                                                                               | regulation of body fluid levels                        | Process   |
| 297 | FR177295 | PDZ domain binding                                     | 0.000138449 | Frzb; Grid2; Kirrel3; Lrp2; Pdzk1; Ushbp1                                                                                                                                                 | PDZ domain binding                                     | Function  |
| 298 | FR180118 | IPAF inflammasome complex                              | 0.000101279 | Casp4; Naip2                                                                                                                                                                              | IPAF inflammasome complex                              | Component |
| 299 | FR180118 | extracellular space                                    | 0.000135465 | Angpt4; Ctsz; Cx3cl1; Dkk2; Frzb; Lgals3bp; Lrg1; Pla2g7; Selp; Spp1; Vcam1                                                                                                               | extracellular space                                    | Component |
| 300 | FR180118 | pyroptosis                                             | 0.000188414 | Casp4; Naip2                                                                                                                                                                              | pyroptosis                                             | Process   |
| 301 | FR180118 | cell adhesion                                          | 0.000378716 | Cx3cl1; Lgals3bp; Nrp2; Sdc3; Selp; Spp1; Vcam1                                                                                                                                           | cell adhesion                                          | Process   |
| 302 | FR184042 | extracellular region                                   | 0.000462451 | 1700029I15Rik; Angptl4; Apoc1; Bpifa1; Cma1; Cpn2; Cx3cl1; Cxcl1; Defb28; Dkk2; Fgl1; Frzb; Galp; Gdf5; Il1rn; Lgals3bp; Lipf; Mup20; Npy; Pla2g10; Pla2g7; S100b; Spp1; Tg; Timp1; Wnt8a | extracellular region                                   | Component |
| 303 | FR184042 | inflammatory response                                  | 0.000503796 | Cd180; Clec7a; Cxcl1; Mefv; Naip2; Pla2g7; Selp; Themis2                                                                                                                                  | inflammatory response                                  | Process   |
| 304 | FR187810 | transport                                              | 0.000335348 | Abcb8; Abcg3; Atp5h; Chmp4c; Cpt2; Etfdh; Fabp3; Folr1; Grid2; Grik3; Kcnk4; Mcoln3; Micu1; Mup20; Pdzk1; Pitpnc1; Rab17; Slc10a5; Slc17a9; Slc25a1; Slc25a5; Slc39a4; Slc6a7; Trpm3      | transport                                              | Process   |

|     |          |                                 |             |                                                                                                                                                                                                    |                                 |           |
|-----|----------|---------------------------------|-------------|----------------------------------------------------------------------------------------------------------------------------------------------------------------------------------------------------|---------------------------------|-----------|
| 305 | FR194887 | extracellular vesicular exosome | 0.000254564 | Chmp4c; Cnksr2; Cpn2; Dpp6; Fgl1; Ftl1; Gatm; Il1rn; Lgals3bp; Lrg1; Naip2; Pdzk1; Phgdh; Prtn3; Rab17; Rap2c; Rnf149; Serinc2; Sirpb1a; Slc25a5; Spp1; Timp1; Vcam1                               | extracellular vesicular exosome | Component |
| 306 | FR194887 | IPAF inflammasome complex       | 0.000298138 | Casp4; Naip2                                                                                                                                                                                       | IPAF inflammasome complex       | Component |
| 307 | FR194887 | amine metabolic process         | 0.000298138 | Cyp1a1; Vcam1                                                                                                                                                                                      | amine metabolic process         | Process   |
| 308 | FR194887 | regulation of body fluid levels | 0.000416165 | Apln; Aplnr                                                                                                                                                                                        | regulation of body fluid levels | Process   |
| 309 | FR199374 | brush border membrane           | 0.000350557 | Folr1; Lrp2; Pdzk1; Shank2                                                                                                                                                                         | brush border membrane           | Component |
| 310 | FR202182 | PDZ domain binding              | 0.000334867 | Grid2; Kirrel3; Lrp2; Pdzk1; Ushbp1                                                                                                                                                                | PDZ domain binding              | Function  |
| 311 | FR202182 | receptor activity               | 0.000369777 | Cd200r4; Folr1; Grid2; Grik3; Lrp2; Plxna4                                                                                                                                                         | receptor activity               | Function  |
| 312 | FR203009 | apical plasma membrane          | 0.000232636 | Gp2; Lrp2; P2ry1; Pdzk1; Podxl; Rab17; Shank2; Slc39a4                                                                                                                                             | apical plasma membrane          | Component |
| 313 | FR204953 | apical plasma membrane          | 0.000380026 | Gp2; Lrp2; P2ry1; Pdzk1; Podxl; Rab17; Shank2; Slc39a4                                                                                                                                             | apical plasma membrane          | Component |
| 314 | FR215148 | regulation of body fluid levels | 0.000496502 | Apln; Aplnr                                                                                                                                                                                        | regulation of body fluid levels | Process   |
| 315 | FR215734 | mitochondrial inner membrane    | 0.000124272 | Abcb8; Atp5h; Cox15; Cpt2; Etfdh; Gatm; Idh2; Micu1; Slc25a1; Slc25a5                                                                                                                              | mitochondrial inner membrane    | Component |
| 316 | FR215734 | transport                       | 0.000167639 | Abcb8; Abcg3; Apoc1; Atp5h; Chmp4c; Cpt2; Etfdh; Fabp3; Folr1; Grid2; Grik3; Kcnk4; Kcnq4; Mcoln3; Micu1; Mup20; Pdzk1; Pitpnc1; Rab17; Slc10a5; Slc17a9; Slc25a1; Slc25a5; Slc39a4; Slc6a7; Trpm3 | transport                       | Process   |
| 317 | FR219193 | apical plasma membrane          | 0.000237865 | Gp2; Lrp2; P2ry1; Pdzk1; Podxl; Rab17; Shank2; Slc34a3; Slc39a4                                                                                                                                    | apical plasma membrane          | Component |
| 318 | FR230183 | transport                       | 0.000245488 | Abcb8; Abcg3; Aqp4; Atp5h; Chmp4c; Cpt2; Etfdh; Fabp3; Folr1; Grid2; Grik3; Kcnk4; Kcnq4; Mcoln3; Micu1; Pdzk1; Pex14; Pitpnc1; Rab17; Slc10a5; Slc17a9; Slc39a4; Slc6a7; Trpm3                    | transport                       | Process   |
| 319 | FR234548 | brush border membrane           | 0.000289647 | Folr1; Lrp2; Pdzk1; Shank2                                                                                                                                                                         | brush border membrane           | Component |



|     |          |                                                        |             |                                                                                                                                                                                                             |                                                        |           |
|-----|----------|--------------------------------------------------------|-------------|-------------------------------------------------------------------------------------------------------------------------------------------------------------------------------------------------------------|--------------------------------------------------------|-----------|
| 320 | FR237950 | PDZ domain binding                                     | 0.00012919  | Frzb; Grid2; Kirrel3; Lrp2; Pdzk1; Ushbp1                                                                                                                                                                   | PDZ domain binding                                     | Function  |
| 321 | FR238898 | mitochondrial inner membrane                           | 0.000128161 | Abcb8; Atp5h; Cox15; Cpt2; Etfdh; Gatm; Idh2; Micu1; Prkar2b; Slc25a1; Slc25a42; Slc25a5                                                                                                                    | mitochondrial inner membrane                           | Component |
| 322 | FR238898 | brush border membrane                                  | 0.000184056 | Folr1; Lrp2; Pdzk1; Shank2; Slc34a3                                                                                                                                                                         | brush border membrane                                  | Component |
| 323 | FR238898 | extracellular region                                   | 0.000435703 | Abhd15; Angptl4; Apoc1; Bpifa1; Cma1; Cpn2; Cxcl1; Defb28; Dkk2; Fgl1; Folr1; Frzb; Galp; Gdf5; Gp2; Il1rn; Kirrel3; Lao1; Lgals3bp; Lipf; Mup20; Npy; Pigr; Pla2g10; Pla2g7; S100b; Spp1; Tg; Timp1; Wnt8a | extracellular region                                   | Component |
| 324 | FR247760 | PDZ domain binding                                     | 0.000296238 | Frzb; Grid2; Kirrel3; Lrp2; Pdzk1; Ushbp1                                                                                                                                                                   | PDZ domain binding                                     | Function  |
| 325 | FR249432 | brush border membrane                                  | 0.000341341 | Folr1; Lrp2; Pdzk1; Shank2                                                                                                                                                                                  | brush border membrane                                  | Component |
| 326 | FR263105 | IPAF inflammasome complex                              | 0.000465309 | Casp4; Naip2                                                                                                                                                                                                | IPAF inflammasome complex                              | Component |
| 327 | FR263105 | amine metabolic process                                | 0.000465309 | Cyp1a1; Vcam1                                                                                                                                                                                               | amine metabolic process                                | Process   |
| 328 | FR266999 | mitochondrial inner membrane                           | 0.00028356  | Abcb8; Atp5h; Cox15; Cpt2; Gatm; Idh2; Micu1; Slc25a1; Slc25a5                                                                                                                                              | mitochondrial inner membrane                           | Component |
| 329 | FR269524 | fatty acid beta-oxidation using acyl-CoA dehydrogenase | 0.000118067 | Acad11; Etfdh                                                                                                                                                                                               | fatty acid beta-oxidation using acyl-CoA dehydrogenase | Process   |
| 330 | FR269524 | transport                                              | 0.00013597  | Abcb8; Atp5h; Chmp4c; Cpt2; Etfdh; Fabp3; Grid2; Kcnk4; Mup20; Pdzk1; Pex14; Pitpnc1; Rab17; Slc25a42; Trpm3                                                                                                | transport                                              | Process   |
| 331 | FR273612 | fatty acid beta-oxidation using acyl-CoA dehydrogenase | 0.000431597 | Acad11; Etfdh                                                                                                                                                                                               | fatty acid beta-oxidation using acyl-CoA dehydrogenase | Process   |
| 332 | FR278883 | extracellular space                                    | 0.000246213 | Angptl4; Apln; Cx3cl1; Cxcl1; Dkk2; Frzb; Gdf5; Il1rn; Kng2; Lgals3bp; Lrg1; Npy; Prtn3; S100b; Selp; Tg; Timp1; Vcam1                                                                                      | extracellular space                                    | Component |
| 333 | FR278883 | extracellular region                                   | 0.000307397 | Angptl4; Apln; Cx3cl1; Cxcl1; Dkk2; Fgl1; Folr1; Frzb; Galp; Gdf5; Il1rn; Lao1; Lgals3bp; Lipf; Npy; Pla2g10; S100b; Tg; Timp1                                                                              | extracellular region                                   | Component |

|     |          |                                                      |             |                                                                                                                               |                                             |           |
|-----|----------|------------------------------------------------------|-------------|-------------------------------------------------------------------------------------------------------------------------------|---------------------------------------------|-----------|
| 334 | FR278883 | brush border membrane                                | 0.000441707 | Folr1; Pdzk1; Shank2; Slc34a3                                                                                                 | brush border membrane                       | Component |
| 335 | FR279378 | mitochondrial inner membrane                         | 0.000168103 | Abcb8; Atp5h; Cox15; Cpt2; Etfdh; Gatm; Idh2; Micu1; Slc25a42; Slc25a5                                                        | mitochondrial inner membrane                | Component |
| 336 | FR279378 | transporter activity                                 | 0.000257636 | Aqp4; Fabp3; Grid2; Mup20; Slc17a9; Slc22a23; Slc25a5                                                                         | transporter activity                        | Function  |
| 337 | FR279905 | brush border membrane                                | 0.000399334 | Lrp2; Pdzk1; Shank2; Slc34a3                                                                                                  | brush border membrane                       | Component |
| 338 | FR283082 | mitochondrial inner membrane                         | 0.000364271 | Abcb8; Atp5h; Cox15; Cpt2; Etfdh; Gatm; Idh2; Micu1; Slc25a42                                                                 | mitochondrial inner membrane                | Component |
| 339 | FR283503 | pyroptosis                                           | 0.000182463 | Casp4; Naip2                                                                                                                  | pyroptosis                                  | Process   |
| 340 | FR283503 | inflammatory response                                | 0.000349412 | Clec7a; Cxcl1; Naip2; Pla2g7; Selp                                                                                            | inflammatory response                       | Process   |
| 341 | FR283504 | mitochondrial inner membrane                         | 0.000361352 | Abcb8; Atp5h; Cox15; Cpt2; Etfdh; Gatm; Idh2; Micu1; Slc25a1; Slc25a42; Slc25a5                                               | mitochondrial inner membrane                | Component |
| 342 | FR286933 | brush border membrane                                | 0.000289647 | Folr1; Lrp2; Pdzk1; Shank2                                                                                                    | brush border membrane                       | Component |
| 343 | FR287008 | brush border membrane                                | 0.000369523 | Folr1; Lrp2; Pdzk1; Shank2                                                                                                    | brush border membrane                       | Component |
| 344 | FR296035 | mitochondrial inner membrane                         | 0.000298388 | Abcb8; Atp5h; Cox15; Cpt2; Etfdh; Gatm; Idh2; Micu1; Slc25a5                                                                  | mitochondrial inner membrane                | Component |
| 345 | FR301533 | brush border membrane                                | 0.000332299 | Folr1; Lrp2; Pdzk1; Shank2                                                                                                    | brush border membrane                       | Component |
| 346 | FR301567 | PDZ domain binding                                   | 0.000254135 | Grid2; Kirrel3; Lrp2; Pdzk1; Ushbp1                                                                                           | PDZ domain binding                          | Function  |
| 347 | FR301567 | receptor activity                                    | 0.000268312 | Cd200r4; Folr1; Grid2; Grik3; Lrp2; Plxna4                                                                                    | receptor activity                           | Function  |
| 348 | FR301809 | PDZ domain binding                                   | 0.0004494   | Grid2; Kirrel3; Lrp2; Pdzk1; Ushbp1                                                                                           | PDZ domain binding                          | Function  |
| 349 | FR302003 | brush border membrane                                | 0.000332299 | Folr1; Lrp2; Pdzk1; Shank2                                                                                                    | brush border membrane                       | Component |
| 350 | FR302411 | apical plasma membrane                               | 0.000212838 | Gp2; Lrp2; P2ry1; Pdzk1; Podxl; Rab17; Shank2; Slc34a3; Slc39a4                                                               | apical plasma membrane                      | Component |
| 351 | FR302411 | PDZ domain binding                                   | 0.000462766 | Frzb; Grid2; Kirrel3; Lrp2; Pdzk1; Ushbp1                                                                                     | PDZ domain binding                          | Function  |
| 352 | FR312018 | extracellular vesicular exosome                      | 0.000117906 | Chmp4c; Cpn2; Ctsz; Dpp6; Fgl1; Ftl1; Gatm; Il1rn; Lgals3bp; Lrg1; Naip2; Rap2c; Rnf149; Sirpb1a; Slc25a5; Spp1; Timp1; Vcam1 | extracellular vesicular exosome             | Component |
| 353 | FR312018 | IPAF inflammasome complex                            | 0.000128753 | Casp4; Naip2                                                                                                                  | IPAF inflammasome complex                   | Component |
| 354 | FR312018 | pyroptosis                                           | 0.000239418 | Casp4; Naip2                                                                                                                  | pyroptosis                                  | Process   |
| 355 | FR312018 | negative regulation of interleukin-1 beta production | 0.000307233 | Acp5; Mefv                                                                                                                    | regulation of interleukin-1 beta production | Process   |

|     |          |                                                        |             |                                                                                                                                                                                                                                    |                                                        |           |
|-----|----------|--------------------------------------------------------|-------------|------------------------------------------------------------------------------------------------------------------------------------------------------------------------------------------------------------------------------------|--------------------------------------------------------|-----------|
| 356 | FR312018 | extracellular space                                    | 0.000401884 | Ctsz; Frzb; Il1rn;<br>Lgals3bp; Lrg1; Npy;<br>Pla2g7; Selp; Spp1;<br>Timp1; Vcam1                                                                                                                                                  | extracellular space                                    | Component |
| 357 | FR312820 | apical plasma membrane                                 | 0.000264107 | Gp2; Lrp2; Pdzk1; Podxl;<br>Rab17; Shank2; Slc34a3;<br>Slc39a4                                                                                                                                                                     | apical plasma membrane                                 | Component |
| 358 | FR325017 | mitochondrial inner membrane                           | 0.000144794 | Abcb8; Atp5h; Cox15;<br>Cpt2; Etfdh; Gatm; Idh2;<br>Micu1; Slc25a1; Slc25a5                                                                                                                                                        | mitochondrial inner membrane                           | Component |
| 359 | FR325017 | transport                                              | 0.000227457 | Abcb8; Abcg3; Apoc1;<br>Aqp4; Atp5h; Chmp4c;<br>Cpt2; Etfdh; Fabp3; Folr1;<br>Grid2; Grik3; Kcnk4;<br>Kcnq4; Mcoln3; Micu1;<br>Pdzk1; Pitpnc1; Rab17;<br>Slc10a5; Slc17a9; Slc25a1;<br>Slc25a5; Slc39a4; Slc6a7;<br>Trpm3          | transport                                              | Process   |
| 360 | FR326589 | mitochondrial inner membrane                           | 0.000269346 | Abcb8; Atp5h; Cox15;<br>Cpt2; Gatm; Idh2; Micu1;<br>Slc25a1; Slc25a5                                                                                                                                                               | mitochondrial inner membrane                           | Component |
| 361 | FR330268 | apical plasma membrane                                 | 0.000443375 | Gp2; Lrp2; P2ry1; Pdzk1;<br>Podxl; Rab17; Shank2;<br>Slc39a4                                                                                                                                                                       | apical plasma membrane                                 | Component |
| 362 | FR333763 | fatty acid beta-oxidation using acyl-CoA dehydrogenase | 0.000332126 | Acad11; Etfdh                                                                                                                                                                                                                      | fatty acid beta-oxidation using acyl-CoA dehydrogenase | Process   |
| 363 | FR333763 | dipeptidyl-peptidase activity                          | 0.00046353  | Dpep2; Dpp10                                                                                                                                                                                                                       | dipeptidyl-peptidase activity                          | Function  |
| 364 | FR334236 | transport                                              | 0.000135974 | Abcg3; Apoc1; Aqp4;<br>Chmp4c; Cpt2; Etfdh;<br>Fabp3; Folr1; Grid2;<br>Kcnk4; Kcnq4; Mcoln3;<br>Micu1; Pdzk1; Pex14;<br>Pitpnc1; Rab17; Slc10a5;<br>Slc17a9; Slc22a23;<br>Slc25a42; Slc25a5;<br>Slc34a3; Slc39a4; Slc6a7;<br>Trpm3 | transport                                              | Process   |
| 365 | FR337786 | mitochondrial inner membrane                           | 0.000206825 | Abcb8; Atp5h; Cox15;<br>Cpt2; Gatm; Idh2; Micu1;<br>Slc25a1; Slc25a5                                                                                                                                                               | mitochondrial inner membrane                           | Component |
| 366 | FR341317 | extracellular space                                    | 0.000233693 | Angptl4; Anxa13; Apln;<br>Bpifa1; Ctsz; Cx3cl1;<br>Dkk2; Fabp3; Frzb; Il1rn;<br>Kng2; Lgals3bp; Npy;<br>Pigr; Pla2g7; Prtn3; S100b;<br>Selp; Vcam1; Wnt8a                                                                          | extracellular space                                    | Component |
| 367 | FR341317 | apical plasma membrane                                 | 0.000496305 | Gp2; P2ry1; Pdzk1; Podxl;<br>Rab17; Shank2; Slc34a3;<br>Slc39a4                                                                                                                                                                    | apical plasma membrane                                 | Component |

|     |          |                                                        |             |                                                                                                                                                                                                |                                                        |           |
|-----|----------|--------------------------------------------------------|-------------|------------------------------------------------------------------------------------------------------------------------------------------------------------------------------------------------|--------------------------------------------------------|-----------|
| 368 | FR347914 | mitochondrial inner membrane                           | 0.00042119  | Abcb8; Atp5h; Cox15; Cpt2; Gatm; Idh2; Micu1; Slc25a1; Slc25a5                                                                                                                                 | mitochondrial inner membrane                           | Component |
| 369 | FR365932 | transport                                              | 0.00013217  | Abcb8; Abcg3; Atp5h; Chmp4c; Cpt2; Etfdh; Fabp3; Folr1; Grid2; Grik3; Kenk4; Mcoln3; Micu1; Mup20; Pdzk1; Pitpnc1; Rab17; Slc10a5; Slc17a9; Slc25a1; Slc25a42; Slc25a5; Slc39a4; Slc6a7; Trnm3 | transport                                              | Process   |
| 370 | FR366845 | PDZ domain binding                                     | 0.000433668 | Grid2; Kirrel3; Lrp2; Pdzk1; Ushbp1                                                                                                                                                            | PDZ domain binding                                     | Function  |
| 371 | FR366845 | receptor activity                                      | 0.000499048 | Cd200r4; Folr1; Grid2; Grik3; Lrp2; Plxna4                                                                                                                                                     | receptor activity                                      | Function  |
| 372 | FR374009 | PDZ domain binding                                     | 0.000465558 | Grid2; Kirrel3; Lrp2; Pdzk1; Ushbp1                                                                                                                                                            | PDZ domain binding                                     | Function  |
| 373 | FR375498 | brush border membrane                                  | 0.000389213 | Folr1; Lrp2; Pdzk1; Shank2                                                                                                                                                                     | brush border membrane                                  | Component |
| 374 | FR375933 | mitochondrion                                          | 0.000169909 | Abcb8; Adhfe1; Atp5h; Chchd10; Cox15; Cpt2; Etfdh; Gatm; Hspe1; Idh2; Micu1; Nme4; P2ry1; Slc25a1; Slc25a42; Slc25a5                                                                           | mitochondrion                                          | Component |
| 375 | FR375933 | apical plasma membrane                                 | 0.000249226 | Gp2; Lrp2; P2ry1; Pdzk1; Rab17; Slc39a4                                                                                                                                                        | apical plasma membrane                                 | Component |
| 376 | FR375933 | dipeptidyl-peptidase activity                          | 0.000264062 | Dpep2; Dpp10                                                                                                                                                                                   | dipeptidyl-peptidase activity                          | Function  |
| 377 | FR375933 | phospholipase activity                                 | 0.000268559 | Abhd15; Nceh1; Pla2g10                                                                                                                                                                         | phospholipase activity                                 | Function  |
| 378 | FR375933 | transcytosis                                           | 0.000450568 | Lrp2; Rab17                                                                                                                                                                                    | transcytosis                                           | Process   |
| 379 | FR380314 | fatty acid beta-oxidation using acyl-CoA dehydrogenase | 0.000314906 | Acad11; Etfdh                                                                                                                                                                                  | fatty acid beta-oxidation using acyl-CoA dehydrogenase | Process   |
| 380 | FR382833 | mitochondrial inner membrane                           | 0.000194494 | Abcb8; Atp5h; Cox15; Cpt2; Etfdh; Gatm; Idh2; Micu1; Slc25a1; Slc25a5                                                                                                                          | mitochondrial inner membrane                           | Component |
| 381 | FR382845 | mitochondrial inner membrane                           | 0.000195182 | Cox15; Cpt2; Etfdh; Idh2; Prkar2b; Slc25a42                                                                                                                                                    | mitochondrial inner membrane                           | Component |
| 382 | FR382845 | semaphorin receptor activity                           | 0.00025571  | Nrp2; Plxna4                                                                                                                                                                                   | semaphorin receptor activity                           | Function  |
| 383 | FR387804 | brush border membrane                                  | 0.000350557 | Folr1; Lrp2; Pdzk1; Shank2                                                                                                                                                                     | brush border membrane                                  | Component |
| 384 | FR388349 | IPAF inflammasome complex                              | 0.000139898 | Casp4; Naip2                                                                                                                                                                                   | IPAF inflammasome complex                              | Component |
| 385 | FR388349 | fatty acid beta-oxidation using acyl-CoA dehydrogenase | 0.000139898 | Acad11; Etfdh                                                                                                                                                                                  | fatty acid beta-oxidation using acyl-CoA dehydrogenase | Process   |
| 386 | FR388349 | pyroptosis                                             | 0.000260098 | Casp4; Naip2                                                                                                                                                                                   | pyroptosis                                             | Process   |
| 387 | FR394282 | PDZ domain binding                                     | 0.000243938 | Grid2; Kirrel3; Lrp2; Pdzk1; Ushbp1                                                                                                                                                            | PDZ domain binding                                     | Function  |

|     |          |                                                        |             |                                                                                                                                                                                           |                                                        |           |
|-----|----------|--------------------------------------------------------|-------------|-------------------------------------------------------------------------------------------------------------------------------------------------------------------------------------------|--------------------------------------------------------|-----------|
| 388 | FR394282 | recycling endosome membrane                            | 0.000306628 | Pigr; Rab17; Rap2c                                                                                                                                                                        | recycling endosome membrane                            | Component |
| 389 | FR396644 | IPAF inflammasome complex                              | 0.000392792 | Casp4; Naip2                                                                                                                                                                              | IPAF inflammasome complex                              | Component |
| 390 | FR398266 | fatty acid beta-oxidation using acyl-CoA dehydrogenase | 0.000132417 | Acad11; Etfdh                                                                                                                                                                             | fatty acid beta-oxidation using acyl-CoA dehydrogenase | Process   |
| 391 | FR398266 | heterophilic cell-cell adhesion                        | 0.00014542  | Grid2; Selp; Vcam1                                                                                                                                                                        | heterophilic cell-cell adhesion                        | Process   |
| 392 | FR398266 | blood microparticle                                    | 0.00025458  | Angptl4; Cpn2; Kng2; Lgals3bp                                                                                                                                                             | blood microparticle                                    | Component |
| 393 | FR398266 | semaphorin receptor activity                           | 0.00039417  | Nrp2; Plxna4                                                                                                                                                                              | semaphorin receptor activity                           | Function  |
| 394 | FR402142 | dipeptidyl-peptidase activity                          | 0.00014155  | Dpep2; Dpp10                                                                                                                                                                              | dipeptidyl-peptidase activity                          | Function  |
| 395 | Gomafu   | brush border membrane                                  | 0.000369523 | Folr1; Lrp2; Pdzk1; Shank2                                                                                                                                                                | brush border membrane                                  | Component |
| 396 | n263541  | transport                                              | 0.000276235 | Abcb8; Abcg3; Aqp4; Atp5h; Chmp4c; Cpt2; Etfdh; Fabp3; Folr1; Grid2; Grik3; Kcnk4; Kcnq4; Mcoln3; Micu1; Pdzk1; Pex14; Pitpnc1; Rab17; Slc10a5; Slc17a9; Slc22a23; Slc39a4; Slc6a7; Trpm3 | transport                                              | Process   |
| 397 | n263575  | fatty acid beta-oxidation using acyl-CoA dehydrogenase | 0.000458467 | Acad11; Etfdh                                                                                                                                                                             | fatty acid beta-oxidation using acyl-CoA dehydrogenase | Process   |
| 398 | n263685  | apical plasma membrane                                 | 0.000270994 | Gp2; Lrp2; P2ry1; Pdzk1; Podxl; Rab17; Slc39a4                                                                                                                                            | apical plasma membrane                                 | Component |
| 399 | n263685  | PDZ domain binding                                     | 0.000361146 | Grid2; Kirrel3; Lrp2; Pdzk1; Ushbp1                                                                                                                                                       | PDZ domain binding                                     | Function  |
| 400 | n263685  | receptor binding                                       | 0.000392917 | Apln; Gdf5; Kng2; Pex14; S100b; Six3; Tg; Wnt8a                                                                                                                                           | receptor binding                                       | Function  |
| 401 | n266159  | transport                                              | 0.000131492 | Abcb8; Apoc1; Aqp4; Atp5h; Chmp4c; Cpt2; Etfdh; Fabp3; Grid2; Kcnk4; Kcnq4; Mcoln3; Pdzk1; Pex14; Pitpnc1; Rab17; Slc10a5; Slc25a42; Slc25a5; Slc34a3; Trpm3                              | transport                                              | Process   |
| 402 | n266159  | regulation of body fluid levels                        | 0.000471669 | Apln; Aplnr                                                                                                                                                                               | regulation of body fluid levels                        | Process   |

|     |         |                                                        |             |                                                                                                                                                                                             |                                                        |           |
|-----|---------|--------------------------------------------------------|-------------|---------------------------------------------------------------------------------------------------------------------------------------------------------------------------------------------|--------------------------------------------------------|-----------|
| 403 | n271825 | transport                                              | 0.000161014 | Abcb8; Abcg3; Atp5h; Chmp4c; Cpt2; Fabp3; Grid2; Grik3; Kcnk4; Kcnq4; Mcoln3; Micu1; Pdzk1; Pitpnc1; Rab17; Slc10a5; Slc17a9; Slc25a1; Slc25a5; Slc39a4; Slc6a7; Trpm3                      | transport                                              | Process   |
| 404 | n271825 | apical plasma membrane                                 | 0.000299072 | Gp2; Lrp2; P2ry1; Pdzk1; Podxl; Rab17; Slc39a4                                                                                                                                              | apical plasma membrane                                 | Component |
| 405 | n271825 | PDZ domain binding                                     | 0.000388956 | Grid2; Kirrel3; Lrp2; Pdzk1; Ushbp1                                                                                                                                                         | PDZ domain binding                                     | Function  |
| 406 | n272641 | mitochondrial inner membrane                           | 0.000160006 | Atp5h; Cox15; Cpt2; Etfdh; Gatm; Idh2; Micu1; Prkar2b; Slc25a42; Slc25a5                                                                                                                    | mitochondrial inner membrane                           | Component |
| 407 | n272641 | transporter activity                                   | 0.000248313 | Aqp4; Fabp3; Grid2; Mup20; Slc17a9; Slc22a23; Slc25a5                                                                                                                                       | transporter activity                                   | Function  |
| 408 | n273954 | transport                                              | 0.000118347 | Abcb8; Abcg3; Apoc1; Aqp4; Atp5h; Chmp4c; Cpt2; Etfdh; Grid2; Grik3; Kcnk4; Kcnq4; Mcoln3; Micu1; Pdzk1; Pex14; Pitpnc1; Rab17; Slc10a5; Slc17a9; Slc22a23; Slc25a5; Slc39a4; Slc6a7; Trpm3 | transport                                              | Process   |
| 409 | n273954 | mitochondrial inner membrane                           | 0.000329973 | Abcb8; Atp5h; Cox15; Cpt2; Etfdh; Gatm; Idh2; Micu1; Slc25a5                                                                                                                                | mitochondrial inner membrane                           | Component |
| 410 | n280804 | brush border membrane                                  | 0.000369523 | Folr1; Lrp2; Pdzk1; Shank2                                                                                                                                                                  | brush border membrane                                  | Component |
| 411 | n280963 | IPAF inflammasome complex                              | 0.000132417 | Casp4; Naip2                                                                                                                                                                                | IPAF inflammasome complex                              | Component |
| 412 | n280963 | pyroptosis                                             | 0.000246218 | Casp4; Naip2                                                                                                                                                                                | pyroptosis                                             | Process   |
| 413 | n280963 | negative regulation of interleukin-1 beta production   | 0.00031595  | Acp5; Mefv                                                                                                                                                                                  | negative regulation of interleukin-1 beta production   | Process   |
| 414 | n280963 | immune system process                                  | 0.000481291 | Cd180; Cd300ld; Clec7a; Mefv; Naip2; Themis2                                                                                                                                                | immune system process                                  | Process   |
| 415 | n283487 | fatty acid beta-oxidation using acyl-CoA dehydrogenase | 0.00015547  | Acad11; Etfdh                                                                                                                                                                               | fatty acid beta-oxidation using acyl-CoA dehydrogenase | Process   |
| 416 | n283487 | regulation of body fluid levels                        | 0.000217199 | Apln; Aplnr                                                                                                                                                                                 | regulation of body fluid levels                        | Process   |
| 417 | n283487 | blood microparticle                                    | 0.000346157 | Angptl4; Cpn2; Kng2; Lgals3bp                                                                                                                                                               | blood microparticle                                    | Component |
| 418 | n283487 | negative regulation of interleukin-1 beta production   | 0.00037077  | Acp5; Aqp4                                                                                                                                                                                  | negative regulation of interleukin-1 beta production   | Process   |
| 419 | n283487 | negative regulation of vasoconstriction                | 0.00037077  | Apln; Cx3c11                                                                                                                                                                                | negative regulation of vasoconstriction                | Process   |

|     |         |                                                                          |             |                                                                                 |                                                                          |           |
|-----|---------|--------------------------------------------------------------------------|-------------|---------------------------------------------------------------------------------|--------------------------------------------------------------------------|-----------|
| 420 | n283793 | brush border membrane                                                    | 0.000297843 | Folr1; Lrp2; Pdzk1; Shank2                                                      | brush border membrane                                                    | Component |
| 421 | n289317 | PDZ domain binding                                                       | 0.000418354 | Grid2; Kirrel3; Lrp2; Pdzk1; Ushbp1                                             | PDZ domain binding                                                       | Function  |
| 422 | n289317 | receptor activity                                                        | 0.000478696 | Cd200r4; Folr1; Grid2; Grik3; Lrp2; Plxna4                                      | receptor activity                                                        | Function  |
| 423 | n289590 | fatty acid beta-oxidation using acyl-CoA dehydrogenase                   | 0.00012514  | Acad11; Etfdh                                                                   | fatty acid beta-oxidation using acyl-CoA dehydrogenase                   | Process   |
| 424 | n289590 | blood microparticle negative regulation of interleukin-1 beta production | 0.000228372 | Angptl4; Cpn2; Kng2; Lgals3bp                                                   | blood microparticle negative regulation of interleukin-1 beta production | Component |
| 425 | n289590 | extracellular space                                                      | 0.000298637 | Acp5; Aqp4                                                                      | extracellular space                                                      | Process   |
| 426 | n289590 | semaphorin receptor activity                                             | 0.000354239 | Angptl4; Bpifa1; Ctsz; Fabp3; Frzb; Kng2; Lgals3bp; Pla2g7; Prtn3; S100b; Wnt8a | semaphorin receptor activity                                             | Component |
| 427 | n289590 | mitochondrial inner membrane                                             | 0.000372591 | Nrp2; Plxna4                                                                    | mitochondrial inner membrane                                             | Function  |
| 428 | n290758 | transporter activity                                                     | 0.000118003 | Abcb8; Atp5h; Cox15; Cpt2; Etfdh; Gatm; Idh2; Micu1; Slc25a42; Slc25a5          | transporter activity                                                     | Component |
| 429 | n290758 | phospholipase activity                                                   | 0.000197915 | Aqp4; Fabp3; Grid2; Mup20; Slc17a9; Slc22a23; Slc25a5                           | phospholipase activity                                                   | Function  |
| 430 | n291764 | apical plasma membrane                                                   | 0.000406291 | Abhd15; Nceh1; Pla2g10                                                          | apical plasma membrane                                                   | Function  |
| 431 | n292619 | fatty acid beta-oxidation using acyl-CoA dehydrogenase                   | 0.000379583 | Gp2; Lrp2; P2ry1; Pdzk1; Rab17; Slc34a3; Slc39a4                                | fatty acid beta-oxidation using acyl-CoA dehydrogenase                   | Component |
| 432 | n292619 | recycling endosome membrane                                              | 0.000431597 | Acad11; Etfdh                                                                   | recycling endosome membrane                                              | Process   |
| 433 | n292619 | brush border membrane                                                    | 0.00046235  | Pigr; Rab17; Rap2c                                                              | brush border membrane                                                    | Component |
| 434 | n294011 | regulation of body fluid levels                                          | 0.000162761 | Folr1; Pdzk1; Shank2; Slc34a3                                                   | regulation of body fluid levels                                          | Process   |
| 435 | n294011 | brush border membrane                                                    | 0.000488155 | Apln; Aplnr                                                                     | brush border membrane                                                    | Component |
| 436 | n294791 | fatty acid beta-oxidation using acyl-CoA dehydrogenase                   | 0.000314733 | Folr1; Lrp2; Pdzk1; Shank2                                                      | fatty acid beta-oxidation using acyl-CoA dehydrogenase                   | Component |
| 437 | n295927 | semaphorin receptor activity                                             | 0.000104535 | Nrp2; Plxna4                                                                    | semaphorin receptor activity                                             | Process   |
| 438 | n295927 | brush border membrane                                                    | 0.000311448 | Folr1; Lrp2; Pdzk1; Shank2                                                      | brush border membrane                                                    | Function  |
| 439 | n296710 | fatty acid beta-oxidation using acyl-CoA dehydrogenase                   | 0.000341341 | Acad11; Etfdh                                                                   | fatty acid beta-oxidation using acyl-CoA dehydrogenase                   | Component |
| 440 | n297428 | brush border membrane                                                    | 0.000276487 | Acad11; Etfdh                                                                   | brush border membrane                                                    | Process   |

|     |         |                                                            |             |                                                                                                                         |                                                               |           |
|-----|---------|------------------------------------------------------------|-------------|-------------------------------------------------------------------------------------------------------------------------|---------------------------------------------------------------|-----------|
| 441 | n297428 | extracellular space                                        | 0.000315261 | Anxa13; Apln; Bpifa1;<br>Ctsz; Fabp3; Frzb; Kng2;<br>Lgals3bp; Npy; Pigr;<br>Pla2g7; Prtn3; S100b;<br>Wnt8a             | extracellular space                                           | Component |
| 442 | n343177 | PDZ domain<br>binding                                      | 0.000482151 | Grid2; Kirrel3; Lrp2;<br>Pdzk1; Ushbp1                                                                                  | PDZ domain<br>binding                                         | Function  |
| 443 | n343233 | extracellular space                                        | 0.000206719 | Angptl4; Ctsz; Cxcl1;<br>Dkk2; Frzb; Il1rn;<br>Lgals3bp; Lrg1; Npy;<br>Pla2g7; Selp; Spp1; Tg;<br>Timp1; Vcam1          | extracellular space                                           | Component |
| 444 | n343233 | amine metabolic<br>process                                 | 0.000320596 | Cyp1a1; Vcam1                                                                                                           | amine metabolic<br>process                                    | Process   |
| 445 | n343233 | IPAF<br>inflammasome<br>complex                            | 0.000320596 | Casp4; Naip2                                                                                                            | IPAF<br>inflammasome<br>complex                               | Component |
| 446 | n343233 | dipeptidyl-<br>peptidase activity                          | 0.000447463 | Dpep2; Dpp10                                                                                                            | dipeptidyl-<br>peptidase activity                             | Function  |
| 447 | n414277 | mitochondrial<br>inner membrane                            | 0.000281316 | Cox15; Cpt2; Etfhdh; Idh2;<br>Micu1; Slc25a1; Slc25a5                                                                   | mitochondrial<br>inner membrane                               | Component |
| 448 | n414277 | transcytosis                                               | 0.00046108  | Rab17; Tg                                                                                                               | transcytosis                                                  | Process   |
| 449 | n414371 | brush border<br>membrane                                   | 0.000350557 | Folr1; Lrp2; Pdzk1;<br>Shank2                                                                                           | brush border<br>membrane                                      | Component |
| 450 | n415160 | neutrophil<br>chemotaxis                                   | 0.000115476 | Cx3cl1; Cxcl1; Spp1                                                                                                     | neutrophil<br>chemotaxis                                      | Process   |
| 451 | n415160 | pyroptosis                                                 | 0.000159605 | Casp4; Naip2                                                                                                            | pyroptosis                                                    | Process   |
| 452 | n415160 | negative regulation<br>of interleukin-1<br>beta production | 0.000204887 | Acp5; Mefv                                                                                                              | negative<br>regulation of<br>interleukin-1 beta<br>production | Process   |
| 453 | n415160 | cell adhesion                                              | 0.000225519 | Cx3cl1; Lgals3bp; Nrp2;<br>Sdc3; Selp; Spp1; Vcam1                                                                      | cell adhesion                                                 | Process   |
| 454 | n415160 | extracellular<br>vesicular exosome                         | 0.000337096 | Chmp4c; Ctsz; Fgl1; Ftl1;<br>Il1rn; Lgals3bp; Lrg1;<br>Naip2; Rap2c; Rnf149;<br>Sirpb1a; Slc25a5; Spp1;<br>Timp1; Vcam1 | extracellular<br>vesicular exosome                            | Component |
| 455 | n415160 | negative regulation<br>of interleukin-12<br>production     | 0.000373876 | Acp5; Mefv                                                                                                              | negative<br>regulation of<br>interleukin-12<br>production     | Process   |
| 456 | n415160 | response to virus                                          | 0.000459386 | Bcl3; Dhx58; Ifi2712a                                                                                                   | response to virus                                             | Process   |
| 457 | n415206 | IPAF<br>inflammasome<br>complex                            | 0.000221109 | Casp4; Naip2                                                                                                            | IPAF<br>inflammasome<br>complex                               | Component |
| 458 | n415206 | pyroptosis                                                 | 0.000410654 | Casp4; Naip2                                                                                                            | pyroptosis                                                    | Process   |
| 459 | n415282 | receptor binding                                           | 0.000127303 | Apln; Galp; Gdf5; Kng2;<br>Pex14; S100b; Six3; Tg;<br>Wnt8a                                                             | receptor binding                                              | Function  |



|     |             |                                                        |             |                                                                                                                                                                                                                         |                                                        |           |
|-----|-------------|--------------------------------------------------------|-------------|-------------------------------------------------------------------------------------------------------------------------------------------------------------------------------------------------------------------------|--------------------------------------------------------|-----------|
| 460 | n415323     | transport                                              | 0.000115589 | Abcb8; Aqp4; Atp5h;<br>Chmp4c; Cpt2; Etfdh;<br>Fabp3; Grid2; Kcnk4;<br>Kcnq4; Mcoln3; Mup20;<br>Pdzk1; Pex14; Pitpnc1;<br>Rab17; Slc10a5; Slc25a42;<br>Slc25a5; Slc39a4; Trpm3                                          | transport                                              | Process   |
| 461 | n415323     | fatty acid beta-oxidation using acyl-CoA dehydrogenase | 0.000332126 | Acad11; Etfdh                                                                                                                                                                                                           | fatty acid beta-oxidation using acyl-CoA dehydrogenase | Process   |
| 462 | n415372     | brush border membrane                                  | 0.000281614 | Folr1; Lrp2; Pdzk1;<br>Shank2                                                                                                                                                                                           | brush border membrane                                  | Component |
| 463 | n415399     | external side of plasma membrane                       | 0.000127242 | Aqp4; Clec7a; Ly6g; Selp;<br>Slamf7; Vcam1                                                                                                                                                                              | external side of plasma membrane                       | Component |
| 464 | n415399     | IPAF inflammasome complex                              | 0.000128753 | Casp4; Naip2                                                                                                                                                                                                            | IPAF inflammasome complex                              | Component |
| 465 | n415399     | pyroptosis                                             | 0.000239418 | Casp4; Naip2                                                                                                                                                                                                            | pyroptosis                                             | Process   |
| 466 | n415399     | extracellular region                                   | 0.000304469 | Angptl4; Apoc1; Cma1;<br>Cpn2; Cx3cl1; Defb28;<br>Dkk2; Frzb; Galp; Il1rn;<br>Lgals3bp; Npy; Pla2g7;<br>Spp1                                                                                                            | extracellular region                                   | Component |
| 467 | n415399     | negative regulation of interleukin-1 beta production   | 0.000307233 | Acp5; Aqp4                                                                                                                                                                                                              | negative regulation of interleukin-1 beta production   | Process   |
| 468 | n416957     | apical plasma membrane                                 | 0.000329441 | Gp2; Lrp2; P2ry1; Pdzk1;<br>Podxl; Rab17; Slc39a4                                                                                                                                                                       | apical plasma membrane                                 | Component |
| 469 | n416957     | PDZ domain binding                                     | 0.000418354 | Grid2; Kirrel3; Lrp2;<br>Pdzk1; Ushbp1                                                                                                                                                                                  | PDZ domain binding                                     | Function  |
| 470 | n416957     | receptor activity                                      | 0.000478696 | Cd200r4; Folr1; Grid2;<br>Grik3; Lrp2; Plxna4                                                                                                                                                                           | receptor activity                                      | Function  |
| 471 | n418309     | apical plasma membrane                                 | 0.000395125 | Gp2; Lrp2; Pdzk1; Podxl;<br>Rab17; Shank2; Slc34a3;<br>Slc39a4                                                                                                                                                          | apical plasma membrane                                 | Component |
| 472 | n420390     | brush border membrane                                  | 0.000441707 | Folr1; Lrp2; Shank2;<br>Slc34a3                                                                                                                                                                                         | brush border membrane                                  | Component |
| 473 | NR_033641.2 | PDZ domain binding                                     | 0.0004494   | Grid2; Kirrel3; Lrp2;<br>Pdzk1; Ushbp1                                                                                                                                                                                  | PDZ domain binding                                     | Function  |
| 474 | NR_033764.1 | transport                                              | 0.000305466 | Abcb8; Abcg3; Apoc1;<br>Aqp4; Atp5h; Chmp4c;<br>Cpt2; Etfdh; Fabp3; Folr1;<br>Grid2; Grik3; Kcnk4;<br>Kcnq4; Mcoln3; Micu1;<br>Pdzk1; Pex14; Pitpnc1;<br>Rab17; Slc10a5; Slc17a9;<br>Slc25a5; Slc39a4; Slc6a7;<br>Trpm3 | transport                                              | Process   |
| 475 | NR_045776.1 | brush border membrane                                  | 0.000297843 | Folr1; Lrp2; Pdzk1;<br>Shank2                                                                                                                                                                                           | brush border membrane                                  | Component |
| 476 | NR_045899.1 | apical plasma membrane                                 | 0.000416275 | Gp2; Lrp2; P2ry1; Pdzk1;<br>Podxl; Rab17; Slc39a4                                                                                                                                                                       | apical plasma membrane                                 | Component |
| 477 | NR_045899.1 | PDZ domain binding                                     | 0.000499185 | Grid2; Kirrel3; Lrp2;<br>Pdzk1; Ushbp1                                                                                                                                                                                  | PDZ domain binding                                     | Function  |

|     |             |                                 |             |                                                                                                                                                                                                                  |                                 |           |
|-----|-------------|---------------------------------|-------------|------------------------------------------------------------------------------------------------------------------------------------------------------------------------------------------------------------------|---------------------------------|-----------|
| 478 | NR_073368.1 | transport                       | 0.000124861 | Abcb8; Abcg3; Apoc1; Aqp4; Atp5h; Chmp4c; Cpt2; Etfhdh; Fabp3; Fofl1; Grid2; Grik3; Kcnk4; Kcnq4; Mcoln3; Micu1; Pdzk1; Pex14; Pitpnc1; Rab17; Slc10a5; Slc17a9; Slc22a23; Slc25a5; Slc39a4; Slc6a7; Trpm3       | transport                       | Process   |
| 479 | NR_076393.1 | extracellular space             | 0.000199818 | Angptl4; Anxa13; Apln; Cx3cl1; Dkk2; Frzb; Il1rn; Lgals3bp; Npy; Pigr; Pla2g7; Prtn3; S100b; Selp; Spp1; Vcam1                                                                                                   | extracellular space             | Component |
| 480 | NR_076393.1 | inflammatory response           | 0.000220827 | Cd180; Clec7a; Mefv; Naip2; Pla2g7; Selp; Themis2                                                                                                                                                                | inflammatory response           | Process   |
| 481 | NR_076393.1 | IPAF inflammasome complex       | 0.000392792 | Casp4; Naip2                                                                                                                                                                                                     | IPAF inflammasome complex       | Component |
| 482 | NR_102339.1 | IPAF inflammasome complex       | 0.000255642 | Casp4; Naip2                                                                                                                                                                                                     | IPAF inflammasome complex       | Component |
| 483 | NR_102339.1 | regulation of body fluid levels | 0.000356925 | Apln; Aplnr                                                                                                                                                                                                      | regulation of body fluid levels | Process   |
| 484 | NR_102339.1 | inflammatory response           | 0.000450466 | Cd180; Clec7a; Mefv; Naip2; Selp; Themis2                                                                                                                                                                        | inflammatory response           | Process   |
| 485 | NR_102339.1 | pyroptosis                      | 0.000474605 | Casp4; Naip2                                                                                                                                                                                                     | pyroptosis                      | Process   |
| 486 | NR_102339.1 | immune system process           | 0.000479736 | Cd180; Cd300ld; Clec7a; Dhx58; Mefv; Naip2; Themis2                                                                                                                                                              | immune system process           | Process   |
| 487 | uc.31+      | apical plasma membrane          | 0.000245075 | Gp2; Lrp2; P2ry1; Pdzk1; Podxl; Rab17; Slc39a4                                                                                                                                                                   | apical plasma membrane          | Component |
| 488 | uc.31+      | PDZ domain binding              | 0.000334867 | Grid2; Kirrel3; Lrp2; Pdzk1; Ushbp1                                                                                                                                                                              | PDZ domain binding              | Function  |
| 489 | uc.31+      | receptor activity               | 0.000369777 | Cd200r4; Fofl1; Grid2; Grik3; Lrp2; Plxna4                                                                                                                                                                       | receptor activity               | Function  |
| 490 | uc.427+     | PDZ domain binding              | 0.000393459 | Frzb; Grid2; Kirrel3; Lrp2; Pdzk1; Ushbp1                                                                                                                                                                        | PDZ domain binding              | Function  |
| 491 | uc.83+      | regulation of body fluid levels | 0.000328987 | Apln; Aplnr                                                                                                                                                                                                      | regulation of body fluid levels | Process   |
| 492 | XR_104983.1 | receptor activity               | 0.000268312 | Cd200r4; Fofl1; Grid2; Grik3; Lrp2; Plxna4                                                                                                                                                                       | receptor activity               | Function  |
| 493 | XR_140871.1 | transport                       | 0.000103137 | Abcb8; Abcg3; Apoc1; Aqp4; Atp5h; Chmp4c; Cpt2; Etfhdh; Fabp3; Fofl1; Grid2; Grik3; Kcnk4; Kcnq4; Mcoln3; Micu1; Mup20; Pdzk1; Pex14; Pitpnc1; Rab17; Slc10a5; Slc17a9; Slc25a1; Slc25a5; Slc39a4; Slc6a7; Trpm3 | transport                       | Process   |
| 494 | XR_140871.1 | mitochondrial inner membrane    | 0.000235026 | Abcb8; Atp5h; Cox15; Cpt2; Etfhdh; Gatm; Idh2; Micu1; Slc25a1; Slc25a5                                                                                                                                           | mitochondrial inner membrane    | Component |

|     |             |                                                            |             |                                       |                                                              |          |
|-----|-------------|------------------------------------------------------------|-------------|---------------------------------------|--------------------------------------------------------------|----------|
| 495 | XR_141342.2 | transporter activity                                       | 0.000100669 | Aqp4; Fabp3; Grid2;<br>Mup20; Slc25a5 | transporter<br>activity                                      | Function |
| 496 | XR_141342.2 | negative regulation<br>of interleukin-1<br>beta production | 0.000234204 | Acp5; Aqp4                            | negatve<br>regulation of<br>interleukin-1 beta<br>production | Process  |
| 497 | XR_141342.2 | semaphorin<br>receptor activity                            | 0.000292268 | Nrp2; Plxna4                          | semaphorin<br>receptor activity                              | Function |
| 498 | XR_168932.1 | regulation of body<br>fluid levels                         | 0.000155401 | Apln; Aplnr                           | regulation of body<br>fluid levels                           | Process  |
| 499 | XR_168932.1 | negative regulation<br>of vasoconstriction                 | 0.000265456 | Apln; Cx3c11                          | negative<br>regulation of<br>vasoconstriction                | Process  |
| 500 | XR_168932.1 | negative regulation<br>of Wnt signaling<br>pathway         | 0.000335493 | Dkk2; Frzb; Six3                      | negative<br>regulation of Wnt<br>signaling pathway           | Process  |

---

**Table-S5 KEGG pathway analysis of top 500 lncRNA-correlated mRNAs**

| No | groups                       | enrichmentTerm                      | p.value     | enrichmentIDs              | pathway_desc                        |
|----|------------------------------|-------------------------------------|-------------|----------------------------|-------------------------------------|
| 1  | chr1_13410718_1_134181386_F  | Tryptophan metabolism               | 0.000287955 | Cyp1a1; Lao1; Tph1         | Tryptophan metabolism               |
| 2  | chr11_3341445_0_33450750_F   | Tryptophan metabolism               | 0.000424673 | Cyp1a1; Lao1; Tph1         | Tryptophan metabolism               |
| 3  | n415160                      | TNF signaling pathway               | 0.000826565 | Bcl3; Cx3cl1; Cxcl1; Vcam1 | TNF signaling pathway               |
| 4  | FR168758                     | Tryptophan metabolism               | 0.000889281 | Cyp1a1; Lao1; Tph1         | Tryptophan metabolism               |
| 5  | chr13_3487269_6_34906407_R   | Tryptophan metabolism               | 0.000889281 | Cyp1a1; Lao1; Tph1         | Tryptophan metabolism               |
| 6  | chr16_4472017_0_44723911_R   | Tryptophan metabolism               | 0.000889281 | Cyp1a1; Lao1; Tph1         | Tryptophan metabolism               |
| 7  | chr9_4260788_4261404_F       | Tryptophan metabolism               | 0.000889281 | Cyp1a1; Lao1; Tph1         | Tryptophan metabolism               |
| 8  | FR065159                     | Tryptophan metabolism               | 0.000889281 | Cyp1a1; Lao1; Tph1         | Tryptophan metabolism               |
| 9  | chr8_10815347_1_108159672_F  | Tryptophan metabolism               | 0.000974112 | Cyp1a1; Lao1; Tph1         | Tryptophan metabolism               |
| 10 | FR396644                     | Tryptophan metabolism               | 0.000974112 | Cyp1a1; Lao1; Tph1         | Tryptophan metabolism               |
| 11 | FR114000                     | Tryptophan metabolism               | 0.000974112 | Cyp1a1; Lao1; Tph1         | Tryptophan metabolism               |
| 12 | chr14_7372997_7_73751877_R   | Tryptophan metabolism               | 0.000974112 | Cyp1a1; Lao1; Tph1         | Tryptophan metabolism               |
| 13 | n343177                      | Tryptophan metabolism               | 0.001063907 | Cyp1a1; Lao1; Tph1         | Tryptophan metabolism               |
| 14 | FR134333                     | Tryptophan metabolism               | 0.001063907 | Cyp1a1; Lao1; Tph1         | Tryptophan metabolism               |
| 15 | XR_104983.1                  | Tryptophan metabolism               | 0.001063907 | Cyp1a1; Lao1; Tph1         | Tryptophan metabolism               |
| 16 | chr13_7464270_0_74701900_F   | Tryptophan metabolism               | 0.001158777 | Cyp1a1; Lao1; Tph1         | Tryptophan metabolism               |
| 17 | FR032503                     | Tryptophan metabolism               | 0.001158777 | Cyp1a1; Lao1; Tph1         | Tryptophan metabolism               |
| 18 | FR090859                     | Tryptophan metabolism               | 0.001158777 | Cyp1a1; Lao1; Tph1         | Tryptophan metabolism               |
| 19 | FR215148                     | Tryptophan metabolism               | 0.001158777 | Cyp1a1; Lao1; Tph1         | Tryptophan metabolism               |
| 20 | chr2_35828611_35838083_F     | Tryptophan metabolism               | 0.001158777 | Cyp1a1; Lao1; Tph1         | Tryptophan metabolism               |
| 21 | n415206                      | NOD-like receptor signaling pathway | 0.001179041 | Cxcl1; Mefv; Naip2         | NOD-like receptor signaling pathway |
| 22 | XR_141936.2                  | Tryptophan metabolism               | 0.001258828 | Cyp1a1; Lao1; Tph1         | Tryptophan metabolism               |
| 23 | n289317                      | Tryptophan metabolism               | 0.001258828 | Cyp1a1; Lao1; Tph1         | Tryptophan metabolism               |
| 24 | chr1_18314203_6_183163206_F  | Tryptophan metabolism               | 0.001258828 | Cyp1a1; Lao1; Tph1         | Tryptophan metabolism               |
| 25 | chr10_12057000_0_126407275_F | Tryptophan metabolism               | 0.001258828 | Cyp1a1; Lao1; Tph1         | Tryptophan metabolism               |
| 26 | FR289473                     | Tryptophan metabolism               | 0.001258828 | Cyp1a1; Lao1; Tph1         | Tryptophan metabolism               |
| 27 | FR366845                     | Tryptophan metabolism               | 0.001258828 | Cyp1a1; Lao1; Tph1         | Tryptophan metabolism               |
| 28 | FR052210                     | Tryptophan metabolism               | 0.001258828 | Cyp1a1; Lao1; Tph1         | Tryptophan metabolism               |
| 29 | FR279620                     | Tryptophan metabolism               | 0.001258828 | Cyp1a1; Lao1; Tph1         | Tryptophan metabolism               |
| 30 | FR149067                     | Tryptophan metabolism               | 0.001258828 | Cyp1a1; Lao1; Tph1         | Tryptophan metabolism               |
| 31 | chr15_7840337_7_78412545_F   | Tryptophan metabolism               | 0.001258828 | Cyp1a1; Lao1; Tph1         | Tryptophan metabolism               |
| 32 | n416957                      | Tryptophan metabolism               | 0.001364168 | Cyp1a1; Lao1; Tph1         | Tryptophan metabolism               |
| 33 | chr18_7040008_2_70404236_R   | Tryptophan metabolism               | 0.001364168 | Cyp1a1; Lao1; Tph1         | Tryptophan metabolism               |
| 34 | ENSMUST00000139056           | Tryptophan metabolism               | 0.001364168 | Cyp1a1; Lao1; Tph1         | Tryptophan metabolism               |

|    |                               |                                     |             |                      |                                     |
|----|-------------------------------|-------------------------------------|-------------|----------------------|-------------------------------------|
| 35 | NR_033641.2                   | Tryptophan metabolism               | 0.001364168 | Cyp1a1; Lao1; Tph1   | Tryptophan metabolism               |
| 36 | FR186619                      | Tryptophan metabolism               | 0.001364168 | Cyp1a1; Lao1; Tph1   | Tryptophan metabolism               |
| 37 | FR202182                      | Tryptophan metabolism               | 0.001364168 | Cyp1a1; Lao1; Tph1   | Tryptophan metabolism               |
| 38 | n415160                       | NOD-like receptor signaling pathway | 0.001445613 | Cxcl1; Mefv; Naip2   | NOD-like receptor signaling pathway |
| 39 | FR115704                      | Tryptophan metabolism               | 0.001474899 | Cyp1a1; Lao1; Tph1   | Tryptophan metabolism               |
| 40 | NR_045776.1                   | Tryptophan metabolism               | 0.001474899 | Cyp1a1; Lao1; Tph1   | Tryptophan metabolism               |
| 41 | FR268824                      | Tryptophan metabolism               | 0.001474899 | Cyp1a1; Lao1; Tph1   | Tryptophan metabolism               |
| 42 | FR100940                      | Tryptophan metabolism               | 0.001474899 | Cyp1a1; Lao1; Tph1   | Tryptophan metabolism               |
| 43 | FR301809                      | Tryptophan metabolism               | 0.001474899 | Cyp1a1; Lao1; Tph1   | Tryptophan metabolism               |
| 44 | FR003993                      | Tryptophan metabolism               | 0.001474899 | Cyp1a1; Lao1; Tph1   | Tryptophan metabolism               |
| 45 | FR168142                      | Tryptophan metabolism               | 0.001474899 | Cyp1a1; Lao1; Tph1   | Tryptophan metabolism               |
| 46 | FR066795<br>chr12_1078220     | Tryptophan metabolism               | 0.001474899 | Cyp1a1; Lao1; Tph1   | Tryptophan metabolism               |
| 47 | 42_107823753_                 | Tryptophan metabolism               | 0.001474899 | Cyp1a1; Lao1; Tph1   | Tryptophan metabolism               |
| 48 | chr12_5527169<br>1_55276492_R | Tryptophan metabolism               | 0.001474899 | Cyp1a1; Lao1; Tph1   | Tryptophan metabolism               |
| 49 | FR382845                      | PPAR signaling pathway              | 0.001571141 | Angptl4; Cpt2; Fabp3 | PPAR signaling pathway              |
| 50 | ENSMUST000<br>00134627        | Tryptophan metabolism               | 0.001591123 | Cyp1a1; Lao1; Tph1   | Tryptophan metabolism               |
| 51 | n263685                       | Tryptophan metabolism               | 0.001591123 | Cyp1a1; Lao1; Tph1   | Tryptophan metabolism               |
| 52 | NR_045899.1                   | Tryptophan metabolism               | 0.001591123 | Cyp1a1; Lao1; Tph1   | Tryptophan metabolism               |
| 53 | FR099681                      | Tryptophan metabolism               | 0.001591123 | Cyp1a1; Lao1; Tph1   | Tryptophan metabolism               |
| 54 | FR097477                      | Tryptophan metabolism               | 0.001591123 | Cyp1a1; Lao1; Tph1   | Tryptophan metabolism               |
| 55 | FR074898<br>chr1_134372943    | Tryptophan metabolism               | 0.001591123 | Cyp1a1; Lao1; Tph1   | Tryptophan metabolism               |
| 56 | 2_134372943_                  | Tryptophan metabolism               | 0.001591123 | Cyp1a1; Lao1; Tph1   | Tryptophan metabolism               |
| 57 | FR374009                      | Tryptophan metabolism               | 0.001591123 | Cyp1a1; Lao1; Tph1   | Tryptophan metabolism               |
| 58 | chr1_75075500<br>_75102200_R  | Tryptophan metabolism               | 0.001591123 | Cyp1a1; Lao1; Tph1   | Tryptophan metabolism               |
| 59 | FR150621                      | Tryptophan metabolism               | 0.001591123 | Cyp1a1; Lao1; Tph1   | Tryptophan metabolism               |
| 60 | FR042390                      | Tryptophan metabolism               | 0.001712938 | Cyp1a1; Lao1; Tph1   | Tryptophan metabolism               |
| 61 | FR155040                      | Tryptophan metabolism               | 0.001712938 | Cyp1a1; Lao1; Tph1   | Tryptophan metabolism               |
| 62 | FR285140                      | Tryptophan metabolism               | 0.001712938 | Cyp1a1; Lao1; Tph1   | Tryptophan metabolism               |
| 63 | chr15_9659733<br>0_96663683_F | Tryptophan metabolism               | 0.001712938 | Cyp1a1; Lao1; Tph1   | Tryptophan metabolism               |
| 64 | FR254927                      | Tryptophan metabolism               | 0.001712938 | Cyp1a1; Lao1; Tph1   | Tryptophan metabolism               |
| 65 | chr12_1687341<br>0_16873872_F | Tryptophan metabolism               | 0.001712938 | Cyp1a1; Lao1; Tph1   | Tryptophan metabolism               |
| 66 | FR171433                      | Tryptophan metabolism               | 0.001712938 | Cyp1a1; Lao1; Tph1   | Tryptophan metabolism               |
| 67 | FR117744                      | Tryptophan metabolism               | 0.001712938 | Cyp1a1; Lao1; Tph1   | Tryptophan metabolism               |
| 68 | chr7_91558475<br>_91733625_R  | Tryptophan metabolism               | 0.001712938 | Cyp1a1; Lao1; Tph1   | Tryptophan metabolism               |
| 69 | FR120704                      | Tryptophan metabolism               | 0.001712938 | Cyp1a1; Lao1; Tph1   | Tryptophan metabolism               |
| 70 | n415282                       | Tryptophan metabolism               | 0.001712938 | Cyp1a1; Lao1; Tph1   | Tryptophan metabolism               |
| 71 | FR090778                      | NOD-like receptor signaling pathway | 0.001747235 | Cxcl1; Mefv; Naip2   | NOD-like receptor signaling pathway |
| 72 | FR162485                      | Tryptophan metabolism               | 0.001840441 | Cyp1a1; Lao1; Tph1   | Tryptophan metabolism               |
| 73 | chr13_9828115<br>8_98285757_F | Tryptophan metabolism               | 0.001840441 | Cyp1a1; Lao1; Tph1   | Tryptophan metabolism               |
| 74 | FR078628                      | Tryptophan metabolism               | 0.001840441 | Cyp1a1; Lao1; Tph1   | Tryptophan metabolism               |
| 75 | FR054476                      | Tryptophan metabolism               | 0.001840441 | Cyp1a1; Lao1; Tph1   | Tryptophan metabolism               |
| 76 | FR019981                      | Tryptophan metabolism               | 0.001840441 | Cyp1a1; Lao1; Tph1   | Tryptophan metabolism               |

|     |                                            |                                     |             |                                |                                     |
|-----|--------------------------------------------|-------------------------------------|-------------|--------------------------------|-------------------------------------|
| 77  | FR385633                                   | Tryptophan metabolism               | 0.001840441 | Cyp1a1; Lao1; Tph1             | Tryptophan metabolism               |
| 78  | FR139436                                   | Tryptophan metabolism               | 0.001840441 | Cyp1a1; Lao1; Tph1             | Tryptophan metabolism               |
| 79  | FR233225                                   | Tryptophan metabolism               | 0.001840441 | Cyp1a1; Lao1; Tph1             | Tryptophan metabolism               |
| 80  | n280804                                    | Tryptophan metabolism               | 0.001840441 | Cyp1a1; Lao1; Tph1             | Tryptophan metabolism               |
| 81  | FR286933                                   | Tryptophan metabolism               | 0.001840441 | Cyp1a1; Lao1; Tph1             | Tryptophan metabolism               |
| 82  | FR396644                                   | NOD-like receptor signaling pathway | 0.001911686 | Cxcl1; Mefv; Naip2             | NOD-like receptor signaling pathway |
| 83  | FR007873                                   | Tryptophan metabolism               | 0.001973726 | Cyp1a1; Lao1; Tph1             | Tryptophan metabolism               |
| 84  | chr3_86827945_86886695_R                   | Tryptophan metabolism               | 0.001973726 | Cyp1a1; Lao1; Tph1             | Tryptophan metabolism               |
| 85  | chr17_29374758_29387733_R                  | Tryptophan metabolism               | 0.001973726 | Cyp1a1; Lao1; Tph1             | Tryptophan metabolism               |
| 86  | n265955                                    | Tryptophan metabolism               | 0.001973726 | Cyp1a1; Lao1; Tph1             | Tryptophan metabolism               |
| 87  | FR117799                                   | Tryptophan metabolism               | 0.001973726 | Cyp1a1; Lao1; Tph1             | Tryptophan metabolism               |
| 88  | n265736                                    | Tryptophan metabolism               | 0.001973726 | Cyp1a1; Lao1; Tph1             | Tryptophan metabolism               |
| 89  | FR046015                                   | Thyroid hormone synthesis           | 0.001979627 | Lrp2; Tg; Tshr                 | Thyroid hormone synthesis           |
| 90  | FR028133                                   | Thyroid hormone synthesis           | 0.001979627 | Lrp2; Tg; Tshr                 | Thyroid hormone synthesis           |
| 91  | n292619                                    | Cell adhesion molecules (CAMs)      | 0.002098733 | Icos; Nrnx2; Sdc3; Selp; Vcam1 | Cell adhesion molecules (CAMs)      |
| 92  | FR302003                                   | Tryptophan metabolism               | 0.002112886 | Cyp1a1; Lao1; Tph1             | Tryptophan metabolism               |
| 93  | FR249432                                   | Tryptophan metabolism               | 0.002112886 | Cyp1a1; Lao1; Tph1             | Tryptophan metabolism               |
| 94  | Gomafu                                     | Tryptophan metabolism               | 0.002112886 | Cyp1a1; Lao1; Tph1             | Tryptophan metabolism               |
| 95  | FR301533                                   | Tryptophan metabolism               | 0.002112886 | Cyp1a1; Lao1; Tph1             | Tryptophan metabolism               |
| 96  | ENSMUST00000132130                         | Tryptophan metabolism               | 0.002112886 | Cyp1a1; Lao1; Tph1             | Tryptophan metabolism               |
| 97  | FR298560                                   | Tryptophan metabolism               | 0.002112886 | Cyp1a1; Lao1; Tph1             | Tryptophan metabolism               |
| 98  | chr2_157838320_157853495_F                 | Tryptophan metabolism               | 0.002112886 | Cyp1a1; Lao1; Tph1             | Tryptophan metabolism               |
| 99  | FR266999                                   | Tryptophan metabolism               | 0.002112886 | Cyp1a1; Lao1; Tph1             | Tryptophan metabolism               |
| 100 | FR326589                                   | Tryptophan metabolism               | 0.002112886 | Cyp1a1; Lao1; Tph1             | Tryptophan metabolism               |
| 101 | FR199374                                   | Tryptophan metabolism               | 0.002112886 | Cyp1a1; Lao1; Tph1             | Tryptophan metabolism               |
| 102 | chr3_35782698_35789932_R                   | Tryptophan metabolism               | 0.002112886 | Cyp1a1; Lao1; Tph1             | Tryptophan metabolism               |
| 103 | FR337786<br>GIII12_1100032                 | Tryptophan metabolism               | 0.002112886 | Cyp1a1; Lao1; Tph1             | Tryptophan metabolism               |
| 104 | 68_110030953_r                             | Tryptophan metabolism               | 0.002258011 | Cyp1a1; Lao1; Tph1             | Tryptophan metabolism               |
| 105 | FR019091                                   | Tryptophan metabolism               | 0.002258011 | Cyp1a1; Lao1; Tph1             | Tryptophan metabolism               |
| 106 | chr19_23068397_23190256_R                  | Tryptophan metabolism               | 0.002258011 | Cyp1a1; Lao1; Tph1             | Tryptophan metabolism               |
| 107 | chr11_6796679_6797670_F                    | Tryptophan metabolism               | 0.002258011 | Cyp1a1; Lao1; Tph1             | Tryptophan metabolism               |
| 108 | chr5_31883451_31884082_F                   | Tryptophan metabolism               | 0.002258011 | Cyp1a1; Lao1; Tph1             | Tryptophan metabolism               |
| 109 | n273521                                    | Tryptophan metabolism               | 0.002258011 | Cyp1a1; Lao1; Tph1             | Tryptophan metabolism               |
| 110 | chrX_18734106_18744367_R<br>GIII1_13047331 | Tryptophan metabolism               | 0.002258011 | Cyp1a1; Lao1; Tph1             | Tryptophan metabolism               |
| 111 | 4_138476054_p                              | Tryptophan metabolism               | 0.002258011 | Cyp1a1; Lao1; Tph1             | Tryptophan metabolism               |
| 112 | n296710                                    | Tryptophan metabolism               | 0.002258011 | Cyp1a1; Lao1; Tph1             | Tryptophan metabolism               |
| 113 | chr13_66381200_66410200_F                  | Tryptophan metabolism               | 0.002258011 | Cyp1a1; Lao1; Tph1             | Tryptophan metabolism               |

|     |                                |                                        |             |                                                                                                          |                                        |
|-----|--------------------------------|----------------------------------------|-------------|----------------------------------------------------------------------------------------------------------|----------------------------------------|
| 114 | FR185165                       | Tryptophan metabolism                  | 0.002258011 | Cyp1a1; Lao1; Tph1                                                                                       | Tryptophan metabolism                  |
| 115 | chr15_3216751<br>6_32174417_R  | Tryptophan metabolism                  | 0.002258011 | Cyp1a1; Lao1; Tph1                                                                                       | Tryptophan metabolism                  |
| 116 | chr1_16296500<br>1_162966376_F | Tryptophan metabolism                  | 0.002258011 | Cyp1a1; Lao1; Tph1                                                                                       | Tryptophan metabolism                  |
| 117 | FR389545                       | Tryptophan metabolism                  | 0.002258011 | Cyp1a1; Lao1; Tph1                                                                                       | Tryptophan metabolism                  |
| 118 | FR375498                       | Tryptophan metabolism                  | 0.002409188 | Cyp1a1; Lao1; Tph1                                                                                       | Tryptophan metabolism                  |
| 119 | FR358023                       | Tryptophan metabolism                  | 0.002409188 | Cyp1a1; Lao1; Tph1                                                                                       | Tryptophan metabolism                  |
| 120 | chr4_88745771<br>_88776323_F   | Tryptophan metabolism                  | 0.002409188 | Cyp1a1; Lao1; Tph1                                                                                       | Tryptophan metabolism                  |
| 121 | FR215734                       | Tryptophan metabolism                  | 0.002409188 | Cyp1a1; Lao1; Tph1                                                                                       | Tryptophan metabolism                  |
| 122 | chr8_119715254<br>8_119749198_ | Tryptophan metabolism                  | 0.002409188 | Cyp1a1; Lao1; Tph1                                                                                       | Tryptophan metabolism                  |
| 123 | FR391590                       | Tryptophan metabolism                  | 0.002409188 | Cyp1a1; Lao1; Tph1                                                                                       | Tryptophan metabolism                  |
| 124 | n414371                        | Tryptophan metabolism                  | 0.002409188 | Cyp1a1; Lao1; Tph1                                                                                       | Tryptophan metabolism                  |
| 125 | FR057053                       | Tryptophan metabolism                  | 0.002409188 | Cyp1a1; Lao1; Tph1                                                                                       | Tryptophan metabolism                  |
| 126 | chr10_8606683<br>_8665783_R    | Tryptophan metabolism                  | 0.002409188 | Cyp1a1; Lao1; Tph1                                                                                       | Tryptophan metabolism                  |
| 127 | FR136228                       | Tryptophan metabolism                  | 0.002409188 | Cyp1a1; Lao1; Tph1                                                                                       | Tryptophan metabolism                  |
| 128 | FR347914                       | Tryptophan metabolism                  | 0.002409188 | Cyp1a1; Lao1; Tph1                                                                                       | Tryptophan metabolism                  |
| 129 | ENSMUST000<br>00149707         | NOD-like receptor<br>signaling pathway | 0.002461855 | Cxcl1; Mefv; Naip2                                                                                       | NOD-like receptor<br>signaling pathway |
| 130 | ENSMUST000<br>00150216         | Tryptophan metabolism                  | 0.002566503 | Cyp1a1; Lao1; Tph1                                                                                       | Tryptophan metabolism                  |
| 131 | chr1_19044555<br>4_196445818_  | Tryptophan metabolism                  | 0.002566503 | Cyp1a1; Lao1; Tph1                                                                                       | Tryptophan metabolism                  |
| 132 | FR028809                       | Tryptophan metabolism                  | 0.002566503 | Cyp1a1; Lao1; Tph1                                                                                       | Tryptophan metabolism                  |
| 133 | chr12_8951967<br>5_89533975_F  | Tryptophan metabolism                  | 0.002566503 | Cyp1a1; Lao1; Tph1                                                                                       | Tryptophan metabolism                  |
| 134 | ENSMUST000<br>00181563         | Tryptophan metabolism                  | 0.002566503 | Cyp1a1; Lao1; Tph1                                                                                       | Tryptophan metabolism                  |
| 135 | FR087516                       | Tryptophan metabolism                  | 0.002566503 | Cyp1a1; Lao1; Tph1                                                                                       | Tryptophan metabolism                  |
| 136 | FR087735                       | Tryptophan metabolism                  | 0.002566503 | Cyp1a1; Lao1; Tph1                                                                                       | Tryptophan metabolism                  |
| 137 | chr1_15857010<br>7_138632310_  | Tryptophan metabolism                  | 0.002566503 | Cyp1a1; Lao1; Tph1                                                                                       | Tryptophan metabolism                  |
| 138 | XR_140433.1                    | Tryptophan metabolism                  | 0.002566503 | Cyp1a1; Lao1; Tph1                                                                                       | Tryptophan metabolism                  |
| 139 | FR177295                       | Tryptophan metabolism                  | 0.002566503 | Cyp1a1; Lao1; Tph1                                                                                       | Tryptophan metabolism                  |
| 140 | n290305                        | Tryptophan metabolism                  | 0.002566503 | Cyp1a1; Lao1; Tph1                                                                                       | Tryptophan metabolism                  |
| 141 | chr6_37630192<br>_37682692_R   | Tryptophan metabolism                  | 0.002566503 | Cyp1a1; Lao1; Tph1                                                                                       | Tryptophan metabolism                  |
| 142 | n289590                        | PPAR signaling pathway                 | 0.002572143 | Angptl4; Cpt2; Fabp3<br>Atp5n; Cox1c;<br>Cyp1a1; Fut2; Gatm;                                             | PPAR signaling pathway                 |
| 143 | FR326589                       | Metabolic pathways                     | 0.002601753 | Ggt1; Idh2; Impdh1;<br>Lao1; Lipf; Nme4;<br>Phgdh; Pigx; Pla2g10;<br>Tph1; Cox1c;<br>Cyp1a1; Fut2; Gatm; | Metabolic pathways                     |
| 144 | FR298560                       | Metabolic pathways                     | 0.002601753 | Ggt1; Idh2; Impdh1;<br>Lao1; Lipf; Nme4;<br>Phgdh; Pigx; Pla2g10;<br>Tph1                                | Metabolic pathways                     |

|     |                             |                                |             |                                                                                                  |                                |
|-----|-----------------------------|--------------------------------|-------------|--------------------------------------------------------------------------------------------------|--------------------------------|
| 145 | FR090859                    | Metabolic pathways             | 0.002625848 | Atp5h; Cox15;<br>Cyp1a1; Fut2; Gatm;<br>Ggt1; Idh2; Lao1; Lipf; Nme4; Pigx; Pla2g10;             | Metabolic pathways             |
| 146 | FR374009                    | Metabolic pathways             | 0.002639623 | Atp5h; Cox15;<br>Cyp1a1; Fut2; Gatm;<br>Ggt1; Idh2; Lao1; Lipf; Nme4; Phgdh; Pigx; Pla2g10; Tph1 | Metabolic pathways             |
| 147 | FR097477                    | Metabolic pathways             | 0.002639623 | Atp5h; Cox15;<br>Cyp1a1; Fut2; Gatm;<br>Ggt1; Idh2; Lao1; Lipf; Nme4; Phgdh; Pigx; Pla2g10; Tph1 | Metabolic pathways             |
| 148 | n283487                     | Renin-angiotensin system       | 0.002695293 | Cma1; Nln                                                                                        | Renin-angiotensin system       |
| 149 | chr7_82902248_82955248_F    | Tryptophan metabolism          | 0.00273004  | Cyp1a1; Lao1; Tph1                                                                               | Tryptophan metabolism          |
| 150 | n412060                     | Tryptophan metabolism          | 0.00273004  | Cyp1a1; Lao1; Tph1                                                                               | Tryptophan metabolism          |
| 151 | FR101946                    | Tryptophan metabolism          | 0.00273004  | Cyp1a1; Lao1; Tph1                                                                               | Tryptophan metabolism          |
| 152 | chr3_21964899_21974885_F    | Tryptophan metabolism          | 0.00273004  | Cyp1a1; Lao1; Tph1                                                                               | Tryptophan metabolism          |
| 153 | FR125080                    | Tryptophan metabolism          | 0.00273004  | Cyp1a1; Lao1; Tph1                                                                               | Tryptophan metabolism          |
| 154 | chr18_6743507_5_67447150_F  | Tryptophan metabolism          | 0.00273004  | Cyp1a1; Lao1; Tph1                                                                               | Tryptophan metabolism          |
| 155 | FR325017                    | Tryptophan metabolism          | 0.00273004  | Cyp1a1; Lao1; Tph1                                                                               | Tryptophan metabolism          |
| 156 | ENSMUST00000163396          | Tryptophan metabolism          | 0.00273004  | Cyp1a1; Lao1; Tph1                                                                               | Tryptophan metabolism          |
| 157 | chr9_67414463_67483185_R    | Tryptophan metabolism          | 0.00273004  | Cyp1a1; Lao1; Tph1                                                                               | Tryptophan metabolism          |
| 158 | n296070                     | Tryptophan metabolism          | 0.00273004  | Cyp1a1; Lao1; Tph1                                                                               | Tryptophan metabolism          |
| 159 | n413982                     | Tryptophan metabolism          | 0.00273004  | Cyp1a1; Lao1; Tph1                                                                               | Tryptophan metabolism          |
| 160 | FR238565                    | Tryptophan metabolism          | 0.00273004  | Cyp1a1; Lao1; Tph1                                                                               | Tryptophan metabolism          |
| 161 | chr4_12357209_0_123581365_F | TNF signaling pathway          | 0.002747311 | Bcl3; Cx3cl1; Vcam1                                                                              | TNF signaling pathway          |
| 162 | FR398266                    | Cell adhesion molecules (CAMs) | 0.0028949   | Nrxn2; Sdc3; Selp; Vcam1                                                                         | Cell adhesion molecules (CAMs) |
| 163 | FR100205                    | Cell adhesion molecules (CAMs) | 0.0028949   | Nrxn2; Sdc3; Selp; Vcam1                                                                         | Cell adhesion molecules (CAMs) |
| 164 | chr18_5813291_5813708_R     | Tryptophan metabolism          | 0.002899882 | Cyp1a1; Lao1; Tph1                                                                               | Tryptophan metabolism          |
| 165 | chr8_26345571_26346095_R    | Tryptophan metabolism          | 0.002899882 | Cyp1a1; Lao1; Tph1                                                                               | Tryptophan metabolism          |
| 166 | chr9_14480441_14483362_F    | Tryptophan metabolism          | 0.002899882 | Cyp1a1; Lao1; Tph1                                                                               | Tryptophan metabolism          |
| 167 | chr2_15199280_6_152025456_F | Tryptophan metabolism          | 0.002899882 | Cyp1a1; Lao1; Tph1                                                                               | Tryptophan metabolism          |
| 168 | n263541                     | Tryptophan metabolism          | 0.002899882 | Cyp1a1; Lao1; Tph1                                                                               | Tryptophan metabolism          |
| 169 | chr10_1803649_0_18059965_F  | Tryptophan metabolism          | 0.002899882 | Cyp1a1; Lao1; Tph1                                                                               | Tryptophan metabolism          |
| 170 | chr13_9851386_8_98517366_R  | Tryptophan metabolism          | 0.002899882 | Cyp1a1; Lao1; Tph1                                                                               | Tryptophan metabolism          |



|     |                                               |                              |             |                               |                              |
|-----|-----------------------------------------------|------------------------------|-------------|-------------------------------|------------------------------|
| 171 | chr3_40439525<br>_40509975_R<br>Chr12_1112011 | Tryptophan metabolism        | 0.002899882 | Cyp1a1; Lao1; Tph1            | Tryptophan metabolism        |
| 172 | 72_111333890_<br>r                            | Tryptophan metabolism        | 0.002899882 | Cyp1a1; Lao1; Tph1            | Tryptophan metabolism        |
| 173 | n419646                                       | Tryptophan metabolism        | 0.002899882 | Cyp1a1; Lao1; Tph1            | Tryptophan metabolism        |
| 174 | chr1_69531191<br>_69570566_F                  | Thyroid hormone<br>synthesis | 0.002961545 | Lrp2; Tg; Tshr                | Thyroid hormone<br>synthesis |
| 175 | FR237950                                      | Tryptophan metabolism        | 0.003076106 | Cyp1a1; Lao1; Tph1            | Tryptophan metabolism        |
| 176 | chr7_80762708<br>_80763274_R                  | Tryptophan metabolism        | 0.003076106 | Cyp1a1; Lao1; Tph1            | Tryptophan metabolism        |
| 177 | XR_141927.1                                   | Tryptophan metabolism        | 0.003076106 | Cyp1a1; Lao1; Tph1            | Tryptophan metabolism        |
| 178 | uc.411+                                       | Tryptophan metabolism        | 0.003076106 | Cyp1a1; Lao1; Tph1            | Tryptophan metabolism        |
| 179 | chr15_3820515<br>4_38206196_F                 | Tryptophan metabolism        | 0.003076106 | Cyp1a1; Lao1; Tph1            | Tryptophan metabolism        |
| 180 | FR395103                                      | Tryptophan metabolism        | 0.003076106 | Cyp1a1; Lao1; Tph1            | Tryptophan metabolism        |
| 181 | chr4_11679037<br>3_116797823_F                | Tryptophan metabolism        | 0.003076106 | Cyp1a1; Lao1; Tph1            | Tryptophan metabolism        |
| 182 | ENSMUST000<br>00157205                        | Tryptophan metabolism        | 0.003076106 | Cyp1a1; Lao1; Tph1            | Tryptophan metabolism        |
| 183 | FR061730                                      | Tryptophan metabolism        | 0.003076106 | Cyp1a1; Lao1; Tph1            | Tryptophan metabolism        |
| 184 | chr8_48476637<br>_48492537_F                  | Tryptophan metabolism        | 0.003076106 | Cyp1a1; Lao1; Tph1            | Tryptophan metabolism        |
| 185 | chr8_96983590<br>_96994419_F                  | TNF signaling pathway        | 0.003226253 | Bcl3; Cx3cl1; Cxcl1;<br>Vcam1 | TNF signaling pathway        |
| 186 | NR_033764.1                                   | Tryptophan metabolism        | 0.003258792 | Cyp1a1; Lao1; Tph1            | Tryptophan metabolism        |
| 187 | FR283931                                      | Tryptophan metabolism        | 0.003258792 | Cyp1a1; Lao1; Tph1            | Tryptophan metabolism        |
| 188 | chr9_12184592<br>0_121858120_F                | Tryptophan metabolism        | 0.003258792 | Cyp1a1; Lao1; Tph1            | Tryptophan metabolism        |
| 189 | FR065962                                      | Tryptophan metabolism        | 0.003258792 | Cyp1a1; Lao1; Tph1            | Tryptophan metabolism        |
| 190 | FR187810                                      | Tryptophan metabolism        | 0.003258792 | Cyp1a1; Lao1; Tph1            | Tryptophan metabolism        |
| 191 | chr9_56646768<br>_56649068_R<br>Chr12_1007063 | Tryptophan metabolism        | 0.003258792 | Cyp1a1; Lao1; Tph1            | Tryptophan metabolism        |
| 192 | 23_100908645_<br>r                            | Tryptophan metabolism        | 0.003258792 | Cyp1a1; Lao1; Tph1            | Tryptophan metabolism        |
| 193 | FR312820                                      | Tryptophan metabolism        | 0.003258792 | Cyp1a1; Lao1; Tph1            | Tryptophan metabolism        |
| 194 | chr13_1594752<br>1_15999246_R                 | Tryptophan metabolism        | 0.003258792 | Cyp1a1; Lao1; Tph1            | Tryptophan metabolism        |
| 195 | FR017535                                      | Tryptophan metabolism        | 0.003258792 | Cyp1a1; Lao1; Tph1            | Tryptophan metabolism        |
| 196 | FR030947                                      | Tryptophan metabolism        | 0.003258792 | Cyp1a1; Lao1; Tph1            | Tryptophan metabolism        |
| 197 | n272641                                       | Tryptophan metabolism        | 0.003258792 | Cyp1a1; Lao1; Tph1            | Tryptophan metabolism        |
| 198 | chr14_5531719<br>9_55317670_R                 | Tryptophan metabolism        | 0.003448015 | Cyp1a1; Lao1; Tph1            | Tryptophan metabolism        |
| 199 | chr9_58301467<br>_58323783_F                  | Tryptophan metabolism        | 0.003448015 | Cyp1a1; Lao1; Tph1            | Tryptophan metabolism        |
| 200 | chr2_72818943<br>_72826893_R                  | Tryptophan metabolism        | 0.003448015 | Cyp1a1; Lao1; Tph1            | Tryptophan metabolism        |
| 201 | FR382833                                      | Tryptophan metabolism        | 0.003448015 | Cyp1a1; Lao1; Tph1            | Tryptophan metabolism        |
| 202 | FR279378                                      | Tryptophan metabolism        | 0.003448015 | Cyp1a1; Lao1; Tph1            | Tryptophan metabolism        |
| 203 | n290758<br>Chr1_13340210                      | Tryptophan metabolism        | 0.003448015 | Cyp1a1; Lao1; Tph1            | Tryptophan metabolism        |
| 204 | 6_133415516_<br>Chr11_1200721                 | Tryptophan metabolism        | 0.003448015 | Cyp1a1; Lao1; Tph1            | Tryptophan metabolism        |
| 205 | 99_120130099_<br>p                            | Tryptophan metabolism        | 0.003448015 | Cyp1a1; Lao1; Tph1            | Tryptophan metabolism        |

|     |                                    |                              |             |                                                                                                        |                              |
|-----|------------------------------------|------------------------------|-------------|--------------------------------------------------------------------------------------------------------|------------------------------|
| 206 | chr14_3392394<br>4_34003394_F      | Tryptophan metabolism        | 0.003448015 | Cyp1a1; Lao1; Tph1                                                                                     | Tryptophan metabolism        |
| 207 | chr10_3966671<br>9_39679959_R      | Tryptophan metabolism        | 0.003448015 | Cyp1a1; Lao1; Tph1                                                                                     | Tryptophan metabolism        |
| 208 | chr7_26212709<br>_26230775_F       | Tryptophan metabolism        | 0.003448015 | Cyp1a1; Lao1; Tph1                                                                                     | Tryptophan metabolism        |
| 209 | FR016598                           | Tryptophan metabolism        | 0.003448015 | Cyp1a1; Lao1; Tph1                                                                                     | Tryptophan metabolism        |
| 210 | n418283                            | Tryptophan metabolism        | 0.003448015 | Cyp1a1; Lao1; Tph1                                                                                     | Tryptophan metabolism        |
| 211 | FR171433                           | Metabolic pathways           | 0.003455252 | Atp5h; Cox15;<br>Cyp1a1; Fut2; Gatm;<br>Ggt1; Idh2; Lao1; Lipf;<br>Nme4; Phgdh; Pigx;<br>Pla2g10; Tph1 | Metabolic pathways           |
| 212 | chr12_1687341<br>0_16873872_F      | Metabolic pathways           | 0.003455252 | Atp5h; Cox15;<br>Cyp1a1; Fut2; Gatm;<br>Ggt1; Idh2; Lao1; Lipf;<br>Nme4; Phgdh; Pigx;<br>Pla2g10; Tph1 | Metabolic pathways           |
| 213 | chr15_9659733<br>0_96663683_F      | Metabolic pathways           | 0.003455252 | Atp5h; Cox15;<br>Cyp1a1; Fut2; Gatm;<br>Ggt1; Idh2; Lao1; Lipf;<br>Nme4; Phgdh; Pigx;<br>Pla2g10; Tph1 | Metabolic pathways           |
| 214 | FR052210                           | Metabolic pathways           | 0.00349966  | Atp5h; Cox15;<br>Ggt1; Idh2; Lao1; Lipf;<br>Nme4; Pigx; Pla2g10;                                       | Metabolic pathways           |
| 215 | chr1_18314265<br>6_183163206_<br>R | Metabolic pathways           | 0.00349966  | Atp5h; Cox15;<br>Cyp1a1; Fut2; Gatm;<br>Ggt1; Idh2; Lao1; Lipf;<br>Nme4; Pigx; Pla2g10;                | Metabolic pathways           |
| 216 | FR366845                           | Metabolic pathways           | 0.00349966  | Atp5h; Cox15;<br>Cyp1a1; Fut2; Gatm;<br>Ggt1; Idh2; Lao1; Lipf;<br>Nme4; Pigx; Pla2g10;                | Metabolic pathways           |
| 217 | FR279620                           | Metabolic pathways           | 0.00349966  | Atp5h; Cox15;<br>Cyp1a1; Fut2; Gatm;<br>Ggt1; Idh2; Lao1; Lipf;<br>Nme4; Pigx; Pla2g10;                | Metabolic pathways           |
| 218 | XR_141936.2                        | Metabolic pathways           | 0.00349966  | Atp5h; Cox15;<br>Cyp1a1; Fut2; Gatm;<br>Ggt1; Idh2; Lao1; Lipf;<br>Nme4; Pigx; Pla2g10;                | Metabolic pathways           |
| 219 | n289317                            | Metabolic pathways           | 0.00349966  | Atp5h; Cox15;<br>Cyp1a1; Fut2; Gatm;<br>Ggt1; Idh2; Lao1; Lipf;<br>Nme4; Pigx; Pla2g10;                | Metabolic pathways           |
| 220 | FR194887                           | TNF signaling pathway        | 0.003510169 | Bcl3; Cx3cl1; Cxcl1;<br>Vcam1                                                                          | TNF signaling pathway        |
| 221 | FR398266                           | PPAR signaling pathway       | 0.003532455 | Angptl4; Cpt2; Fabp3                                                                                   | PPAR signaling pathway       |
| 222 | FR100205                           | PPAR signaling pathway       | 0.003532455 | Angptl4; Cpt2; Fabp3                                                                                   | PPAR signaling pathway       |
| 223 | FR040835                           | Thyroid hormone<br>synthesis | 0.003546787 | Lrp2; Tg; Tshr                                                                                         | Thyroid hormone<br>synthesis |

|     |                                                 |                                           |             |                                                                                                         |                                           |
|-----|-------------------------------------------------|-------------------------------------------|-------------|---------------------------------------------------------------------------------------------------------|-------------------------------------------|
| 224 | chr6_86425510<br>_86450160_F                    | TNF signaling pathway                     | 0.003634747 | Bcl3; Cxcl1; Vcam1                                                                                      | TNF signaling pathway                     |
| 225 | XR_140871.1                                     | Tryptophan metabolism                     | 0.003643849 | Cyp1a1; Lao1; Tph1                                                                                      | Tryptophan metabolism                     |
| 226 | chr18_6992341<br>0_69965360_R                   | Tryptophan metabolism                     | 0.003643849 | Cyp1a1; Lao1; Tph1                                                                                      | Tryptophan metabolism                     |
| 227 | NR_073368.1                                     | Tryptophan metabolism                     | 0.003846365 | Cyp1a1; Lao1; Tph1                                                                                      | Tryptophan metabolism                     |
| 228 | chr13_3469340<br>4_34717987_F<br>chr13_15125001 | Tryptophan metabolism                     | 0.003846365 | Cyp1a1; Lao1; Tph1                                                                                      | Tryptophan metabolism                     |
| 229 | 0_157249445_                                    | Tryptophan metabolism                     | 0.003846365 | Cyp1a1; Lao1; Tph1                                                                                      | Tryptophan metabolism                     |
| 230 | chr9_66976750<br>_67014625_F                    | Tryptophan metabolism                     | 0.003846365 | Cyp1a1; Lao1; Tph1                                                                                      | Tryptophan metabolism                     |
| 231 | FR134333                                        | Thyroid hormone<br>synthesis              | 0.003864027 | Lrp2; Tg; Tshr                                                                                          | Thyroid hormone<br>synthesis              |
| 232 | n291764                                         | Thyroid hormone<br>synthesis              | 0.003864027 | Lrp2; Tg; Tshr                                                                                          | Thyroid hormone<br>synthesis              |
| 233 | n415399                                         | Phagosome                                 | 0.003915636 | Cd209a; Cd209f;<br>Clec7a; Ncf4                                                                         | Phagosome                                 |
| 234 | FR180118                                        | Phagosome                                 | 0.003915636 | Cd209a; Cd209f;<br>Clec7a; Ncf4                                                                         | Phagosome                                 |
| 235 | FR047247                                        | Tryptophan metabolism                     | 0.004055633 | Cyp1a1; Lao1; Tph1                                                                                      | Tryptophan metabolism                     |
| 236 | chr6_47959825<br>_47960502_R                    | Tryptophan metabolism                     | 0.004055633 | Cyp1a1; Lao1; Tph1                                                                                      | Tryptophan metabolism                     |
| 237 | chr13_7632622<br>8_76332632_F                   | Tryptophan metabolism                     | 0.004055633 | Cyp1a1; Lao1; Tph1                                                                                      | Tryptophan metabolism                     |
| 238 | ENSMUST000<br>00141575                          | Tryptophan metabolism                     | 0.004055633 | Cyp1a1; Lao1; Tph1                                                                                      | Tryptophan metabolism                     |
| 239 | chr8_96983590<br>_96994419_F                    | NOD-like receptor<br>signaling pathway    | 0.00409879  | Cxcl1; Mefv; Naip2                                                                                      | NOD-like receptor<br>signaling pathway    |
| 240 | chr9_27148989<br>_27155714_R                    | Cell adhesion molecules<br>(CAMs)         | 0.004175518 | Icos; Nrnx2; Sdc3; Selp                                                                                 | Cell adhesion molecules<br>(CAMs)         |
| 241 | chr7_31709550<br>_31723025_F                    | Tryptophan metabolism                     | 0.004271722 | Cyp1a1; Lao1; Tph1                                                                                      | Tryptophan metabolism                     |
| 242 | FR204953                                        | Tryptophan metabolism                     | 0.004271722 | Cyp1a1; Lao1; Tph1                                                                                      | Tryptophan metabolism                     |
| 243 | n418309                                         | Tryptophan metabolism                     | 0.004271722 | Cyp1a1; Lao1; Tph1                                                                                      | Tryptophan metabolism                     |
| 244 | chr15_6073220<br>9_60732822_R                   | Tryptophan metabolism                     | 0.004271722 | Cyp1a1; Lao1; Tph1                                                                                      | Tryptophan metabolism                     |
| 245 | chr4_12357209<br>0_123581365_F                  | Cytokine-cytokine<br>receptor interaction | 0.004315273 | Csf2rb; Cx3cl1; Gdf5;<br>Il20ra                                                                         | Cytokine-cytokine<br>receptor interaction |
| 246 | FR194887                                        | NOD-like receptor<br>signaling pathway    | 0.004375265 | Cxcl1; Mefv; Naip2                                                                                      | NOD-like receptor<br>signaling pathway    |
| 247 | FR078628                                        | Metabolic pathways                        | 0.004465267 | Atp5h; Cox15;<br>Cyp1a1; Fut2; Gatm;<br>Ggt1; Idh2; Impdh1;<br>Lao1; Lipf; Nme4;<br>Pigx; Pla2g10; Tph1 | Metabolic pathways                        |
| 248 | XR_105914.2<br>chr10_11540802                   | Tryptophan metabolism                     | 0.004494698 | Cyp1a1; Lao1; Tph1                                                                                      | Tryptophan metabolism                     |
| 249 | 5_115489250_                                    | Tryptophan metabolism                     | 0.004494698 | Cyp1a1; Lao1; Tph1                                                                                      | Tryptophan metabolism                     |
| 250 | FR330268                                        | Tryptophan metabolism                     | 0.004494698 | Cyp1a1; Lao1; Tph1                                                                                      | Tryptophan metabolism                     |
| 251 | FR160504                                        | Tryptophan metabolism                     | 0.004494698 | Cyp1a1; Lao1; Tph1                                                                                      | Tryptophan metabolism                     |
| 252 | n290544                                         | Tryptophan metabolism                     | 0.004494698 | Cyp1a1; Lao1; Tph1                                                                                      | Tryptophan metabolism                     |

|     |                                |                                        |             |                                                                                                           |                                        |
|-----|--------------------------------|----------------------------------------|-------------|-----------------------------------------------------------------------------------------------------------|----------------------------------------|
| 253 | chr19_3304947<br>9_33054553_R  | Renin-angiotensin<br>system            | 0.004527167 | Cma1; Nln<br>Atp3n; Cox15;<br>Cyp1a1; Fut2; Gatm;                                                         | Renin-angiotensin system               |
| 254 | FR186619                       | Metabolic pathways                     | 0.00459519  | Ggt1; Idh2; Lao1; Lipf;<br>Nme4; Pigx; Pla2g10;<br>Atp3n; Cox15;<br>Cyp1a1; Fut2; Gatm;                   | Metabolic pathways                     |
| 255 | NR_033641.2                    | Metabolic pathways                     | 0.00459519  | Ggt1; Idh2; Lao1; Lipf;<br>Nme4; Pigx; Pla2g10;<br>Tph1<br>Cox15; Cyp1a1; Fut2;<br>Gatm; Ggt1; Idh2;      | Metabolic pathways                     |
| 256 | FR114000                       | Metabolic pathways                     | 0.004645024 | Lao1; Lipf; Nme4;<br>Pigx; Pla2g10; Tph1                                                                  | Metabolic pathways                     |
| 257 | ENSMUST000<br>00125250         | Tryptophan metabolism                  | 0.004724625 | Cyp1a1; Lao1; Tph1                                                                                        | Tryptophan metabolism                  |
| 258 | FR278883                       | Tryptophan metabolism                  | 0.004724625 | Cyp1a1; Lao1; Tph1                                                                                        | Tryptophan metabolism                  |
| 259 | chr5_35893908<br>_35896613_R   | Tryptophan metabolism                  | 0.004724625 | Cyp1a1; Lao1; Tph1                                                                                        | Tryptophan metabolism                  |
| 260 | n343233                        | NOD-like receptor<br>signaling pathway | 0.004961566 | Cxcl1; Mefv; Naip2                                                                                        | NOD-like receptor<br>signaling pathway |
| 261 | FR055065                       | Tryptophan metabolism                  | 0.004961566 | Cyp1a1; Lao1; Tph1                                                                                        | Tryptophan metabolism                  |
| 262 | chr1_18378330<br>6_183834531_F | Tryptophan metabolism                  | 0.004961566 | Cyp1a1; Lao1; Tph1                                                                                        | Tryptophan metabolism                  |
| 263 | FR247760                       | Tryptophan metabolism                  | 0.004961566 | Cyp1a1; Lao1; Tph1                                                                                        | Tryptophan metabolism                  |
| 264 | FR251112                       | Tryptophan metabolism                  | 0.004961566 | Cyp1a1; Lao1; Tph1                                                                                        | Tryptophan metabolism                  |
| 265 | chr8_48476637<br>_48492537_F   | TNF signaling pathway                  | 0.005186589 | Bcl3; Cx3cl1; Cxcl1;<br>Vcam1                                                                             | TNF signaling pathway                  |
| 266 | FR082156                       | Tryptophan metabolism                  | 0.005205581 | Cyp1a1; Lao1; Tph1                                                                                        | Tryptophan metabolism                  |
| 267 | chr14_2592329<br>5_25923893_F  | Tryptophan metabolism                  | 0.005205581 | Cyp1a1; Lao1; Tph1                                                                                        | Tryptophan metabolism                  |
| 268 | FR351980                       | Tryptophan metabolism                  | 0.005205581 | Cyp1a1; Lao1; Tph1                                                                                        | Tryptophan metabolism                  |
| 269 | chr10_6226234<br>1_62269593_F  | Thyroid hormone<br>synthesis           | 0.005303312 | Lrp2; Tg; Tshr<br>Atp3n; Cox15;<br>Cyp1a1; Fut2; Gatm;<br>Ggt1; Idh2; Impdh1;                             | Thyroid hormone<br>synthesis           |
| 270 | n290305                        | Metabolic pathways                     | 0.005404269 | Lao1; Lipf; Nme4;<br>Phgdh; Pigx; Pla2g10;<br>Atp3n; Cox15;<br>Cyp1a1; Fut2; Gatm;<br>Ggt1; Idh2; Impdh1; | Metabolic pathways                     |
| 271 | FR028809                       | Metabolic pathways                     | 0.005404269 | Lao1; Lipf; Nme4;<br>Phgdh; Pigx; Pla2g10;<br>Tph1                                                        | Metabolic pathways                     |
| 272 | chr3_21964899<br>_21974524_F   | PPAR signaling pathway                 | 0.005567243 | Angptl4; Cpt2; Fabp3<br>Atp5h; Cox15;<br>Cyp1a1; Fut2; Gatm;                                              | PPAR signaling pathway                 |
| 273 | FR007873                       | Metabolic pathways                     | 0.005701445 | Ggt1; Idh2; Lao1; Lipf;<br>Nme4; Phgdh; Pigx;<br>Pla2g10; Tph1                                            | Metabolic pathways                     |

|     |                                     |                                        |             |                                                                                                                           |                                        |
|-----|-------------------------------------|----------------------------------------|-------------|---------------------------------------------------------------------------------------------------------------------------|----------------------------------------|
| 274 | n265955                             | Metabolic pathways                     | 0.005701445 | Atp5h; Cox15;<br>Cyp1a1; Fut2; Gatm;<br>Ggt1; Idh2; Lao1; Lipf; Metabolic pathways<br>Nme4; Phgdh; Pigx;<br>Pla2g10; Tph1 |                                        |
| 275 | n265736                             | Metabolic pathways                     | 0.005701445 | Atp5h; Cox15;<br>Cyp1a1; Fut2; Gatm;<br>Ggt1; Idh2; Lao1; Lipf; Metabolic pathways<br>Nme4; Phgdh; Pigx;<br>Pla2g10; Tph1 |                                        |
| 276 | chr17_2937475<br>8_29387733_R       | Metabolic pathways                     | 0.005701445 | Atp5h; Cox15;<br>Cyp1a1; Fut2; Gatm;<br>Ggt1; Idh2; Lao1; Lipf; Metabolic pathways<br>Nme4; Phgdh; Pigx;<br>Pla2g10; Tph1 |                                        |
| 277 | FR333763                            | Bile secretion                         | 0.005706931 | Aqp4; Nceh1; Sctr                                                                                                         | Bile secretion                         |
| 278 | FR087925                            | Thyroid hormone<br>synthesis           | 0.005706931 | Lrp2; Tg; Tshr                                                                                                            | Thyroid hormone<br>synthesis           |
| 279 | chr2_11679688<br>7_116797441_F      | Thyroid hormone<br>synthesis           | 0.005706931 | Lrp2; Tg; Tshr                                                                                                            | Thyroid hormone<br>synthesis           |
| 280 | FR099681                            | Thyroid hormone<br>synthesis           | 0.005706931 | Lrp2; Tg; Tshr                                                                                                            | Thyroid hormone<br>synthesis           |
| 281 | FR086793                            | Thyroid hormone<br>synthesis           | 0.005706931 | Lrp2; Tg; Tshr                                                                                                            | Thyroid hormone<br>synthesis           |
| 282 | uc.427+                             | Tryptophan metabolism                  | 0.005715068 | Cyp1a1; Lao1; Tph1                                                                                                        | Tryptophan metabolism                  |
| 283 | FR167447                            | Renin-angiotensin<br>system            | 0.00573467  | Cma1; Nln                                                                                                                 | Renin-angiotensin system               |
| 284 | chr8_48476637<br>_48492537_F        | NOD-like receptor<br>signaling pathway | 0.005926231 | Cxcl1; Mefv; Naip2<br>Atp5h; Cox15;<br>Cyp1a1; Fut2; Gatm;                                                                | NOD-like receptor<br>signaling pathway |
| 285 | FR301809                            | Metabolic pathways                     | 0.005950349 | Ggt1; Idh2; Lao1; Lipf; Metabolic pathways<br>Nme4; Pigx; Pla2g10;<br>Atp5h; Cox15;<br>Cyp1a1; Fut2; Gatm;                |                                        |
| 286 | FR168142                            | Metabolic pathways                     | 0.005950349 | Ggt1; Idh2; Lao1; Lipf; Metabolic pathways<br>Nme4; Pigx; Pla2g10;<br>Atp5h; Cox15;<br>Cyp1a1; Fut2; Gatm;                |                                        |
| 287 | chr13_1078220<br>42_107823753_<br>F | Metabolic pathways                     | 0.005950349 | Ggt1; Idh2; Lao1; Lipf; Metabolic pathways<br>Nme4; Pigx; Pla2g10;<br>Atp5h; Cox15;<br>Cyp1a1; Fut2; Gatm;                |                                        |
| 288 | FR268824                            | Metabolic pathways                     | 0.005950349 | Ggt1; Idh2; Lao1; Lipf; Metabolic pathways<br>Nme4; Pigx; Pla2g10;<br>Atp5h; Cox15;<br>Cyp1a1; Fut2; Gatm;                |                                        |
| 289 | chr8_41475940<br>_41476460_F        | Metabolic pathways                     | 0.005950349 | Ggt1; Idh2; Lipf; Metabolic pathways<br>Nme4; Phgdh; Pigx;<br>Pla2g10; Tph1                                               | Metabolic pathways                     |
| 290 | FR087537                            | Tryptophan metabolism                  | 0.005980654 | Cyp1a1; Lao1; Tph1                                                                                                        | Tryptophan metabolism                  |
| 291 | FR155648                            | PPAR signaling pathway                 | 0.006042699 | Angptl4; Cpt2; Fabp3                                                                                                      | PPAR signaling pathway                 |
| 292 | chr11_1200411<br>24_120052299_<br>C | Thyroid hormone<br>synthesis           | 0.006128517 | Lrp2; Tg; Tshr                                                                                                            | Thyroid hormone<br>synthesis           |

|     |                                            |                                         |             |                                                                                             |                                         |
|-----|--------------------------------------------|-----------------------------------------|-------------|---------------------------------------------------------------------------------------------|-----------------------------------------|
| 293 | chr6_86425510_86450160_F                   | Cytokine-cytokine receptor interaction  | 0.006172435 | Csf2rb; Cxcl1; Gdf5; Il20ra                                                                 | Cytokine-cytokine receptor interaction  |
| 294 | chr17_64063362_64066067_R                  | Tryptophan metabolism                   | 0.006253539 | Cyp1a1; Lao1; Tph1                                                                          | Tryptophan metabolism                   |
| 295 | FR263105                                   | NOD-like receptor signaling pathway     | 0.006270969 | Cxcl1; Mefv; Naip2                                                                          | NOD-like receptor signaling pathway     |
| 296 | chr14_21621875_21638625_R<br>GILV_10319221 | Tryptophan metabolism                   | 0.006533777 | Cyp1a1; Lao1; Tph1                                                                          | Tryptophan metabolism                   |
| 297 | 7_165807952_n                              | Tryptophan metabolism                   | 0.006533777 | Cyp1a1; Lao1; Tph1                                                                          | Tryptophan metabolism                   |
| 298 | FR064953                                   | Bile secretion                          | 0.006568273 | Aqp4; Nceh1; Sctr                                                                           | Bile secretion                          |
| 299 | FR019981                                   | Thyroid hormone synthesis               | 0.006568273 | Lrp2; Tg; Tshr                                                                              | Thyroid hormone synthesis               |
| 300 | FR395572                                   | Thyroid hormone synthesis               | 0.006568273 | Lrp2; Tg; Tshr                                                                              | Thyroid hormone synthesis               |
| 301 | FR375933                                   | Neuroactive ligand-receptor interaction | 0.006637251 | Grid2; Grik3; P2ry1; Sctr; Tshr                                                             | Neuroactive ligand-receptor interaction |
| 302 | chr4_123572090_123581365_F                 | Malaria                                 | 0.006795397 | Selp; Vcam1                                                                                 | Malaria                                 |
| 303 | FR003529                                   | Tryptophan metabolism                   | 0.006821418 | Cyp1a1; Lao1; Tph1                                                                          | Tryptophan metabolism                   |
| 304 | FR219193                                   | Tryptophan metabolism                   | 0.006821418 | Cyp1a1; Lao1; Tph1                                                                          | Tryptophan metabolism                   |
| 305 | ENSMUST00000125309                         | Tryptophan metabolism                   | 0.00711651  | Cyp1a1; Lao1; Tph1                                                                          | Tryptophan metabolism                   |
| 306 | ENSMUST00000130677                         | Tryptophan metabolism                   | 0.00711651  | Cyp1a1; Lao1; Tph1                                                                          | Tryptophan metabolism                   |
| 307 | n295927                                    | Lysosome                                | 0.007175044 | Acp5; Cd68; Ctsz                                                                            | Lysosome                                |
| 308 | n280963                                    | Lysosome                                | 0.007175044 | Acp5; Cd68; Ctsz                                                                            | Lysosome                                |
| 309 | FR337786                                   | Metabolic pathways                      | 0.007197849 | Atp5h; Cox15; Cyp1a1; Fut2; Gatm; Ggt1; Idh2; Impdh1; Lao1; Lipf; Nme4; Pigx; Pla2g10; Tph1 | Metabolic pathways                      |
| 310 | Gomafu                                     | Metabolic pathways                      | 0.007197849 | Atp5h; Cox15; Cyp1a1; Fut2; Gatm; Ggt1; Idh2; Lao1; Lipf; Nme4; Phgdh; Pigx; Pla2g10; Tph1  | Metabolic pathways                      |
| 311 | FR199374                                   | Metabolic pathways                      | 0.007197849 | Atp5h; Cox15; Cyp1a1; Fut2; Gatm; Ggt1; Idh2; Lao1; Lipf; Nme4; Phgdh; Pigx; Pla2g10; Tph1  | Metabolic pathways                      |
| 312 | FR302003                                   | Metabolic pathways                      | 0.007197849 | Atp5h; Cox15; Cyp1a1; Fut2; Gatm; Ggt1; Idh2; Lao1; Lipf; Nme4; Phgdh; Pigx; Pla2g10; Tph1  | Metabolic pathways                      |
| 313 | FR266999                                   | Metabolic pathways                      | 0.007197849 | Atp5h; Cox15; Cyp1a1; Fut2; Gatm; Ggt1; Idh2; Lao1; Lipf; Nme4; Phgdh; Pigx; Pla2g10; Tph1  | Metabolic pathways                      |

|     |                               |                                         |             |                                                                                                        |                                         |
|-----|-------------------------------|-----------------------------------------|-------------|--------------------------------------------------------------------------------------------------------|-----------------------------------------|
| 314 | FR249432                      | Metabolic pathways                      | 0.007197849 | Atp5h; Cox15;<br>Cyp1a1; Fut2; Gatm;<br>Ggt1; Idh2; Lao1; Lipf;<br>Nme4; Phgdh; Pigx;<br>Pla2g10; Tph1 | Metabolic pathways                      |
| 315 | FR071800                      | Ether lipid metabolism                  | 0.007500921 | Pla2g10; Pla2g7                                                                                        | Ether lipid metabolism                  |
| 316 | chr9_27155685_27156100_F      | Ether lipid metabolism                  | 0.007500921 | Pla2g10; Pla2g7                                                                                        | Ether lipid metabolism                  |
| 317 | chr10_129151511_2_129208737_D | Thyroid hormone synthesis               | 0.007503069 | Lrp2; Tg; Tshr                                                                                         | Thyroid hormone synthesis               |
| 318 | FR341317                      | Cell adhesion molecules (CAMs)          | 0.007533614 | Icos; Nrnx2; Sdc3;<br>Selp; Vcam1                                                                      | Cell adhesion molecules (CAMs)          |
| 319 | n291764                       | Neuroactive ligand-receptor interaction | 0.007552673 | Grid2; Grik3; P2ry1;<br>Sctr; Tshr<br>Atp5b; Cox15;<br>Cyp1a1; Fut2; Gatm;                             | Neuroactive ligand-receptor interaction |
| 320 | ENSMUST00000134627            | Metabolic pathways                      | 0.007605712 | Ggt1; Idh2; Lao1; Lipf;<br>Nme4; Pigx; Pla2g10;<br>Atp5b; Cox15;<br>Cyp1a1; Fut2; Gatm;                | Metabolic pathways                      |
| 321 | FR208702                      | Metabolic pathways                      | 0.007605712 | Ggt1; Idh2; Lipf;<br>Nme4; Phgdh; Pigx;<br>Atp5b; Cox15;<br>Cyp1a1; Fut2; Gatm;                        | Metabolic pathways                      |
| 322 | chr1_75075500_75102200_R      | Metabolic pathways                      | 0.007605712 | Ggt1; Idh2; Lao1; Lipf;<br>Nme4; Pigx; Pla2g10;<br>Atp5b; Cox15;<br>Cyp1a1; Fut2; Gatm;                | Metabolic pathways                      |
| 323 | chr13_98038568_98068079_F     | Metabolic pathways                      | 0.007605712 | Ggt1; Idh2; Lipf;<br>Nme4; Phgdh; Pigx;<br>Pla2g10; Tph1<br>Cox15; Cyp1a1; Fut2;<br>Gatm; Ggt1; Idh2;  | Metabolic pathways                      |
| 324 | NR_045899.1                   | Metabolic pathways                      | 0.007605712 | Impdh1; Lao1; Lipf;<br>Nme4; Pigx; Pla2g10;<br>Tph1                                                    | Metabolic pathways                      |
| 325 | n280963                       | Osteoclast differentiation              | 0.007668009 | Acp5; Ncf4; Sirpb1a                                                                                    | Osteoclast differentiation              |
| 326 | chr2_71576218_71603818_R      | Tryptophan metabolism                   | 0.007729237 | Cyp1a1; Lao1; Tph1                                                                                     | Tryptophan metabolism                   |
| 327 | FR055102                      | Tryptophan metabolism                   | 0.007729237 | Cyp1a1; Lao1; Tph1                                                                                     | Tryptophan metabolism                   |
| 328 | NR_102339.1                   | Phagosome                               | 0.007768222 | Cd209a; Cd209f;<br>Clec7a; Ncf4<br>Cox15; Cyp1a1; Fut2;<br>Gatm; Ggt1; Idh2;                           | Phagosome                               |
| 329 | chr2_35828611_35838083_F      | Metabolic pathways                      | 0.007944732 | Lao1; Lipf; Nme4;<br>Pigx; Pla2g10; Tph1<br>Cox15; Cyp1a1; Fut2;<br>Gatm; Ggt1; Idh2;                  | Metabolic pathways                      |
| 330 | FR215148                      | Metabolic pathways                      | 0.007944732 | Lao1; Lipf; Nme4;<br>Pigx; Pla2g10; Tph1                                                               | Metabolic pathways                      |

|     |                                     |                                                    |             |                                                                                                                   |                                                    |
|-----|-------------------------------------|----------------------------------------------------|-------------|-------------------------------------------------------------------------------------------------------------------|----------------------------------------------------|
| 331 | FR032503                            | Metabolic pathways                                 | 0.007944732 | Cox15; Cyp1a1; Fut2;<br>Gatm; Ggt1; Idh2;<br>Lao1; Lipf; Nme4;<br>Pigx; Pla2g10; Tph1                             | Metabolic pathways                                 |
| 332 | ENSMUST000<br>00174110              | Bile secretion                                     | 0.007998466 | Aqp4; Nceh1; Sctr                                                                                                 | Bile secretion                                     |
| 333 | FR010306                            | Thyroid hormone<br>synthesis                       | 0.007998466 | Lrp2; Tg; Tshr                                                                                                    | Thyroid hormone<br>synthesis                       |
| 334 | n292619                             | Bile secretion                                     | 0.007998466 | Aqp4; Nceh1; Sctr                                                                                                 | Bile secretion                                     |
| 335 | n415399                             | TNF signaling pathway                              | 0.008019399 | Bcl3; Cx3cl1; Vcam1                                                                                               | TNF signaling pathway                              |
| 336 | FR180118                            | TNF signaling pathway                              | 0.008019399 | Bcl3; Cx3cl1; Vcam1                                                                                               | TNF signaling pathway                              |
| 337 | FR000826                            | TNF signaling pathway                              | 0.008019399 | Bcl3; Cx3cl1; Vcam1                                                                                               | TNF signaling pathway                              |
| 338 | FR323263                            | Cell adhesion molecules<br>(CAMs)                  | 0.008083092 | Icos; Nrnx2; Sdc3;<br>Selp; Vcam1                                                                                 | Cell adhesion molecules<br>(CAMs)                  |
| 339 | FR204953                            | NOD-like receptor<br>signaling pathway             | 0.008173144 | Cxcl1; Mefv; Naip2                                                                                                | NOD-like receptor<br>signaling pathway             |
| 340 | chr6_86425510<br>_86450160_F        | Malaria                                            | 0.008196253 | Selp; Vcam1                                                                                                       | Malaria                                            |
| 341 | n263541                             | Metabolic pathways                                 | 0.00835905  | Atp5n; Cox15;<br>Cyp1a1; Fut2; Gatm;<br>Ggt1; Idh2; Impdh1;<br>Lao1; Lipf; Nme4;<br>Phgdh; Pigx; Pla2g10;<br>Tph1 | Metabolic pathways                                 |
| 342 | chr12_1112877<br>72_111333890_<br>F | Metabolic pathways                                 | 0.00835905  | Atp5n; Cox15;<br>Cyp1a1; Fut2; Gatm;<br>Ggt1; Idh2; Impdh1;<br>Lao1; Lipf; Nme4;<br>Phgdh; Pigx; Pla2g10;<br>Tph1 | Metabolic pathways                                 |
| 343 | FR358023                            | Thyroid hormone<br>synthesis                       | 0.008512754 | Lrp2; Tg; Tshr                                                                                                    | Thyroid hormone<br>synthesis                       |
| 344 | FR392828                            | Thyroid hormone<br>synthesis                       | 0.008512754 | Lrp2; Tg; Tshr                                                                                                    | Thyroid hormone<br>synthesis                       |
| 345 | FR391590                            | Thyroid hormone<br>synthesis                       | 0.008512754 | Lrp2; Tg; Tshr                                                                                                    | Thyroid hormone<br>synthesis                       |
| 346 | FR060087                            | Bile secretion                                     | 0.008512754 | Aqp4; Nceh1; Sctr                                                                                                 | Bile secretion                                     |
| 347 | FR333763                            | Cell adhesion molecules<br>(CAMs)                  | 0.008532116 | Nrnx2; Sdc3; Selp;<br>Vcam1                                                                                       | Cell adhesion molecules<br>(CAMs)                  |
| 348 | FR029539                            | Phagosome                                          | 0.008587395 | Cd209a; Cd209f;<br>Clec7a; Ncf4                                                                                   | Phagosome                                          |
| 349 | ENSMUST000<br>00149707              | Phagosome                                          | 0.008587395 | Cd209a; Cd209f;<br>Clec7a; Ncf4                                                                                   | Phagosome                                          |
| 350 | FR160504                            | NOD-like receptor<br>signaling pathway             | 0.008589923 | Cxcl1; Mefv; Naip2                                                                                                | NOD-like receptor<br>signaling pathway             |
| 351 | FR330268                            | NOD-like receptor<br>signaling pathway             | 0.008589923 | Cxcl1; Mefv; Naip2                                                                                                | NOD-like receptor<br>signaling pathway             |
| 352 | n290544                             | NOD-like receptor<br>signaling pathway             | 0.008589923 | Cxcl1; Mefv; Naip2                                                                                                | NOD-like receptor<br>signaling pathway             |
| 353 | XR_105914.2                         | NOD-like receptor<br>signaling pathway             | 0.008589923 | Cxcl1; Mefv; Naip2                                                                                                | NOD-like receptor<br>signaling pathway             |
| 354 | FR269524                            | Intestinal immune<br>network for IgA<br>production | 0.008771691 | Icos; Pigr                                                                                                        | Intestinal immune<br>network for IgA<br>production |
| 355 | FR269524                            | Ether lipid metabolism                             | 0.008771691 | Pla2g10; Pla2g7                                                                                                   | Ether lipid metabolism                             |



|     |                                     |                                     |             |                                                                                                        |                                     |
|-----|-------------------------------------|-------------------------------------|-------------|--------------------------------------------------------------------------------------------------------|-------------------------------------|
| 356 | FR283503                            | TNF signaling pathway               | 0.008818603 | Bcl3; Cxcl1; Vcam1                                                                                     | TNF signaling pathway               |
| 357 | n283487                             | TNF signaling pathway               | 0.008818603 | Bcl3; Cx3cl1; Vcam1                                                                                    | TNF signaling pathway               |
| 358 | FR278883                            | TNF signaling pathway               | 0.008860512 | Bcl3; Cx3cl1; Cxcl1; Vcam1                                                                             | TNF signaling pathway               |
| 359 | uc.83+                              | Tryptophan metabolism               | 0.008948342 | Lao1; Tph1<br>Atp5h; Cox15; Fut2;<br>Gatm; Ggt1; Idh2;                                                 | Tryptophan metabolism               |
| 360 | n273954                             | Metabolic pathways                  | 0.008990521 | Impdh1; Lao1; Lipf;<br>Nme4; Phgdh; Pigx;<br>Pla2g10; Tph1<br>Atp5h; Cox15;<br>Cyp1a1; Fut2; Gatm;     | Metabolic pathways                  |
| 361 | FR019091                            | Metabolic pathways                  | 0.008990521 | Ggt1; Idh2; Lao1; Lipf;<br>Nme4; Phgdh; Pigx;<br>Pla2g10; Tph1<br>Atp5h; Cox15;<br>Cyp1a1; Fut2; Gatm; | Metabolic pathways                  |
| 362 | n296710                             | Metabolic pathways                  | 0.008990521 | Ggt1; Idh2; Lao1; Lipf;<br>Nme4; Phgdh; Pigx;<br>Pla2g10; Tph1<br>Atp5h; Cox15;<br>Cyp1a1; Fut2; Gatm; | Metabolic pathways                  |
| 363 | chr1_16296500<br>1_162966376_F      | Metabolic pathways                  | 0.008990521 | Ggt1; Idh2; Lao1; Lipf;<br>Nme4; Phgdh; Pigx;<br>Pla2g10; Tph1<br>Atp5h; Cox15;<br>Cyp1a1; Fut2; Gatm; | Metabolic pathways                  |
| 364 | FR185165                            | Metabolic pathways                  | 0.008990521 | Ggt1; Idh2; Lao1; Lipf;<br>Nme4; Phgdh; Pigx;<br>Pla2g10; Tph1<br>Atp5h; Cox15;<br>Cyp1a1; Fut2; Gatm; | Metabolic pathways                  |
| 365 | chr12_1100032<br>68_110030953_<br>F | Metabolic pathways                  | 0.008990521 | Ggt1; Idh2; Lao1; Lipf;<br>Nme4; Phgdh; Pigx;<br>Pla2g10; Tph1<br>Atp5h; Cox15;<br>Cyp1a1; Fut2; Gatm; | Metabolic pathways                  |
| 366 | chr1_13847351<br>4_138476054_<br>R  | Metabolic pathways                  | 0.008990521 | Ggt1; Idh2; Lao1; Lipf;<br>Nme4; Phgdh; Pigx;<br>Pla2g10; Tph1<br>Atp5h; Cox15;<br>Cyp1a1; Fut2; Gatm; | Metabolic pathways                  |
| 367 | chr5_31883451<br>_31884082_F        | Metabolic pathways                  | 0.008990521 | Ggt1; Idh2; Lao1; Lipf;<br>Nme4; Phgdh; Pigx;<br>Pla2g10; Tph1                                         | Metabolic pathways                  |
| 368 | FR278883                            | NOD-like receptor signaling pathway | 0.009019012 | Cxcl1; Mefv; Naip2                                                                                     | NOD-like receptor signaling pathway |
| 369 | XR_140433.1                         | Thyroid hormone synthesis           | 0.009046086 | Lrp2; Tg; Tshr                                                                                         | Thyroid hormone synthesis           |
| 370 | ENSMUST000<br>00181563              | Thyroid hormone synthesis           | 0.009046086 | Lrp2; Tg; Tshr                                                                                         | Thyroid hormone synthesis           |
| 371 | FR365932                            | Thyroid hormone synthesis           | 0.009046086 | Lrp2; Tg; Tshr                                                                                         | Thyroid hormone synthesis           |

|     |                             |                                          |             |                                                                                                            |                                          |
|-----|-----------------------------|------------------------------------------|-------------|------------------------------------------------------------------------------------------------------------|------------------------------------------|
| 372 | FR085857                    | Ether lipid metabolism                   | 0.009440719 | Pla2g10; Pla2g7                                                                                            | Ether lipid metabolism                   |
| 373 | FR278883                    | Renin-angiotensin system                 | 0.009480729 | Cma1; Nln                                                                                                  | Renin-angiotensin system                 |
| 374 | FR238565                    | Thyroid hormone synthesis                | 0.009598609 | Lrp2; Tg; Tshr                                                                                             | Thyroid hormone synthesis                |
| 375 | chr7_82902248_82955248_F    | Thyroid hormone synthesis                | 0.009598609 | Lrp2; Tg; Tshr                                                                                             | Thyroid hormone synthesis                |
| 376 | chr3_21964899_21974885_F    | Thyroid hormone synthesis                | 0.009598609 | Lrp2; Tg; Tshr                                                                                             | Thyroid hormone synthesis                |
| 377 | FR294279                    | Metabolic pathways                       | 0.009604081 | Atp2a1; Cox15; Cyp1a1; Fut2; Gatm; Ggt1; Idh2; Lipf; Nme4; Phgdh; Pigx; Pla2g10; Tph1; Cyp1a1; Fut2; Gatm; | Metabolic pathways                       |
| 378 | n294791                     | Metabolic pathways                       | 0.009604081 | Ggt1; Idh2; Lipf; Nme4; Phgdh; Pigx; Pla2g10; Tph1; Cyp1a1; Fut2; Gatm;                                    | Metabolic pathways                       |
| 379 | chr7_91558475_91733625_R    | Metabolic pathways                       | 0.009604081 | Ggt1; Idh2; Impdh1; Lao1; Lipf; Nme4; Pla2g10; Tph1                                                        | Metabolic pathways                       |
| 380 | FR106089                    | TNF signaling pathway                    | 0.009662888 | Bcl3; Cxcl1; Vcam1                                                                                         | TNF signaling pathway                    |
| 381 | FR388349                    | TNF signaling pathway                    | 0.009662888 | Bcl3; Cx3cl1; Vcam1                                                                                        | TNF signaling pathway                    |
| 382 | n415206                     | Glycine, serine and threonine metabolism | 0.009671092 | Gatm; Phgdh                                                                                                | Glycine, serine and threonine metabolism |
| 383 | FR057875                    | Glycine, serine and threonine metabolism | 0.009671092 | Gatm; Phgdh                                                                                                | Glycine, serine and threonine metabolism |
| 384 | FR007551                    | Tryptophan metabolism                    | 0.009750852 | Cyp1a1; Lao1; Tph1                                                                                         | Tryptophan metabolism                    |
| 385 | FR054246                    | NOD-like receptor signaling pathway      | 0.009914424 | Cxcl1; Mefv; Naip2                                                                                         | NOD-like receptor signaling pathway      |
| 386 | FR384764                    | Renin-angiotensin system                 | 0.010132224 | Cma1; Nln                                                                                                  | Renin-angiotensin system                 |
| 387 | FR149067                    | Metabolic pathways                       | 0.010167268 | Cox15; Cyp1a1; Fut2; Gatm; Ggt1; Idh2; Lao1; Lipf; Nme4; Pigx; Pla2g10; Tph1                               | Metabolic pathways                       |
| 388 | chr8_12639660_0_126407275_R | Metabolic pathways                       | 0.010167268 | Cox15; Cyp1a1; Fut2; Gatm; Ggt1; Idh2; Lao1; Lipf; Nme4; Pigx; Pla2g10; Tph1                               | Metabolic pathways                       |
| 389 | chr15_7840337_7_78412545_F  | Metabolic pathways                       | 0.010167268 | Cox15; Cyp1a1; Fut2; Gatm; Ggt1; Idh2; Lao1; Lipf; Nme4; Pigx; Pla2g10; Tph1                               | Metabolic pathways                       |
| 390 | chr10_1803649_0_18059965_F  | Thyroid hormone synthesis                | 0.01017046  | Lrp2; Tg; Tshr                                                                                             | Thyroid hormone synthesis                |
| 391 | chr4_11679037_3_116797823_F | Metabolic pathways                       | 0.010253936 | Atp2a1; Cox15; Cyp1a1; Fut2; Gatm; Ggt1; Idh2; Impdh1; Lao1; Lipf; Nme4; Phgdh; Pigx; Pla2g10; Tph1        | Metabolic pathways                       |

|     |                             |                                          |             |                                                                                                                           |                                          |
|-----|-----------------------------|------------------------------------------|-------------|---------------------------------------------------------------------------------------------------------------------------|------------------------------------------|
| 392 | ENSMUST00000157205          | Metabolic pathways                       | 0.010253936 | Atp5h; Cox15;<br>Cyp1a1; Fut2; Gatm;<br>Ggt1; Idh2; Impdh1;<br>Lao1; Lipf; Nme4;<br>Phgdh; Pigx; Pla2g10;<br>Tph1; Cox15; | Metabolic pathways                       |
| 393 | chr7_80762708_80763274_R    | Metabolic pathways                       | 0.010253936 | Cyp1a1; Fut2; Gatm;<br>Ggt1; Idh2; Impdh1;<br>Lao1; Lipf; Nme4;<br>Phgdh; Pigx; Pla2g10;<br>Tph1; Cox15;                  | Metabolic pathways                       |
| 394 | FR061730                    | Metabolic pathways                       | 0.010253936 | Cyp1a1; Fut2; Gatm;<br>Ggt1; Idh2; Impdh1;<br>Lao1; Lipf; Nme4;<br>Phgdh; Pigx; Pla2g10;<br>Tph1; Cox15;                  | Metabolic pathways                       |
| 395 | uc.411+                     | Metabolic pathways                       | 0.010253936 | Cyp1a1; Fut2; Gatm;<br>Ggt1; Idh2; Impdh1;<br>Lao1; Lipf; Nme4;<br>Phgdh; Pigx; Pla2g10;<br>Tph1                          | Metabolic pathways                       |
| 396 | chr10_110014196_116920696_D | Glycine, serine and threonine metabolism | 0.010352518 | Gatm; Phgdh                                                                                                               | Glycine, serine and threonine metabolism |
| 397 | FR323263                    | NOD-like receptor signaling pathway      | 0.010380889 | Cxcl1; Mefv; Naip2                                                                                                        | NOD-like receptor signaling pathway      |
| 398 | n280963                     | Malaria                                  | 0.010518244 | Selp; Vcam1                                                                                                               | Malaria                                  |
| 399 | FR090778                    | TNF signaling pathway                    | 0.010552744 | Bcl3; Cxcl1; Vcam1                                                                                                        | TNF signaling pathway                    |
| 400 | chr8_48476637_48492537_R    | TNF signaling pathway                    | 0.010552744 | Bcl3; Cx3cl1; Vcam1                                                                                                       | TNF signaling pathway                    |
| 401 | FR302411                    | Cell adhesion molecules (CAMs)           | 0.010559807 | Icos; Nrxa2; Sdc3; Selp; Vcam1                                                                                            | Cell adhesion molecules (CAMs)           |
| 402 | chr10_110102044_110228345_D | Cell adhesion molecules (CAMs)           | 0.010559807 | Icos; Nrxa2; Sdc3; Selp; Vcam1                                                                                            | Cell adhesion molecules (CAMs)           |
| 403 | chr9_27155685_27156100_F    | Neuroactive ligand-receptor interaction  | 0.010666207 | Grid2; P2ry1; Sctr; Tshr                                                                                                  | Neuroactive ligand-receptor interaction  |
| 404 | FR203009                    | Thyroid hormone synthesis                | 0.010761766 | Lrp2; Tg; Tshr                                                                                                            | Thyroid hormone synthesis                |
| 405 | FR203009                    | Bile secretion                           | 0.010761766 | Aqp4; Nceh1; Sctr                                                                                                         | Bile secretion                           |
| 406 | FR142459                    | Ether lipid metabolism                   | 0.010844801 | Pla2g10; Pla2g7                                                                                                           | Ether lipid metabolism                   |
| 407 | chr10_24269165_24276690_F   | Tryptophan metabolism                    | 0.010866744 | Cyp1a1; Lao1; Tph1                                                                                                        | Tryptophan metabolism                    |
| 408 | FR180118                    | Lysosome                                 | 0.010881252 | Acp5; Cd68; Ctsz                                                                                                          | Lysosome                                 |
| 409 | FR000826                    | Lysosome                                 | 0.010881252 | Acp5; Cd68; Ctsz                                                                                                          | Lysosome                                 |
| 410 | FR312018                    | Lysosome                                 | 0.010881252 | Acp5; Cd68; Ctsz                                                                                                          | Lysosome                                 |
| 411 | FR398266                    | Lysosome                                 | 0.010881252 | Acp5; Cd68; Ctsz                                                                                                          | Lysosome                                 |
| 412 | chr2_132722530_132726802_F  | Glycine, serine and threonine metabolism | 0.011054674 | Gatm; Phgdh                                                                                                               | Glycine, serine and threonine metabolism |
| 413 | chr4_88745771_88776323_F    | Metabolic pathways                       | 0.011117121 | Atp5h; Cox15;<br>Cyp1a1; Fut2; Gatm;<br>Ggt1; Idh2; Lao1; Lipf;<br>Nme4; Phgdh; Pigx;<br>Pla2g10; Tph1                    | Metabolic pathways                       |

|     |                             |                           |             |                                                                                                      |                           |
|-----|-----------------------------|---------------------------|-------------|------------------------------------------------------------------------------------------------------|---------------------------|
| 414 | chr10_8606683_8665783_R     | Metabolic pathways        | 0.011117121 | Atp5h; Cox15;<br>Cyp1a1; Fut2; Gatm;<br>Ggt1; Idh2; Lao1; Lipf; Nme4; Phgdh; Pigx;<br>Pla2g10; Tph1  | Metabolic pathways        |
| 415 | FR057053                    | Metabolic pathways        | 0.011117121 | Atp5h; Cox15;<br>Cyp1a1; Fut2; Gatm;<br>Ggt1; Idh2; Lao1; Lipf; Nme4; Phgdh; Pigx;<br>Pla2g10; Tph1  | Metabolic pathways        |
| 416 | FR375498                    | Metabolic pathways        | 0.011117121 | Atp5h; Cox15;<br>Cyp1a1; Fut2; Gatm;<br>Ggt1; Idh2; Lao1; Lipf; Nme4; Phgdh; Pigx;<br>Pla2g10; Tph1  | Metabolic pathways        |
| 417 | FR215734                    | Metabolic pathways        | 0.011117121 | Atp5h; Cox15;<br>Cyp1a1; Fut2; Gatm;<br>Ggt1; Idh2; Impdh1; Lao1; Lipf; Nme4;<br>Pigx; Pla2g10; Tph1 | Metabolic pathways        |
| 418 | FR347914                    | Metabolic pathways        | 0.011117121 | Atp5h; Cox15;<br>Cyp1a1; Fut2; Gatm;<br>Ggt1; Idh2; Impdh1; Lao1; Lipf; Nme4;<br>Pigx; Pla2g10; Tph1 | Metabolic pathways        |
| 419 | n414371                     | Metabolic pathways        | 0.011117121 | Atp5h; Cox15;<br>Cyp1a1; Fut2; Gatm;<br>Ggt1; Idh2; Lao1; Lipf; Nme4; Phgdh; Pigx;<br>Pla2g10; Tph1  | Metabolic pathways        |
| 420 | chr8_11973234_8_119749198_R | Metabolic pathways        | 0.011117121 | Atp5h; Cox15;<br>Cyp1a1; Fut2; Gatm;<br>Ggt1; Idh2; Lao1; Lipf; Nme4; Phgdh; Pigx;<br>Pla2g10; Tph1  | Metabolic pathways        |
| 421 | FR136228                    | Metabolic pathways        | 0.011117121 | Atp5h; Cox15; Fut2;<br>Gatm; Ggt1; Idh2;<br>Impdh1; Lao1; Lipf; Nme4;<br>Pigx; Pla2g10; Tph1         | Metabolic pathways        |
| 422 | FR296035                    | Metabolic pathways        | 0.011117121 | Atp5h; Cox15; Fut2;<br>Gatm; Ggt1; Idh2;<br>Impdh1; Lao1; Lipf; Nme4; Phgdh; Pigx;<br>Pla2g10; Tph1  | Metabolic pathways        |
| 423 | FR187810                    | Thyroid hormone synthesis | 0.011372647 | Lrp2; Tg; Tshr                                                                                       | Thyroid hormone synthesis |
| 424 | FR263105                    | Thyroid hormone synthesis | 0.011372647 | Lrp2; Tg; Tshr                                                                                       | Thyroid hormone synthesis |
| 425 | chr19_3304947_9_33054553_R  | Phagosome                 | 0.011377529 | Cd209a; Cd209f;<br>Clec7a; Ncf4                                                                      | Phagosome                 |
| 426 | FR167447                    | PPAR signaling pathway    | 0.011414681 | Angptl4; Cpt2; Fabp3                                                                                 | PPAR signaling pathway    |
| 427 | FR273612                    | PPAR signaling pathway    | 0.011414681 | Angptl4; Cpt2; Fabp3                                                                                 | PPAR signaling pathway    |

|     |                            |                                     |             |                                                                                                  |                                     |
|-----|----------------------------|-------------------------------------|-------------|--------------------------------------------------------------------------------------------------|-------------------------------------|
| 428 | FR180118                   | Osteoclast differentiation          | 0.011615554 | Acp5; Ncf4; Sirpb1a                                                                              | Osteoclast differentiation          |
| 429 | n415399                    | Osteoclast differentiation          | 0.011615554 | Acp5; Ncf4; Sirpb1a                                                                              | Osteoclast differentiation          |
| 430 | FR312018                   | Osteoclast differentiation          | 0.011615554 | Acp5; Ncf4; Sirpb1a                                                                              | Osteoclast differentiation          |
| 431 | FR000826                   | Osteoclast differentiation          | 0.011615554 | Acp5; Ncf4; Sirpb1a                                                                              | Osteoclast differentiation          |
| 432 | FR283504                   | Tryptophan metabolism               | 0.011650209 | Cyp1a1; Lao1; Tph1                                                                               | Tryptophan metabolism               |
| 433 | chr6_86425510_86450160_F   | NOD-like receptor signaling pathway | 0.011804849 | Cxcl1; Naip2                                                                                     | NOD-like receptor signaling pathway |
| 434 | chr6_86425510_86450160_F   | Legionellosis                       | 0.011804849 | Cxcl1; Naip2                                                                                     | Legionellosis                       |
| 435 | chr17_6406336_2_64066067_R | NOD-like receptor signaling pathway | 0.011856089 | Cxcl1; Mefv; Naip2                                                                               | NOD-like receptor signaling pathway |
| 436 | chr16_4472017_0_44723911_R | Fat digestion and absorption        | 0.011940412 | Lipf; Pla2g10                                                                                    | Fat digestion and absorption        |
| 437 | FR065159                   | Fat digestion and absorption        | 0.011940412 | Lipf; Pla2g10                                                                                    | Fat digestion and absorption        |
| 438 | n415160                    | Lysosome                            | 0.011950867 | Acp5; Cd68; Ctsz                                                                                 | Lysosome                            |
| 439 | n283487                    | Lysosome                            | 0.011950867 | Acp5; Cd68; Ctsz                                                                                 | Lysosome                            |
| 440 | FR283503                   | Lysosome                            | 0.011950867 | Acp5; Cd68; Ctsz<br>Atp5h; Cox15; Fut2;<br>Gatm; Ggt1; Idh2;                                     | Lysosome                            |
| 441 | FR331566                   | Metabolic pathways                  | 0.011989959 | Lao1; Lipf; Nme4;<br>Phgdh; Pigx; Pla2g10;<br>Tph1<br>Atp5h; Cox15; Gatm;<br>Ggt1; Idh2; Impdh1; | Metabolic pathways                  |
| 442 | FR150789                   | Metabolic pathways                  | 0.011989959 | Lao1; Lipf; Nme4;<br>Phgdh; Pigx; Pla2g10;<br>Tph1<br>Atp5h; Cox15;<br>Cyp1a1; Fut2; Gatm;       | Metabolic pathways                  |
| 443 | FR233225                   | Metabolic pathways                  | 0.011989959 | Ggt1; Idh2; Lao1; Lipf;<br>Nme4; Pigx; Pla2g10;<br>Atp5h; Cox15;<br>Cyp1a1; Fut2; Gatm;          | Metabolic pathways                  |
| 444 | FR385633                   | Metabolic pathways                  | 0.011989959 | Ggt1; Idh2; Impdh1;<br>Lao1; Lipf; Nme4;<br>Atp5h; Cox15;<br>Cyp1a1; Fut2; Gatm;                 | Metabolic pathways                  |
| 445 | FR162485                   | Metabolic pathways                  | 0.011989959 | Ggt1; Idh2; Lao1; Lipf;<br>Nme4; Pigx; Pla2g10;<br>Tph1                                          | Metabolic pathways                  |
| 446 | chr7_26212709_26230775_F   | Thyroid hormone synthesis           | 0.012003213 | Lrp2; Tg; Tshr                                                                                   | Thyroid hormone synthesis           |
| 447 | ENSMUST00000180590         | Tryptophan metabolism               | 0.012070388 | Lao1; Tph1                                                                                       | Tryptophan metabolism               |
| 448 | ENSMUST00000180590         | ABC transporters                    | 0.012070388 | Abcb8; Abcg3                                                                                     | ABC transporters                    |
| 449 | FR057875                   | ABC transporters                    | 0.012070388 | Abcb8; Abcg3                                                                                     | ABC transporters                    |
| 450 | FR057875                   | Tryptophan metabolism               | 0.012070388 | Lao1; Tph1                                                                                       | Tryptophan metabolism               |
| 451 | n415206                    | Mineral absorption                  | 0.012070388 | Ftl1; Slc39a4                                                                                    | Mineral absorption                  |
| 452 | FR044110                   | TNF signaling pathway               | 0.012470889 | Bcl3; Cx3cl1; Vcam1                                                                              | TNF signaling pathway               |

|     |                                     |                                 |             |                                                                                                                                                  |                                 |
|-----|-------------------------------------|---------------------------------|-------------|--------------------------------------------------------------------------------------------------------------------------------------------------|---------------------------------|
| 453 | FR017535                            | Metabolic pathways              | 0.0124712   | Atp5n; Cox1c;<br>Cyp1a1; Fut2; Gatm;<br>Ggt1; Idh2; Impdh1;<br>Lao1; Lipf; Nme4;<br>Phgdh; Pigx; Pla2g10;<br>Tph1; Cox1c;<br>Cyp1a1; Fut2; Gatm; | Metabolic pathways              |
| 454 | FR283931                            | Metabolic pathways              | 0.0124712   | Ggt1; Idh2; Impdh1;<br>Lao1; Lipf; Nme4;<br>Phgdh; Pigx; Pla2g10;<br>Tph1; Cox1c;<br>Cyp1a1; Fut2; Gatm;                                         | Metabolic pathways              |
| 455 | NR_033764.1                         | Metabolic pathways              | 0.0124712   | Ggt1; Idh2; Impdh1;<br>Lao1; Lipf; Nme4;<br>Phgdh; Pigx; Pla2g10;<br>Tph1; Cox1c;<br>Cyp1a1; Fut2; Gatm;                                         | Metabolic pathways              |
| 456 | chr9_12184592<br>0_121858120_F      | Metabolic pathways              | 0.0124712   | Ggt1; Idh2; Impdh1;<br>Lao1; Lipf; Nme4;<br>Phgdh; Pigx; Pla2g10;<br>Tph1; Cox1c;<br>Cyp1a1; Fut2; Gatm;                                         | Metabolic pathways              |
| 457 | chr13_1594752<br>1_15999246_R       | Metabolic pathways              | 0.0124712   | Ggt1; Idh2; Impdh1;<br>Lao1; Lipf; Nme4;<br>Phgdh; Pigx; Pla2g10;<br>Tph1; Cox1c;<br>Cyp1a1; Fut2; Gatm;                                         | Metabolic pathways              |
| 458 | FR065962                            | Metabolic pathways              | 0.0124712   | Ggt1; Idh2; Impdh1;<br>Lao1; Lipf; Nme4;<br>Phgdh; Pigx; Pla2g10;<br>Tph1; Cox1c;<br>Cyp1a1; Fut2; Gatm;                                         | Metabolic pathways              |
| 459 | chr9_56646768<br>_56649068_R        | Metabolic pathways              | 0.0124712   | Ggt1; Idh2; Impdh1;<br>Lao1; Lipf; Nme4;<br>Phgdh; Pigx; Pla2g10;<br>Tph1; Cox1c;<br>Cyp1a1; Fut2; Gatm;                                         | Metabolic pathways              |
| 460 | chr15_1009083<br>23_100908645_<br>F | Metabolic pathways              | 0.0124712   | Ggt1; Idh2; Impdh1;<br>Lao1; Lipf; Nme4;<br>Phgdh; Pigx; Pla2g10;<br>Tph1; Cox1c;<br>Cyp1a1; Fut2; Gatm;                                         | Metabolic pathways              |
| 461 | FR030947                            | Metabolic pathways              | 0.0124712   | Ggt1; Idh2; Impdh1;<br>Lao1; Lipf; Nme4;<br>Phgdh; Pigx; Pla2g10;<br>Tph1; Cox1c;<br>Cyp1a1; Fut2; Gatm;                                         | Metabolic pathways              |
| 462 | n272641                             | Metabolic pathways              | 0.0124712   | Ggt1; Idh2; Impdh1;<br>Lao1; Lipf; Nme4;<br>Phgdh; Pigx; Pla2g10;<br>Tph1                                                                        | Metabolic pathways              |
| 463 | FR114000                            | Fat digestion and<br>absorption | 0.012669132 | Lipf; Pla2g10                                                                                                                                    | Fat digestion and<br>absorption |

|     |                                |                                              |             |                                                                                       |                                              |
|-----|--------------------------------|----------------------------------------------|-------------|---------------------------------------------------------------------------------------|----------------------------------------------|
| 464 | FR396644                       | Fat digestion and absorption                 | 0.012669132 | Lipf; Pla2g10                                                                         | Fat digestion and absorption                 |
| 465 | chr14_7372997<br>7_73751877_R  | Fat digestion and absorption                 | 0.012669132 | Lipf; Pla2g10                                                                         | Fat digestion and absorption                 |
| 466 | chr14_1468847<br>2_14747272_F  | Fat digestion and absorption                 | 0.012669132 | Lipf; Pla2g10                                                                         | Fat digestion and absorption                 |
| 467 | n294011                        | Fat digestion and absorption                 | 0.012669132 | Lipf; Pla2g10                                                                         | Fat digestion and absorption                 |
| 468 | chr8_10815347<br>1_108159672_F | Fat digestion and absorption                 | 0.012669132 | Lipf; Pla2g10                                                                         | Fat digestion and absorption                 |
| 469 | n415160                        | Osteoclast differentiation                   | 0.012753717 | Acp5; Ncf4; Sirpb1a                                                                   | Osteoclast differentiation                   |
| 470 | FR202182                       | Metabolic pathways                           | 0.012841866 | Cox15; Cyp1a1; Fut2;<br>Gatm; Ggt1; Idh2;<br>Lao1; Lipf; Nme4;<br>Pigx; Pla2g10; Tph1 | Metabolic pathways                           |
| 471 | ENSMUST000<br>00139056         | Metabolic pathways                           | 0.012841866 | Cox15; Cyp1a1; Fut2;<br>Gatm; Ggt1; Idh2;<br>Lao1; Lipf; Nme4;<br>Pigx; Pla2g10; Tph1 | Metabolic pathways                           |
| 472 | FR140001                       | Metabolic pathways                           | 0.012841866 | Atp5b1; Cox15;<br>Cyp1a1; Fut2; Gatm;<br>Ggt1; Idh2; Lipf;<br>Nme4; Pigx; Pla2g10;    | Metabolic pathways                           |
| 473 | FR238898<br>chr10_1100141      | Tryptophan metabolism                        | 0.01288529  | Tph1<br>Cyp1a1; Lao1; Tph1                                                            | Tryptophan metabolism                        |
| 474 | 96_116920696_<br>chr10_1100141 | Tryptophan metabolism                        | 0.012915348 | Lao1; Tph1                                                                            | Tryptophan metabolism                        |
| 475 | 96_116920696_<br>chr10_1100141 | ABC transporters                             | 0.012915348 | Abcb8; Abcg3                                                                          | ABC transporters                             |
| 476 | FR388349                       | Lysosome                                     | 0.013078865 | Acp5; Cd68; Ctsz                                                                      | Lysosome                                     |
| 477 | FR106089                       | Lysosome                                     | 0.013078865 | Acp5; Cd68; Ctsz                                                                      | Lysosome                                     |
| 478 | chr9_27148989<br>_27155714_R   | Ether lipid metabolism                       | 0.013112263 | Pla2g10; Pla2g7                                                                       | Ether lipid metabolism                       |
| 479 | chr1_92546371<br>_92551596_R   | Ether lipid metabolism                       | 0.013112263 | Pla2g10; Pla2g7                                                                       | Ether lipid metabolism                       |
| 480 | FR394282                       | Intestinal immune network for IgA production | 0.013112263 | Icos; Pigr                                                                            | Intestinal immune network for IgA production |
| 481 | FR001084                       | Glycine, serine and threonine metabolism     | 0.013283234 | Gatm; Phgdh                                                                           | Glycine, serine and threonine metabolism     |
| 482 | FR000724                       | Glycine, serine and threonine metabolism     | 0.013283234 | Gatm; Phgdh                                                                           | Glycine, serine and threonine metabolism     |
| 483 | chr4_35106125<br>_35127700_F   | Fat digestion and absorption                 | 0.013416882 | Lipf; Pla2g10                                                                         | Fat digestion and absorption                 |
| 484 | n343177                        | Fat digestion and absorption                 | 0.013416882 | Lipf; Pla2g10                                                                         | Fat digestion and absorption                 |
| 485 | ENSMUST000<br>00130677         | NOD-like receptor signaling pathway          | 0.01344618  | Cxcl1; Mefv; Naip2                                                                    | NOD-like receptor signaling pathway          |
| 486 | chr2_11679688<br>7_116797441_F | Neuroactive ligand-receptor interaction      | 0.013466307 | Grid2; Grik3; P2ry1;<br>Sctr; Tshr                                                    | Neuroactive ligand-receptor interaction      |
| 487 | NR_102339.1                    | TNF signaling pathway                        | 0.013499916 | Bcl3; Cx3cl1; Vcam1                                                                   | TNF signaling pathway                        |

|     |                                    |                                                    |             |                                                                                                        |                                                    |
|-----|------------------------------------|----------------------------------------------------|-------------|--------------------------------------------------------------------------------------------------------|----------------------------------------------------|
| 488 | FR283082                           | Metabolic pathways                                 | 0.013616494 | Atp5h; Cox15; Fut2;<br>Gatm; Ggt1; Idh2;<br>Impdh1; Lao1; Lipf;<br>Nme4; Phgdh; Pigx;<br>Pla2g10; Tph1 | Metabolic pathways                                 |
| 489 | chr1_19644530<br>4_196445818_<br>R | Metabolic pathways                                 | 0.013616494 | Atp5h; Cox15;<br>Cyp1a1; Fut2; Gatm;<br>Ggt1; Idh2; Lao1; Lipf;<br>Nme4; Phgdh; Pigx;<br>Pla2g10; Tph1 | Metabolic pathways                                 |
| 490 | ENSMUST000<br>00150216             | Metabolic pathways                                 | 0.013616494 | Atp5h; Cox15;<br>Cyp1a1; Fut2; Gatm;<br>Ggt1; Idh2; Lao1; Lipf;<br>Nme4; Phgdh; Pigx;<br>Pla2g10; Tph1 | Metabolic pathways                                 |
| 491 | chr12_8951967<br>5_89533975_F      | Metabolic pathways                                 | 0.013616494 | Atp5h; Cox15;<br>Cyp1a1; Fut2; Gatm;<br>Ggt1; Idh2; Lao1; Lipf;<br>Nme4; Phgdh; Pigx;<br>Pla2g10; Tph1 | Metabolic pathways                                 |
| 492 | chr1_13857010<br>7_138632310_<br>R | Metabolic pathways                                 | 0.013616494 | Atp5h; Cox15;<br>Cyp1a1; Fut2; Gatm;<br>Ggt1; Idh2; Lao1; Lipf;<br>Nme4; Phgdh; Pigx;<br>Pla2g10; Tph1 | Metabolic pathways                                 |
| 493 | chr8_10815347<br>1_108159672_F     | Metabolic pathways                                 | 0.013625166 | Cox15; Cyp1a1; Fut2;<br>Gatm; Ggt1; Lao1;<br>Lipf; Nme4; Pigx;<br>Pla2g10; Tph1                        | Metabolic pathways                                 |
| 494 | chr2_13272253<br>0_132726802_F     | ABC transporters                                   | 0.01378544  | Abcb8; Abcg3                                                                                           | ABC transporters                                   |
| 495 | chr2_13272253<br>0_132726802_F     | Tryptophan metabolism                              | 0.01378544  | Lao1; Tph1                                                                                             | Tryptophan metabolism                              |
| 496 | FR124060                           | Tryptophan metabolism                              | 0.01378544  | Lao1; Tph1                                                                                             | Tryptophan metabolism                              |
| 497 | FR301567                           | Intestinal immune<br>network for IgA<br>production | 0.013910127 | Icos; Pigr                                                                                             | Intestinal immune<br>network for IgA<br>production |
| 498 | FR375933                           | Ether lipid metabolism                             | 0.013910127 | Pla2g10; Pla2g7                                                                                        | Ether lipid metabolism                             |
| 499 | chr8_10815347<br>1_108159672_F     | Intestinal immune<br>network for IgA<br>production | 0.013910127 | Icos; Pigr                                                                                             | Intestinal immune<br>network for IgA<br>production |
| 500 | chr2_11454222<br>_11456321_R       | Intestinal immune<br>network for IgA<br>production | 0.013910127 | Icos; Pigr                                                                                             | Intestinal immune<br>network for IgA<br>production |

---





**Table-S6 200 most significant related TF-lncRNA pairs**

| No | groups                     | p.value     | TransFactor |
|----|----------------------------|-------------|-------------|
| 1  | chr9_4260788_4261404_F     | 0.000232945 | Myod1       |
| 2  | chr2_108456668_108532418_R | 0.000382705 | Myod1       |
| 3  | n271825                    | 0.000382705 | Myod1       |
| 4  | chr11_87841800_87858725_F  | 0.000530277 | Myod1       |
| 5  | FR312018                   | 0.000627705 | Pparg       |
| 6  | FR114000                   | 0.000631573 | Myod1       |
| 7  | chr8_108153471_108159672_F | 0.000884981 | Myod1       |
| 8  | n280804                    | 0.00101084  | Myod1       |
| 9  | FR032503                   | 0.001039101 | Myod1       |
| 10 | FR065159                   | 0.001039101 | Myod1       |
| 11 | uc.31+                     | 0.001041428 | Myod1       |
| 12 | n280963                    | 0.001126365 | Pparg       |
| 13 | FR085857                   | 0.001135682 | Nr2f1       |
| 14 | n272641                    | 0.001188641 | Myod1       |
| 15 | FR301567                   | 0.001216696 | Myod1       |
| 16 | FR034857                   | 0.001220911 | Myod1       |
| 17 | FR301809                   | 0.001220911 | Myod1       |
| 18 | ENSMUST00000149707         | 0.001235286 | Pparg       |
| 19 | chr12_16873410_16873872_F  | 0.00139461  | Myod1       |
| 20 | chr12_16873410_16873872_F  | 0.00139461  | Myod1       |
| 21 | FR134333                   | 0.001442956 | Myod1       |
| 22 | FR028133                   | 0.001516808 | Nr2f1       |
| 23 | FR301533                   | 0.001613956 | Myod1       |
| 24 | FR052210                   | 0.001691254 | Myod1       |
| 25 | chr3_21964899_21974524_F   | 0.001784139 | Nr5a1       |
| 26 | chr13_66381200_66410200_F  | 0.001788336 | Myod1       |
| 27 | FR120704                   | 0.001861916 | Myod1       |
| 28 | chr7_134372392_134372943_R | 0.001925165 | Myod1       |
| 29 | FR374009                   | 0.001925165 | Myod1       |
| 30 | FR065159                   | 0.001953462 | Tcf3        |
| 31 | FR074898                   | 0.001973896 | Myod1       |
| 32 | XR_104983.1                | 0.002002992 | Myod1       |
| 33 | FR334236                   | 0.002091332 | Myod1       |
| 34 | n344241                    | 0.002091332 | Myod1       |
| 35 | chr7_82902248_82955248_F   | 0.002215648 | Myod1       |
| 36 | FR087925                   | 0.002225431 | Myod1       |
| 37 | FR140001                   | 0.002225431 | Myod1       |
| 38 | n343177                    | 0.002225431 | Myod1       |
| 39 | chr8_126396600_126407275_R | 0.002295215 | Myod1       |
| 40 | FR289473                   | 0.002295215 | Myod1       |
| 41 | chr13_74642700_74701900_F  | 0.002345082 | Myod1       |
| 42 | FR000826                   | 0.002411501 | Pparg       |
| 43 | chr2_116796887_116797441_F | 0.002455415 | Myod1       |
| 44 | FR134333                   | 0.00249149  | Tcf3        |
| 45 | n343233                    | 0.002514735 | Pparg       |
| 46 | FR286933                   | 0.002564112 | Myod1       |
| 47 | chr9_27155685_27156100_F   | 0.002656004 | Nr2f1       |
| 48 | FR087735                   | 0.002662388 | Myod1       |
| 49 | FR040835                   | 0.002793648 | Myod1       |
| 50 | chr19_23068397_23190256_R  | 0.002807297 | Myod1       |
| 51 | chr5_31883451_31884082_F   | 0.002807297 | Myod1       |
| 52 | FR249432                   | 0.002807297 | Myod1       |
| 53 | Gomafu                     | 0.002807297 | Myod1       |
| 54 | FR129526                   | 0.002944933 | Myod1       |
| 55 | n415372                    | 0.002944933 | Myod1       |
| 56 | FR099681                   | 0.003070162 | Myod1       |
| 57 | n416957                    | 0.003070162 | Myod1       |
| 58 | chr1_69531191_69570566_F   | 0.00316791  | Pparg       |
| 59 | ENSMUST00000139056         | 0.003176394 | Myod1       |

|     |                            |             |       |
|-----|----------------------------|-------------|-------|
| 60  | FR202182                   | 0.003176394 | Myod1 |
| 61  | FR000724                   | 0.003176785 | Aire  |
| 62  | chr9_4260788_4261404_F     | 0.003180795 | Tcf3  |
| 63  | FR114000                   | 0.003183302 | Tcf3  |
| 64  | chr6_129151512_129208737_R | 0.003200479 | Myod1 |
| 65  | FR199374                   | 0.003200479 | Myod1 |
| 66  | n263541                    | 0.003285951 | Rxra  |
| 67  | n290758                    | 0.003292255 | Rxra  |
| 68  | chr1_92546371_92551596_R   | 0.003352549 | Nr2f1 |
| 69  | n291764                    | 0.003352549 | Nr2f1 |
| 70  | chr8_41475940_41476460_F   | 0.003371833 | Myod1 |
| 71  | FR117799                   | 0.003371833 | Myod1 |
| 72  | FR234548                   | 0.003371833 | Myod1 |
| 73  | FR054246                   | 0.003481462 | Pparg |
| 74  | chr8_96983590_96994419_F   | 0.003548114 | Pparg |
| 75  | n415206                    | 0.003633399 | Srf   |
| 76  | FR266999                   | 0.003638609 | Myod1 |
| 77  | FR392828                   | 0.003667529 | Srf   |
| 78  | chr15_78403377_78412545_F  | 0.003675691 | Myod1 |
| 79  | FR394282                   | 0.003675691 | Myod1 |
| 80  | chr3_35782698_35789932_R   | 0.00368153  | Rxra  |
| 81  | FR263105                   | 0.00370956  | Pparg |
| 82  | FR074898                   | 0.003714769 | Tcf3  |
| 83  | FR395572                   | 0.003848971 | Myod1 |
| 84  | n294791                    | 0.003848971 | Myod1 |
| 85  | NR_045776.1                | 0.003848971 | Myod1 |
| 86  | ENSMUST00000150216         | 0.003870866 | Myod1 |
| 87  | FR010306                   | 0.004125523 | Myod1 |
| 88  | chr3_21964899_21974524_F   | 0.004139359 | Nr2f1 |
| 89  | FR060087                   | 0.00415059  | Pparg |
| 90  | FR396644                   | 0.004237949 | Myod1 |
| 91  | chr2_71576218_71603818_R   | 0.004284779 | Rxra  |
| 92  | chr8_108153471_108159672_F | 0.004317769 | Tcf3  |
| 93  | chr8_126396600_126407275_R | 0.004317769 | Tcf3  |
| 94  | FR238898                   | 0.004319409 | Rxra  |
| 95  | FR394282                   | 0.004327227 | Srf   |
| 96  | n292619                    | 0.004335736 | Nr5a1 |
| 97  | chr17_29374758_29387733_R  | 0.004380718 | Myod1 |
| 98  | chr9_27148989_27155714_R   | 0.004403908 | Aire  |
| 99  | n289590                    | 0.004447706 | Aire  |
| 100 | n343177                    | 0.004523539 | Tcf3  |
| 101 | chr8_48476637_48492537_F   | 0.004617378 | Pparg |
| 102 | FR066939                   | 0.004630984 | Myod1 |
| 103 | FR115704                   | 0.004630984 | Myod1 |
| 104 | FR142459                   | 0.004673715 | Nr2f1 |
| 105 | FR180118                   | 0.004720482 | Aire  |
| 106 | chr9_121845920_121858120_F | 0.004731276 | Myod1 |
| 107 | FR032503                   | 0.004745005 | Tcf3  |
| 108 | FR090778                   | 0.004759119 | Efna2 |
| 109 | FR078628                   | 0.004766833 | Rxra  |
| 110 | FR066939                   | 0.004778574 | Nr2f1 |
| 111 | chr8_48476637_48492537_F   | 0.004791327 | Rxra  |
| 112 | FR086793                   | 0.004868914 | Myod1 |
| 113 | chr9_27148989_27155714_R   | 0.004875597 | Nr5a1 |
| 114 | chr10_18036490_18059965_F  | 0.004906784 | Myod1 |
| 115 | FR215734                   | 0.004906784 | Myod1 |
| 116 | FR003529                   | 0.005052101 | Myod1 |
| 117 | chr7_96640618_96649018_F   | 0.005138718 | Rxra  |
| 118 | FR301567                   | 0.005199283 | Tcf3  |
| 119 | FR323263                   | 0.005206407 | Pparg |
| 120 | FR087925                   | 0.00523253  | Nr2f1 |

|     |                             |             |         |
|-----|-----------------------------|-------------|---------|
| 121 | FR142459                    | 0.005244934 | Nr5a1   |
| 122 | FR392828                    | 0.005248093 | Pparg   |
| 123 | FR396644                    | 0.00527982  | Rxra    |
| 124 | chr1_183783306_183834531_F  | 0.00540201  | Myod1   |
| 125 | FR003529                    | 0.005429193 | Rxra    |
| 126 | FR283504                    | 0.005433514 | Rxra    |
| 127 | chr9_56646768_56649068_R    | 0.005504941 | Myod1   |
| 128 | FR030947                    | 0.005504941 | Myod1   |
| 129 | FR273612                    | 0.005538306 | Esr1    |
| 130 | FR149067                    | 0.005574606 | Myod1   |
| 131 | chr11_6796679_6797670_F     | 0.005626567 | Myod1   |
| 132 | chr9_66976750_67014625_F    | 0.005704064 | Myod1   |
| 133 | FR279378                    | 0.005704064 | Myod1   |
| 134 | FR388349                    | 0.0057112   | Arhgef7 |
| 135 | FR388349                    | 0.0057112   | Cd40    |
| 136 | n283487                     | 0.0057112   | Arhgef7 |
| 137 | n283487                     | 0.0057112   | Cd40    |
| 138 | FR099681                    | 0.005766868 | Tcf3    |
| 139 | FR301809                    | 0.005766868 | Tcf3    |
| 140 | FR398266                    | 0.005901773 | Nr5a1   |
| 141 | chr1_162965001_162966376_F  | 0.005920099 | Myod1   |
| 142 | chr12_110003268_110030953_F | 0.005920099 | Myod1   |
| 143 | chr6_129151512_129208737_R  | 0.005960498 | Pparg   |
| 144 | chr11_120079199_120130099_R | 0.00598428  | Rxra    |
| 145 | chr18_69923410_69965360_R   | 0.00598428  | Rxra    |
| 146 | FR042390                    | 0.005995436 | Myod1   |
| 147 | FR208702                    | 0.005995436 | Myod1   |
| 148 | n415206                     | 0.00610045  | Myod1   |
| 149 | chr15_38205154_38206196_F   | 0.006161875 | Myod1   |
| 150 | FR064953                    | 0.006216656 | Runx3   |
| 151 | n283487                     | 0.006307416 | Esr1    |
| 152 | FR035623                    | 0.006350434 | Myod1   |
| 153 | FR285140                    | 0.006350434 | Myod1   |
| 154 | FR285140                    | 0.006350434 | Myod1   |
| 155 | chr6_47959825_47960502_R    | 0.006356264 | Myod1   |
| 156 | chr12_55271691_55276492_R   | 0.006361298 | Myod1   |
| 157 | chr5_35893908_35896613_R    | 0.006379325 | Rxra    |
| 158 | n297308                     | 0.006411243 | Aire    |
| 159 | FR388349                    | 0.006445616 | Nr2f1   |
| 160 | n414277                     | 0.006445616 | Nr2f1   |
| 161 | n415206                     | 0.006604408 | Pparg   |
| 162 | FR167447                    | 0.006635473 | Esr1    |
| 163 | ENSMUST00000132130          | 0.006644166 | Myod1   |
| 164 | FR296035                    | 0.006644166 | Myod1   |
| 165 | FR365932                    | 0.006644166 | Myod1   |
| 166 | FR365932                    | 0.006679862 | Nr2f1   |
| 167 | chr2_35828611_35838083_F    | 0.006713985 | Myod1   |
| 168 | chr5_54053882_54054174_F    | 0.006749165 | Esr1    |
| 169 | chr7_91558475_91733625_R    | 0.00679122  | Myod1   |
| 170 | FR325017                    | 0.006881757 | Myod1   |
| 171 | FR283082                    | 0.006938234 | Rxra    |
| 172 | FR203009                    | 0.007061258 | Pparg   |
| 173 | chr18_69923410_69965360_R   | 0.007068479 | Myod1   |
| 174 | n283487                     | 0.007071847 | Nr1h2   |
| 175 | chrX_102568332_102587093_R  | 0.007148422 | Myod1   |
| 176 | chrX_18734106_18744367_R    | 0.007148422 | Myod1   |
| 177 | FR092975                    | 0.007148422 | Myod1   |
| 178 | FR389545                    | 0.007148422 | Myod1   |
| 179 | chr7_31709550_31723025_F    | 0.0072095   | Myod1   |
| 180 | ENSMUST00000141575          | 0.007289777 | Rxra    |
| 181 | FR269524                    | 0.007295925 | Nr2f1   |

|     |                             |             |         |
|-----|-----------------------------|-------------|---------|
| 182 | FR066939                    | 0.007328014 | Nr5a1   |
| 183 | FR052210                    | 0.007358646 | Tcf3    |
| 184 | FR396644                    | 0.007358646 | Tcf3    |
| 185 | chr9_27148989_27155714_R    | 0.007388519 | Casr    |
| 186 | chr9_27148989_27155714_R    | 0.007388519 | Cxadr   |
| 187 | chr9_27148989_27155714_R    | 0.007388519 | Nr1h3   |
| 188 | chr9_27148989_27155714_R    | 0.007388519 | Prkar1a |
| 189 | chr9_27148989_27155714_R    | 0.007388519 | Spg7    |
| 190 | chr9_27148989_27155714_R    | 0.007388519 | Trim13  |
| 191 | chr11_120079199_120130099_R | 0.007461167 | Nr2f1   |
| 192 | FR388349                    | 0.00746851  | Runx3   |
| 193 | chr7_133402766_133415516_R  | 0.007478924 | Rxra    |
| 194 | FR065962                    | 0.007478924 | Rxra    |
| 195 | FR312820                    | 0.007668905 | Myod1   |
| 196 | chr13_98038568_98068079_F   | 0.00767049  | Myod1   |
| 197 | FR097477                    | 0.00767049  | Myod1   |
| 198 | FR139436                    | 0.00767049  | Myod1   |
| 199 | FR139436                    | 0.00767049  | Myod1   |
| 200 | FR155040                    | 0.00767049  | Myod1   |

---
